# Supplementary material for: Effect of data harmonization of multicentric dataset in ASD/TD classification
Source: Research Square preprint supplement (doi:10.21203/rs.3.rs-3143234/v1), 2023-07-12
Supplement: Supplementary file 1 [file 733bb41a349984b577d7ca20.docx]

Tables

In file Supplementary Tables:

- Numerosity of each site, for each data selection
- Subjects involved in each data selection
- List of the most important structural features in common for each harmonization method and for both, fQC and minSC, datasets.
- List of the most important connectivity features in common for each harmonization method and for both, fQC and minSC, datasets.

Figures


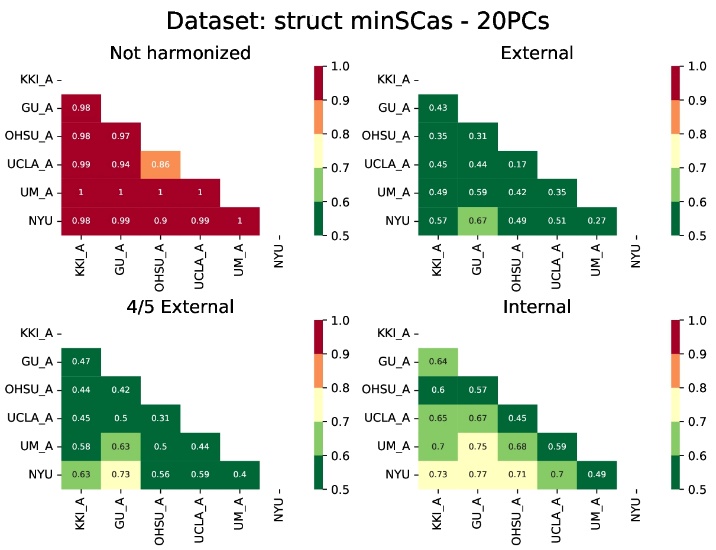

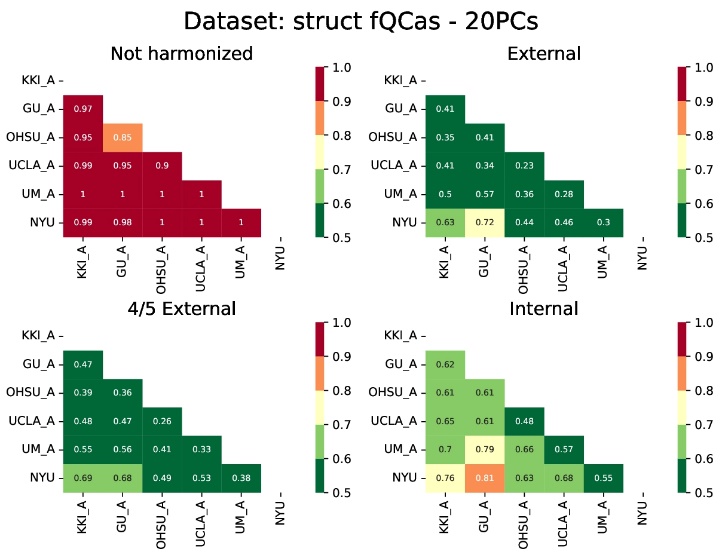


Fig.A1: Site identification for different harmonization strategies for structural features. Left: minSCas data set. Right: fQCas dataset. In order to limit LSS-LES effects, only sites with more than 20 TDs are considered.


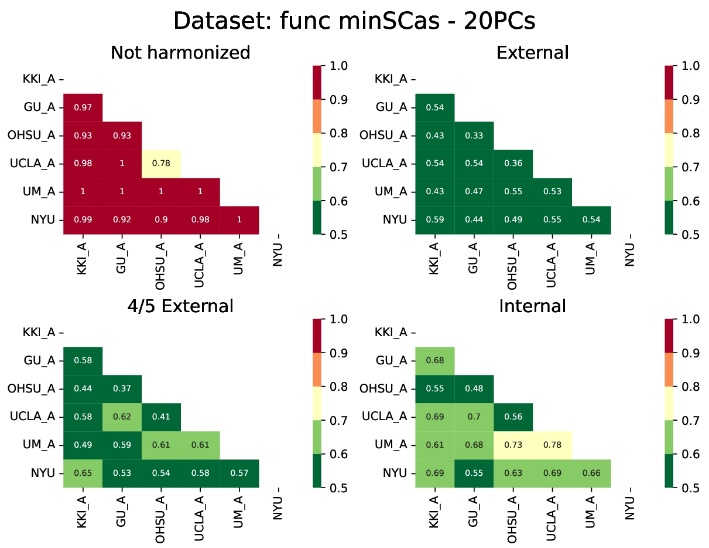

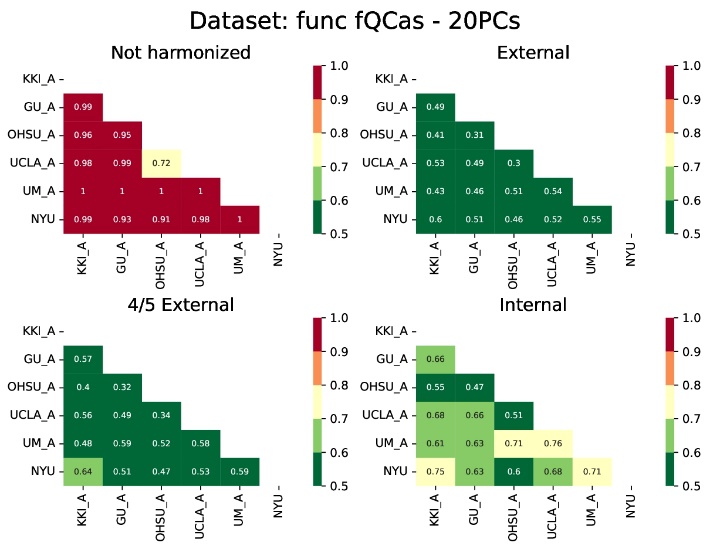


Fig.A2: Site identification for different harmonization strategies for connectivity features. Left: minSCas data set. Right: fQCas dataset. In order to limit LSS-LES effects, only sites with more than 20 TDs are considered.
