# Supplementary material for: Effect of data harmonization of multicentric dataset in ASD/TD classification
Source: Research Square preprint supplement (doi:10.21203/rs.3.rs-3143234/v1), 2023-07-12
Supplement: Supplementary file 2 [file cf8d582a2178f877e71da41f.xlsx]

## Sheet: TabSSS1 Data selections
Site		minSC	minSCas	fQC	fQCas
NYU	TD	73	37	59	36
	ASD	62	35	50	32
	Total	135	72	109	68
UCLA_A	TD	26	26	24	24
	ASD	33	32	31	30
	Total	59	58	55	54
UM_A	TD	33	30	31	30
	ASD	33	30	28	27
	Total	66	60	59	57
USM	TD	36	19	35	19
	ASD	46	25	41	21
	Total	82	44	76	40
YALE	TD	29	18	20	18
	ASD	19	16	17	14
	Total	39	34	37	32
GU_A	TD	26	19	25	19
	ASD	37	32	35	32
	Total	63	51	60	51
OHSU_A	TD	27	23	26	22
	ASD	29	27	26	24
	Total	56	50	52	46
TCD_A	TD	15	15	15	15
	ASD	19	19	17	17
	Total	34	34	32	32
NYU_A	TD	26	16	26	16
	ASD	36	10	30	9
	Total	62	26	56	25
KKI_A	TD	62	50	59	48
	ASD	30	22	23	20
	Total	92	72	82	68
Total	TD	688	520	618	473
	ASD	344	265	320	247
	Total	344	255	298	226

## Sheet: Subjects
	Data selection
Subject_ID	minSC	minSCas	fQC	fQCas
BNI_A_0029006	0	0	0	0
BNI_A_0029007	0	0	0	0
BNI_A_0029008	0	0	0	0
BNI_A_0029009	0	0	0	0
BNI_A_0029010	0	0	0	0
BNI_A_0029011	0	0	0	0
BNI_A_0029012	0	0	0	0
BNI_A_0029013	0	0	0	0
BNI_A_0029014	0	0	0	0
BNI_A_0029015	0	0	0	0
BNI_A_0029016	0	0	0	0
BNI_A_0029017	0	0	0	0
BNI_A_0029018	0	0	0	0
BNI_A_0029019	0	0	0	0
BNI_A_0029020	0	0	0	0
BNI_A_0029021	0	0	0	0
BNI_A_0029022	0	0	0	0
BNI_A_0029023	0	0	0	0
BNI_A_0029024	0	0	0	0
BNI_A_0029025	0	0	0	0
BNI_A_0029026	0	0	0	0
BNI_A_0029027	0	0	0	0
BNI_A_0029028	0	0	0	0
BNI_A_0029029	0	0	0	0
BNI_A_0029030	0	0	0	0
BNI_A_0029031	0	0	0	0
BNI_A_0029032	0	0	0	0
BNI_A_0029033	0	0	0	0
BNI_A_0029034	0	0	0	0
BNI_A_0029035	0	0	0	0
BNI_A_0029036	0	0	0	0
BNI_A_0029037	0	0	0	0
BNI_A_0029038	0	0	0	0
BNI_A_0029039	0	0	0	0
BNI_A_0029040	0	0	0	0
BNI_A_0029041	0	0	0	0
BNI_A_0029042	0	0	0	0
BNI_A_0029043	0	0	0	0
BNI_A_0029044	0	0	0	0
BNI_A_0029045	0	0	0	0
BNI_A_0029046	0	0	0	0
BNI_A_0029047	0	0	0	0
BNI_A_0029048	0	0	0	0
BNI_A_0029049	0	0	0	0
BNI_A_0029050	0	0	0	0
BNI_A_0029051	0	0	0	0
BNI_A_0029052	0	0	0	0
BNI_A_0029053	0	0	0	0
BNI_A_0029054	0	0	0	0
BNI_A_0029055	0	0	0	0
BNI_A_0029056	0	0	0	0
BNI_A_0030144	0	0	0	0
BNI_A_0030146	0	0	0	0
BNI_A_0030147	0	0	0	0
BNI_A_0030148	0	0	0	0
BNI_A_0030149	0	0	0	0
BNI_A_0030150	0	0	0	0
BNI_A_0030151	0	0	0	0
CALTECH_0051456	0	0	0	0
CALTECH_0051457	0	0	0	0
CALTECH_0051458	0	0	0	0
CALTECH_0051459	0	0	0	0
CALTECH_0051460	0	0	0	0
CALTECH_0051461	0	0	0	0
CALTECH_0051462	0	0	0	0
CALTECH_0051463	0	0	0	0
CALTECH_0051464	0	0	0	0
CALTECH_0051465	0	0	0	0
CALTECH_0051466	0	0	0	0
CALTECH_0051467	0	0	0	0
CALTECH_0051468	0	0	0	0
CALTECH_0051470	0	0	0	0
CALTECH_0051472	0	0	0	0
CALTECH_0051473	0	0	0	0
CALTECH_0051474	0	0	0	0
CALTECH_0051475	0	0	0	0
CALTECH_0051476	0	0	0	0
CALTECH_0051477	0	0	0	0
CALTECH_0051478	0	0	0	0
CALTECH_0051479	0	0	0	0
CALTECH_0051480	0	0	0	0
CALTECH_0051481	0	0	0	0
CALTECH_0051482	0	0	0	0
CALTECH_0051483	0	0	0	0
CALTECH_0051484	0	0	0	0
CALTECH_0051485	0	0	0	0
CALTECH_0051486	0	0	0	0
CALTECH_0051487	0	0	0	0
CALTECH_0051488	0	0	0	0
CALTECH_0051489	0	0	0	0
CALTECH_0051490	0	0	0	0
CALTECH_0051491	0	0	0	0
CALTECH_0051492	0	0	0	0
CALTECH_0051493	0	0	0	0
CMU_0050642	0	0	0	0
CMU_0050643	0	0	0	0
CMU_0050645	0	0	0	0
CMU_0050646	0	0	0	0
CMU_0050647	0	0	0	0
CMU_0050648	0	0	0	0
CMU_0050649	0	0	0	0
CMU_0050650	0	0	0	0
CMU_0050651	0	0	0	0
CMU_0050652	0	0	0	0
CMU_0050653	0	0	0	0
CMU_0050654	0	0	0	0
CMU_0050655	0	0	0	0
CMU_0050656	0	0	0	0
CMU_0050657	0	0	0	0
CMU_0050658	0	0	0	0
CMU_0050659	0	0	0	0
CMU_0050660	0	0	0	0
CMU_0050661	0	0	0	0
CMU_0050663	0	0	0	0
CMU_0050664	0	0	0	0
CMU_0050665	0	0	0	0
CMU_0050666	0	0	0	0
CMU_0050667	0	0	0	0
CMU_0050668	0	0	0	0
CMU_0050669	0	0	0	0
EMC_A_0029864	0	0	0	0
EMC_A_0029865	0	0	0	0
EMC_A_0029866	0	0	0	0
EMC_A_0029867	0	0	0	0
EMC_A_0029868	0	0	0	0
EMC_A_0029869	0	0	0	0
EMC_A_0029870	0	0	0	0
EMC_A_0029871	0	0	0	0
EMC_A_0029872	0	0	0	0
EMC_A_0029873	0	0	0	0
EMC_A_0029874	0	0	0	0
EMC_A_0029875	0	0	0	0
EMC_A_0029876	0	0	0	0
EMC_A_0029877	0	0	0	0
EMC_A_0029878	0	0	0	0
EMC_A_0029879	0	0	0	0
EMC_A_0029880	0	0	0	0
EMC_A_0029881	0	0	0	0
EMC_A_0029882	0	0	0	0
EMC_A_0029883	0	0	0	0
EMC_A_0029884	0	0	0	0
EMC_A_0029885	0	0	0	0
EMC_A_0029886	0	0	0	0
EMC_A_0029887	0	0	0	0
EMC_A_0029888	0	0	0	0
EMC_A_0029889	0	0	0	0
EMC_A_0029890	0	0	0	0
EMC_A_0029891	0	0	0	0
EMC_A_0029892	0	0	0	0
EMC_A_0029893	0	0	0	0
EMC_A_0029894	0	0	0	0
EMC_A_0029895	0	0	0	0
EMC_A_0029896	0	0	0	0
EMC_A_0029897	0	0	0	0
EMC_A_0029898	0	0	0	0
EMC_A_0029899	0	0	0	0
EMC_A_0029900	0	0	0	0
EMC_A_0029901	0	0	0	0
EMC_A_0029902	0	0	0	0
EMC_A_0029903	0	0	0	0
EMC_A_0029904	0	0	0	0
EMC_A_0029905	0	0	0	0
EMC_A_0029906	0	0	0	0
EMC_A_0029907	0	0	0	0
EMC_A_0029908	0	0	0	0
EMC_A_0029909	0	0	0	0
EMC_A_0029910	0	0	0	0
EMC_A_0029911	0	0	0	0
EMC_A_0029912	0	0	0	0
EMC_A_0029913	0	0	0	0
EMC_A_0029914	0	0	0	0
EMC_A_0029915	0	0	0	0
EMC_A_0029916	0	0	0	0
EMC_A_0029917	0	0	0	0
ETH_A_0029057	0	0	0	0
ETH_A_0029058	0	0	0	0
ETH_A_0029059	0	0	0	0
ETH_A_0029060	0	0	0	0
ETH_A_0029062	0	0	0	0
ETH_A_0029063	0	0	0	0
ETH_A_0029064	0	0	0	0
ETH_A_0029065	0	0	0	0
ETH_A_0029066	0	0	0	0
ETH_A_0029067	0	0	0	0
ETH_A_0029068	0	0	0	0
ETH_A_0029069	0	0	0	0
ETH_A_0029070	0	0	0	0
ETH_A_0029071	0	0	0	0
ETH_A_0029072	0	0	0	0
ETH_A_0029073	0	0	0	0
ETH_A_0029074	0	0	0	0
ETH_A_0029075	0	0	0	0
ETH_A_0029076	0	0	0	0
ETH_A_0029077	0	0	0	0
ETH_A_0029078	0	0	0	0
ETH_A_0029079	0	0	0	0
ETH_A_0029080	0	0	0	0
ETH_A_0029081	0	0	0	0
ETH_A_0029082	0	0	0	0
ETH_A_0029083	0	0	0	0
ETH_A_0029084	0	0	0	0
ETH_A_0029085	0	0	0	0
ETH_A_0029086	0	0	0	0
ETH_A_0029087	0	0	0	0
ETH_A_0029088	0	0	0	0
ETH_A_0029089	0	0	0	0
ETH_A_0029090	0	0	0	0
ETH_A_0029091	0	0	0	0
ETH_A_0029092	0	0	0	0
ETH_A_0029093	0	0	0	0
ETH_A_0029094	0	0	0	0
GU_A_0028741	1	1	1	1
GU_A_0028742	0	0	0	0
GU_A_0028743	1	1	1	1
GU_A_0028744	1	1	1	1
GU_A_0028745	1	1	1	1
GU_A_0028746	1	1	1	1
GU_A_0028747	1	1	1	1
GU_A_0028748	1	1	1	1
GU_A_0028749	0	0	0	0
GU_A_0028750	0	0	0	0
GU_A_0028751	0	0	0	0
GU_A_0028752	1	1	1	1
GU_A_0028753	0	0	0	0
GU_A_0028754	0	0	0	0
GU_A_0028755	1	0	0	0
GU_A_0028756	0	0	0	0
GU_A_0028757	0	0	0	0
GU_A_0028758	0	0	0	0
GU_A_0028759	0	0	0	0
GU_A_0028761	1	1	1	1
GU_A_0028762	1	1	1	1
GU_A_0028763	0	0	0	0
GU_A_0028764	1	1	1	1
GU_A_0028765	1	1	1	1
GU_A_0028766	0	0	0	0
GU_A_0028767	1	1	1	1
GU_A_0028768	1	1	1	1
GU_A_0028769	0	0	0	0
GU_A_0028770	0	0	0	0
GU_A_0028771	1	1	1	1
GU_A_0028772	0	0	0	0
GU_A_0028773	0	0	0	0
GU_A_0028774	1	1	1	1
GU_A_0028775	0	0	0	0
GU_A_0028776	0	0	0	0
GU_A_0028777	1	1	1	1
GU_A_0028778	1	1	1	1
GU_A_0028779	0	0	0	0
GU_A_0028780	0	0	0	0
GU_A_0028781	1	1	1	1
GU_A_0028782	1	1	1	1
GU_A_0028783	0	0	0	0
GU_A_0028784	1	0	1	0
GU_A_0028785	1	1	1	1
GU_A_0028786	0	0	0	0
GU_A_0028787	1	1	1	1
GU_A_0028788	1	1	1	1
GU_A_0028789	0	0	0	0
GU_A_0028790	1	1	1	1
GU_A_0028791	1	1	1	1
GU_A_0028792	1	1	1	1
GU_A_0028793	1	0	1	0
GU_A_0028794	0	0	0	0
GU_A_0028795	1	1	1	1
GU_A_0028796	1	1	1	1
GU_A_0028797	1	1	1	1
GU_A_0028798	1	1	1	1
GU_A_0028799	0	0	0	0
GU_A_0028800	1	1	1	1
GU_A_0028801	0	0	0	0
GU_A_0028802	1	1	1	1
GU_A_0028803	0	0	0	0
GU_A_0028804	1	0	1	0
GU_A_0028805	0	0	0	0
GU_A_0028806	1	1	1	1
GU_A_0028807	0	0	0	0
GU_A_0028808	1	1	1	1
GU_A_0028809	1	1	1	1
GU_A_0028810	1	1	1	1
GU_A_0028811	1	0	1	0
GU_A_0028812	1	0	1	0
GU_A_0028813	0	0	0	0
GU_A_0028814	0	0	0	0
GU_A_0028815	1	1	1	1
GU_A_0028816	0	0	0	0
GU_A_0028817	1	1	1	1
GU_A_0028818	0	0	0	0
GU_A_0028819	1	0	0	0
GU_A_0028820	1	1	1	1
GU_A_0028821	1	0	1	0
GU_A_0028822	1	1	1	1
GU_A_0028823	0	0	0	0
GU_A_0028824	1	1	1	1
GU_A_0028825	1	1	1	1
GU_A_0028826	0	0	0	0
GU_A_0028828	1	1	1	1
GU_A_0028829	0	0	0	0
GU_A_0028830	1	0	1	0
GU_A_0028831	1	1	1	1
GU_A_0028832	1	0	0	0
GU_A_0028834	0	0	0	0
GU_A_0028835	1	1	1	1
GU_A_0028836	0	0	0	0
GU_A_0028837	1	1	1	1
GU_A_0028838	1	1	1	1
GU_A_0028839	0	0	0	0
GU_A_0028840	1	1	1	1
GU_A_0028841	0	0	0	0
GU_A_0028842	1	0	1	0
GU_A_0028843	1	1	1	1
GU_A_0028844	1	1	1	1
GU_A_0028845	1	0	1	0
GU_A_0028846	0	0	0	0
GU_A_0028847	1	1	1	1
IP_A_0029580	0	0	0	0
IP_A_0029581	0	0	0	0
IP_A_0029582	0	0	0	0
IP_A_0029583	0	0	0	0
IP_A_0029584	0	0	0	0
IP_A_0029585	0	0	0	0
IP_A_0029586	0	0	0	0
IP_A_0029587	0	0	0	0
IP_A_0029588	0	0	0	0
IP_A_0029589	0	0	0	0
IP_A_0029590	0	0	0	0
IP_A_0029591	0	0	0	0
IP_A_0029592	0	0	0	0
IP_A_0029593	0	0	0	0
IP_A_0029594	0	0	0	0
IP_A_0029595	0	0	0	0
IP_A_0029596	0	0	0	0
IP_A_0029597	0	0	0	0
IP_A_0029598	0	0	0	0
IP_A_0029599	0	0	0	0
IP_A_0029600	0	0	0	0
IP_A_0029601	0	0	0	0
IP_A_0029602	0	0	0	0
IP_A_0029603	0	0	0	0
IP_A_0029604	0	0	0	0
IP_A_0029605	0	0	0	0
IP_A_0029606	0	0	0	0
IP_A_0029607	0	0	0	0
IP_A_0029608	0	0	0	0
IP_A_0029609	0	0	0	0
IP_A_0029610	0	0	0	0
IP_A_0029611	0	0	0	0
IP_A_0029612	0	0	0	0
IP_A_0029613	0	0	0	0
IP_A_0029614	0	0	0	0
IP_A_0029615	0	0	0	0
IP_A_0029616	0	0	0	0
IP_A_0029617	0	0	0	0
IP_A_0029618	0	0	0	0
IP_A_0029619	0	0	0	0
IP_A_0029620	0	0	0	0
IP_A_0029621	0	0	0	0
IP_A_0029623	0	0	0	0
IP_A_0029624	0	0	0	0
IP_A_0029626	0	0	0	0
IP_A_0029627	0	0	0	0
IP_A_0029628	0	0	0	0
IP_A_0029629	0	0	0	0
IP_A_0029630	0	0	0	0
IP_A_0029631	0	0	0	0
IP_A_0029632	0	0	0	0
IP_A_0029633	0	0	0	0
IP_A_0029634	0	0	0	0
IP_A_0029635	0	0	0	0
IU_A_0029538	0	0	0	0
IU_A_0029539	0	0	0	0
IU_A_0029540	0	0	0	0
IU_A_0029541	0	0	0	0
IU_A_0029543	0	0	0	0
IU_A_0029545	0	0	0	0
IU_A_0029546	0	0	0	0
IU_A_0029547	0	0	0	0
IU_A_0029548	0	0	0	0
IU_A_0029549	0	0	0	0
IU_A_0029550	0	0	0	0
IU_A_0029552	0	0	0	0
IU_A_0029553	0	0	0	0
IU_A_0029554	0	0	0	0
IU_A_0029556	0	0	0	0
IU_A_0029557	0	0	0	0
IU_A_0029558	0	0	0	0
IU_A_0029559	0	0	0	0
IU_A_0029561	0	0	0	0
IU_A_0029562	0	0	0	0
IU_A_0029563	0	0	0	0
IU_A_0029564	0	0	0	0
IU_A_0029566	0	0	0	0
IU_A_0029567	0	0	0	0
IU_A_0029568	0	0	0	0
IU_A_0029569	0	0	0	0
IU_A_0029570	0	0	0	0
IU_A_0029571	0	0	0	0
IU_A_0029572	0	0	0	0
IU_A_0029573	0	0	0	0
IU_A_0029574	0	0	0	0
IU_A_0029575	0	0	0	0
IU_A_0029577	0	0	0	0
KKI_0050772	0	0	0	0
KKI_0050773	0	0	0	0
KKI_0050774	0	0	0	0
KKI_0050775	0	0	0	0
KKI_0050776	0	0	0	0
KKI_0050777	0	0	0	0
KKI_0050778	0	0	0	0
KKI_0050779	0	0	0	0
KKI_0050780	0	0	0	0
KKI_0050781	0	0	0	0
KKI_0050782	0	0	0	0
KKI_0050783	0	0	0	0
KKI_0050785	0	0	0	0
KKI_0050786	0	0	0	0
KKI_0050787	0	0	0	0
KKI_0050788	0	0	0	0
KKI_0050789	0	0	0	0
KKI_0050791	0	0	0	0
KKI_0050793	0	0	0	0
KKI_0050794	0	0	0	0
KKI_0050797	0	0	0	0
KKI_0050798	0	0	0	0
KKI_0050799	0	0	0	0
KKI_0050800	0	0	0	0
KKI_0050801	0	0	0	0
KKI_0050802	0	0	0	0
KKI_0050803	0	0	0	0
KKI_0050804	0	0	0	0
KKI_0050805	0	0	0	0
KKI_0050806	0	0	0	0
KKI_0050807	0	0	0	0
KKI_0050808	0	0	0	0
KKI_0050809	0	0	0	0
KKI_0050811	0	0	0	0
KKI_0050812	0	0	0	0
KKI_0050813	0	0	0	0
KKI_0050814	0	0	0	0
KKI_0050815	0	0	0	0
KKI_0050816	0	0	0	0
KKI_0050817	0	0	0	0
KKI_0050818	0	0	0	0
KKI_0050819	0	0	0	0
KKI_0050820	0	0	0	0
KKI_0050821	0	0	0	0
KKI_0050822	0	0	0	0
KKI_0050823	0	0	0	0
KKI_0050824	0	0	0	0
KKI_0050825	0	0	0	0
KKI_0050826	0	0	0	0
KKI_A_0029273	1	0	1	0
KKI_A_0029274	1	1	1	1
KKI_A_0029275	1	0	0	0
KKI_A_0029276	0	0	0	0
KKI_A_0029277	1	1	1	1
KKI_A_0029278	0	0	0	0
KKI_A_0029280	1	0	0	0
KKI_A_0029281	1	1	1	1
KKI_A_0029282	1	1	1	1
KKI_A_0029283	0	0	0	0
KKI_A_0029284	1	1	1	1
KKI_A_0029285	0	0	0	0
KKI_A_0029286	1	1	1	1
KKI_A_0029287	0	0	0	0
KKI_A_0029288	1	1	1	1
KKI_A_0029289	0	0	0	0
KKI_A_0029290	0	0	0	0
KKI_A_0029291	1	1	1	1
KKI_A_0029292	1	1	1	1
KKI_A_0029294	0	0	0	0
KKI_A_0029295	0	0	0	0
KKI_A_0029298	0	0	0	0
KKI_A_0029299	0	0	0	0
KKI_A_0029300	0	0	0	0
KKI_A_0029302	0	0	0	0
KKI_A_0029303	1	0	1	0
KKI_A_0029304	0	0	0	0
KKI_A_0029305	1	1	1	1
KKI_A_0029307	0	0	0	0
KKI_A_0029308	1	1	1	1
KKI_A_0029309	0	0	0	0
KKI_A_0029310	1	0	1	0
KKI_A_0029311	1	1	1	1
KKI_A_0029313	1	0	1	0
KKI_A_0029314	0	0	0	0
KKI_A_0029316	1	1	1	1
KKI_A_0029317	1	1	1	1
KKI_A_0029318	0	0	0	0
KKI_A_0029319	0	0	0	0
KKI_A_0029320	0	0	0	0
KKI_A_0029321	1	1	1	1
KKI_A_0029323	1	1	1	1
KKI_A_0029324	0	0	0	0
KKI_A_0029325	0	0	0	0
KKI_A_0029326	1	1	1	1
KKI_A_0029327	1	1	1	1
KKI_A_0029328	1	1	1	1
KKI_A_0029329	0	0	0	0
KKI_A_0029330	1	1	1	1
KKI_A_0029331	0	0	0	0
KKI_A_0029332	1	1	1	1
KKI_A_0029333	0	0	0	0
KKI_A_0029335	0	0	0	0
KKI_A_0029337	0	0	0	0
KKI_A_0029338	1	1	1	1
KKI_A_0029339	0	0	0	0
KKI_A_0029340	1	0	1	0
KKI_A_0029341	1	1	1	1
KKI_A_0029342	0	0	0	0
KKI_A_0029343	0	0	0	0
KKI_A_0029345	1	1	1	1
KKI_A_0029346	0	0	0	0
KKI_A_0029347	1	1	1	1
KKI_A_0029348	0	0	0	0
KKI_A_0029349	1	1	1	1
KKI_A_0029350	1	1	1	1
KKI_A_0029351	0	0	0	0
KKI_A_0029352	0	0	0	0
KKI_A_0029353	0	0	0	0
KKI_A_0029354	1	1	1	1
KKI_A_0029355	0	0	0	0
KKI_A_0029356	0	0	0	0
KKI_A_0029357	0	0	0	0
KKI_A_0029358	0	0	0	0
KKI_A_0029359	1	1	1	1
KKI_A_0029360	1	1	1	1
KKI_A_0029361	1	1	1	1
KKI_A_0029362	0	0	0	0
KKI_A_0029363	0	0	0	0
KKI_A_0029365	0	0	0	0
KKI_A_0029367	1	0	1	0
KKI_A_0029368	1	1	1	1
KKI_A_0029369	0	0	0	0
KKI_A_0029370	0	0	0	0
KKI_A_0029372	1	1	1	1
KKI_A_0029373	1	1	1	1
KKI_A_0029374	0	0	0	0
KKI_A_0029376	0	0	0	0
KKI_A_0029377	0	0	0	0
KKI_A_0029378	1	1	1	1
KKI_A_0029379	1	1	1	1
KKI_A_0029380	0	0	0	0
KKI_A_0029381	1	1	1	1
KKI_A_0029382	1	1	1	1
KKI_A_0029383	0	0	0	0
KKI_A_0029384	1	1	1	1
KKI_A_0029385	1	1	1	1
KKI_A_0029386	1	0	1	0
KKI_A_0029387	1	0	1	0
KKI_A_0029388	1	1	1	1
KKI_A_0029389	1	1	1	1
KKI_A_0029390	1	0	1	0
KKI_A_0029391	1	0	0	0
KKI_A_0029392	1	1	1	1
KKI_A_0029393	1	1	1	1
KKI_A_0029394	1	1	1	1
KKI_A_0029395	0	0	0	0
KKI_A_0029396	1	1	1	1
KKI_A_0029397	1	1	1	1
KKI_A_0029398	0	0	0	0
KKI_A_0029399	1	1	1	1
KKI_A_0029400	1	1	1	1
KKI_A_0029401	1	0	1	0
KKI_A_0029402	0	0	0	0
KKI_A_0029403	1	1	1	1
KKI_A_0029404	1	0	1	0
KKI_A_0029408	0	0	0	0
KKI_A_0029410	1	1	0	0
KKI_A_0029412	0	0	0	0
KKI_A_0029413	1	0	0	0
KKI_A_0029414	1	1	1	1
KKI_A_0029415	0	0	0	0
KKI_A_0029417	1	0	0	0
KKI_A_0029418	0	0	0	0
KKI_A_0029419	0	0	0	0
KKI_A_0029420	0	0	0	0
KKI_A_0029421	0	0	0	0
KKI_A_0029422	0	0	0	0
KKI_A_0029423	1	1	1	1
KKI_A_0029424	1	0	1	0
KKI_A_0029425	1	1	1	1
KKI_A_0029427	0	0	0	0
KKI_A_0029428	1	0	0	0
KKI_A_0029429	0	0	0	0
KKI_A_0029430	1	1	1	1
KKI_A_0029431	1	1	1	1
KKI_A_0029433	1	1	0	0
KKI_A_0029434	0	0	0	0
KKI_A_0029435	0	0	0	0
KKI_A_0029436	0	0	0	0
KKI_A_0029437	0	0	0	0
KKI_A_0029439	0	0	0	0
KKI_A_0029440	0	0	0	0
KKI_A_0029442	0	0	0	0
KKI_A_0029443	1	1	1	1
KKI_A_0029444	0	0	0	0
KKI_A_0029445	0	0	0	0
KKI_A_0029446	0	0	0	0
KKI_A_0029447	1	1	1	1
KKI_A_0029448	0	0	0	0
KKI_A_0029449	0	0	0	0
KKI_A_0029450	0	0	0	0
KKI_A_0029451	1	1	1	1
KKI_A_0029452	1	1	0	0
KKI_A_0029454	0	0	0	0
KKI_A_0029455	0	0	0	0
KKI_A_0029456	1	1	1	1
KKI_A_0029457	0	0	0	0
KKI_A_0029458	0	0	0	0
KKI_A_0029459	0	0	0	0
KKI_A_0029460	0	0	0	0
KKI_A_0029461	1	1	0	0
KKI_A_0029462	0	0	0	0
KKI_A_0029463	0	0	0	0
KKI_A_0029464	1	1	1	1
KKI_A_0029465	1	1	1	1
KKI_A_0029467	1	1	1	1
KKI_A_0029468	0	0	0	0
KKI_A_0029469	1	0	1	0
KKI_A_0029470	0	0	0	0
KKI_A_0029471	1	1	1	1
KKI_A_0029472	1	1	1	1
KKI_A_0029473	1	0	1	0
KKI_A_0029474	0	0	0	0
KKI_A_0029475	1	1	1	1
KKI_A_0029476	1	1	1	1
KKI_A_0029477	0	0	0	0
KKI_A_0029478	0	0	0	0
KKI_A_0029479	1	1	1	1
KKI_A_0029480	0	0	0	0
KKI_A_0029481	0	0	0	0
KKI_A_0029482	1	1	1	1
KKI_A_0029483	0	0	0	0
KKI_A_0029484	0	0	0	0
KKI_A_0029485	0	0	0	0
KUL_3_0029656	0	0	0	0
KUL_3_0029657	0	0	0	0
KUL_3_0029658	0	0	0	0
KUL_3_0029659	0	0	0	0
KUL_3_0029660	0	0	0	0
KUL_3_0029661	0	0	0	0
KUL_3_0029662	0	0	0	0
KUL_3_0029664	0	0	0	0
KUL_3_0029666	0	0	0	0
KUL_3_0029667	0	0	0	0
KUL_3_0029668	0	0	0	0
KUL_3_0029669	0	0	0	0
KUL_3_0029670	0	0	0	0
KUL_3_0029671	0	0	0	0
KUL_3_0029674	0	0	0	0
KUL_3_0029675	0	0	0	0
KUL_3_0029676	0	0	0	0
KUL_3_0029677	0	0	0	0
KUL_3_0029678	0	0	0	0
KUL_3_0029679	0	0	0	0
KUL_3_0029794	0	0	0	0
KUL_3_0029795	0	0	0	0
KUL_3_0029796	0	0	0	0
KUL_3_0029797	0	0	0	0
KUL_3_0029798	0	0	0	0
KUL_3_0029799	0	0	0	0
KUL_3_0029800	0	0	0	0
LEUVEN_A_0050682	0	0	0	0
LEUVEN_A_0050683	0	0	0	0
LEUVEN_A_0050685	0	0	0	0
LEUVEN_A_0050686	0	0	0	0
LEUVEN_A_0050687	0	0	0	0
LEUVEN_A_0050688	0	0	0	0
LEUVEN_A_0050689	0	0	0	0
LEUVEN_A_0050690	0	0	0	0
LEUVEN_A_0050691	0	0	0	0
LEUVEN_A_0050692	0	0	0	0
LEUVEN_A_0050693	0	0	0	0
LEUVEN_A_0050694	0	0	0	0
LEUVEN_A_0050695	0	0	0	0
LEUVEN_A_0050696	0	0	0	0
LEUVEN_A_0050697	0	0	0	0
LEUVEN_A_0050698	0	0	0	0
LEUVEN_A_0050699	0	0	0	0
LEUVEN_A_0050700	0	0	0	0
LEUVEN_A_0050701	0	0	0	0
LEUVEN_A_0050702	0	0	0	0
LEUVEN_A_0050703	0	0	0	0
LEUVEN_A_0050704	0	0	0	0
LEUVEN_A_0050705	0	0	0	0
LEUVEN_A_0050706	0	0	0	0
LEUVEN_A_0050707	0	0	0	0
LEUVEN_A_0050708	0	0	0	0
LEUVEN_A_0050709	0	0	0	0
LEUVEN_A_0050710	0	0	0	0
LEUVEN_A_0050711	0	0	0	0
LEUVEN_B_0050722	0	0	0	0
LEUVEN_B_0050723	0	0	0	0
LEUVEN_B_0050724	0	0	0	0
LEUVEN_B_0050725	0	0	0	0
LEUVEN_B_0050726	0	0	0	0
LEUVEN_B_0050727	0	0	0	0
LEUVEN_B_0050728	0	0	0	0
LEUVEN_B_0050730	0	0	0	0
LEUVEN_B_0050731	0	0	0	0
LEUVEN_B_0050732	0	0	0	0
LEUVEN_B_0050733	0	0	0	0
LEUVEN_B_0050734	0	0	0	0
LEUVEN_B_0050735	0	0	0	0
LEUVEN_B_0050737	0	0	0	0
LEUVEN_B_0050738	0	0	0	0
LEUVEN_B_0050739	0	0	0	0
LEUVEN_B_0050740	0	0	0	0
LEUVEN_B_0050741	0	0	0	0
LEUVEN_B_0050742	0	0	0	0
LEUVEN_B_0050743	0	0	0	0
LEUVEN_B_0050744	0	0	0	0
LEUVEN_B_0050745	0	0	0	0
LEUVEN_B_0050746	0	0	0	0
LEUVEN_B_0050747	0	0	0	0
LEUVEN_B_0050748	0	0	0	0
LEUVEN_B_0050749	0	0	0	0
LEUVEN_B_0050750	0	0	0	0
LEUVEN_B_0050751	0	0	0	0
LEUVEN_B_0050752	0	0	0	0
LEUVEN_B_0050753	0	0	0	0
LEUVEN_B_0050754	0	0	0	0
LEUVEN_B_0050755	0	0	0	0
LEUVEN_B_0050756	0	0	0	0
LEUVEN_B_0050757	0	0	0	0
MAX_MUN_0051318	0	0	0	0
MAX_MUN_0051319	0	0	0	0
MAX_MUN_0051320	0	0	0	0
MAX_MUN_0051321	0	0	0	0
MAX_MUN_0051322	0	0	0	0
MAX_MUN_0051323	0	0	0	0
MAX_MUN_0051324	0	0	0	0
MAX_MUN_0051325	0	0	0	0
MAX_MUN_0051326	0	0	0	0
MAX_MUN_0051327	0	0	0	0
MAX_MUN_0051328	0	0	0	0
MAX_MUN_0051329	0	0	0	0
MAX_MUN_0051330	0	0	0	0
MAX_MUN_0051331	0	0	0	0
MAX_MUN_0051332	0	0	0	0
MAX_MUN_0051333	0	0	0	0
MAX_MUN_0051334	0	0	0	0
MAX_MUN_0051335	0	0	0	0
MAX_MUN_0051336	0	0	0	0
MAX_MUN_0051338	0	0	0	0
MAX_MUN_0051339	0	0	0	0
MAX_MUN_0051340	0	0	0	0
MAX_MUN_0051341	0	0	0	0
MAX_MUN_0051342	0	0	0	0
MAX_MUN_0051343	0	0	0	0
MAX_MUN_0051344	0	0	0	0
MAX_MUN_0051345	0	0	0	0
MAX_MUN_0051346	0	0	0	0
MAX_MUN_0051347	0	0	0	0
MAX_MUN_0051348	0	0	0	0
MAX_MUN_0051349	0	0	0	0
MAX_MUN_0051350	0	0	0	0
MAX_MUN_0051351	0	0	0	0
MAX_MUN_0051352	0	0	0	0
MAX_MUN_0051353	0	0	0	0
MAX_MUN_0051354	0	0	0	0
MAX_MUN_0051355	0	0	0	0
MAX_MUN_0051356	0	0	0	0
MAX_MUN_0051357	0	0	0	0
MAX_MUN_0051358	0	0	0	0
MAX_MUN_0051359	0	0	0	0
MAX_MUN_0051360	0	0	0	0
MAX_MUN_0051361	0	0	0	0
MAX_MUN_0051362	0	0	0	0
MAX_MUN_0051363	0	0	0	0
MAX_MUN_0051364	0	0	0	0
MAX_MUN_0051365	0	0	0	0
MAX_MUN_0051366	0	0	0	0
MAX_MUN_0051367	0	0	0	0
MAX_MUN_0051368	0	0	0	0
MAX_MUN_0051369	0	0	0	0
MAX_MUN_0051370	0	0	0	0
MAX_MUN_0051371	0	0	0	0
MAX_MUN_0051372	0	0	0	0
MAX_MUN_0051373	0	0	0	0
MAX_MUN_0051606	0	0	0	0
MAX_MUN_0051607	0	0	0	0
NYU_0050952	0	0	0	0
NYU_0050953	0	0	0	0
NYU_0050954	0	0	0	0
NYU_0050956	0	0	0	0
NYU_0050957	0	0	0	0
NYU_0050958	0	0	0	0
NYU_0050960	0	0	0	0
NYU_0050962	0	0	0	0
NYU_0050964	1	1	1	1
NYU_0050965	1	1	1	1
NYU_0050966	1	0	0	0
NYU_0050967	1	1	1	1
NYU_0050968	1	1	1	1
NYU_0050969	1	0	1	0
NYU_0050970	1	0	1	0
NYU_0050971	1	0	0	0
NYU_0050972	1	1	1	1
NYU_0050973	1	1	1	1
NYU_0050974	1	1	1	1
NYU_0050975	1	1	1	1
NYU_0050976	1	1	1	1
NYU_0050977	1	0	1	0
NYU_0050978	1	1	1	1
NYU_0050979	0	0	0	0
NYU_0050980	1	0	1	0
NYU_0050981	1	1	1	1
NYU_0050982	1	1	1	1
NYU_0050983	1	1	1	1
NYU_0050984	0	0	0	0
NYU_0050985	1	1	1	1
NYU_0050986	0	0	0	0
NYU_0050987	1	0	1	0
NYU_0050988	1	0	0	0
NYU_0050989	1	1	1	1
NYU_0050990	1	1	1	1
NYU_0050991	1	1	1	1
NYU_0050992	1	1	1	1
NYU_0050993	1	1	1	1
NYU_0050994	1	1	1	1
NYU_0050995	1	1	1	1
NYU_0050996	1	1	1	1
NYU_0050997	1	1	1	1
NYU_0050998	1	1	1	1
NYU_0050999	1	1	1	1
NYU_0051000	1	1	1	1
NYU_0051001	0	0	0	0
NYU_0051002	1	0	0	0
NYU_0051003	1	0	1	0
NYU_0051006	1	1	1	1
NYU_0051007	1	1	1	1
NYU_0051008	1	0	0	0
NYU_0051009	1	1	1	1
NYU_0051010	1	0	0	0
NYU_0051011	1	0	0	0
NYU_0051012	1	1	0	0
NYU_0051013	1	0	1	0
NYU_0051014	1	1	1	1
NYU_0051015	1	0	1	0
NYU_0051016	1	0	1	0
NYU_0051017	1	0	1	0
NYU_0051018	1	0	1	0
NYU_0051019	1	0	1	0
NYU_0051020	0	0	0	0
NYU_0051021	1	0	1	0
NYU_0051023	1	0	1	0
NYU_0051024	1	0	1	0
NYU_0051025	1	1	1	1
NYU_0051026	1	1	1	1
NYU_0051027	1	0	1	0
NYU_0051028	1	0	1	0
NYU_0051029	1	0	1	0
NYU_0051030	1	0	0	0
NYU_0051032	1	0	0	0
NYU_0051033	1	1	0	0
NYU_0051034	1	1	0	0
NYU_0051035	0	0	0	0
NYU_0051036	0	0	0	0
NYU_0051038	0	0	0	0
NYU_0051039	0	0	0	0
NYU_0051040	0	0	0	0
NYU_0051041	0	0	0	0
NYU_0051042	0	0	0	0
NYU_0051046	0	0	0	0
NYU_0051047	0	0	0	0
NYU_0051048	0	0	0	0
NYU_0051049	0	0	0	0
NYU_0051050	0	0	0	0
NYU_0051051	0	0	0	0
NYU_0051052	0	0	0	0
NYU_0051054	0	0	0	0
NYU_0051055	0	0	0	0
NYU_0051056	0	0	0	0
NYU_0051057	0	0	0	0
NYU_0051058	0	0	0	0
NYU_0051061	0	0	0	0
NYU_0051062	0	0	0	0
NYU_0051063	0	0	0	0
NYU_0051064	1	0	0	0
NYU_0051065	1	0	0	0
NYU_0051066	1	0	0	0
NYU_0051067	1	0	0	0
NYU_0051068	1	0	0	0
NYU_0051069	1	0	1	0
NYU_0051070	1	0	0	0
NYU_0051071	1	0	0	0
NYU_0051072	1	0	0	0
NYU_0051073	0	0	0	0
NYU_0051074	1	0	0	0
NYU_0051075	1	0	0	0
NYU_0051076	1	0	0	0
NYU_0051077	1	0	0	0
NYU_0051078	1	0	1	0
NYU_0051079	0	0	0	0
NYU_0051080	1	0	1	0
NYU_0051081	1	0	1	0
NYU_0051082	1	0	1	0
NYU_0051083	1	0	1	0
NYU_0051084	1	1	1	1
NYU_0051085	1	1	1	1
NYU_0051086	1	1	1	1
NYU_0051087	1	1	1	1
NYU_0051088	1	1	1	1
NYU_0051089	1	1	1	1
NYU_0051090	1	1	1	1
NYU_0051091	1	1	1	1
NYU_0051093	1	1	1	1
NYU_0051094	1	1	1	1
NYU_0051095	1	1	1	1
NYU_0051096	1	1	1	1
NYU_0051097	1	1	1	1
NYU_0051098	1	1	1	1
NYU_0051099	1	1	1	1
NYU_0051100	1	1	1	1
NYU_0051101	1	1	1	1
NYU_0051102	1	1	1	1
NYU_0051103	1	1	1	1
NYU_0051104	0	0	0	0
NYU_0051105	1	1	1	1
NYU_0051106	1	1	1	1
NYU_0051107	1	1	1	1
NYU_0051108	1	1	1	1
NYU_0051109	1	1	1	1
NYU_0051110	0	0	0	0
NYU_0051111	1	1	1	1
NYU_0051112	1	1	1	1
NYU_0051113	1	0	1	0
NYU_0051114	1	0	1	0
NYU_0051115	1	0	1	0
NYU_0051116	1	0	1	0
NYU_0051117	1	0	1	0
NYU_0051118	1	0	1	0
NYU_0051119	1	0	1	0
NYU_0051120	1	1	1	1
NYU_0051121	1	1	1	1
NYU_0051122	1	1	1	1
NYU_0051123	1	1	1	1
NYU_0051124	1	1	1	1
NYU_0051125	1	1	1	1
NYU_0051126	1	1	1	1
NYU_0051127	1	1	0	0
NYU_0051128	0	0	0	0
NYU_0051129	1	1	1	1
NYU_0051130	1	1	1	1
NYU_0051131	1	1	1	1
NYU_0051146	1	0	1	0
NYU_0051147	0	0	0	0
NYU_0051148	1	0	1	0
NYU_0051149	1	0	1	0
NYU_0051150	1	0	1	0
NYU_0051151	1	0	1	0
NYU_0051152	1	0	1	0
NYU_0051153	1	0	1	0
NYU_0051154	1	0	1	0
NYU_0051155	1	0	1	0
NYU_0051156	1	0	1	0
NYU_0051159	1	0	0	0
NYU_A_0029178	1	1	0	0
NYU_A_0029179	1	0	1	0
NYU_A_0029180	1	0	0	0
NYU_A_0029181	1	0	1	0
NYU_A_0029182	0	0	0	0
NYU_A_0029183	1	0	1	0
NYU_A_0029184	1	0	1	0
NYU_A_0029185	1	0	1	0
NYU_A_0029186	1	0	1	0
NYU_A_0029187	0	0	0	0
NYU_A_0029188	1	0	1	0
NYU_A_0029189	0	0	0	0
NYU_A_0029190	1	1	1	1
NYU_A_0029191	1	1	1	1
NYU_A_0029192	1	1	1	1
NYU_A_0029193	1	0	1	0
NYU_A_0029194	0	0	0	0
NYU_A_0029195	1	0	1	0
NYU_A_0029196	1	0	0	0
NYU_A_0029197	1	1	1	1
NYU_A_0029198	1	1	1	1
NYU_A_0029199	1	0	1	0
NYU_A_0029200	1	1	1	1
NYU_A_0029201	1	0	0	0
NYU_A_0029202	1	0	1	0
NYU_A_0029203	1	0	1	0
NYU_A_0029204	1	1	1	1
NYU_A_0029205	1	0	1	0
NYU_A_0029206	1	0	1	0
NYU_A_0029207	1	1	1	1
NYU_A_0029208	1	0	1	0
NYU_A_0029209	1	0	1	0
NYU_A_0029210	1	0	1	0
NYU_A_0029211	1	1	1	1
NYU_A_0029212	0	0	0	0
NYU_A_0029213	0	0	0	0
NYU_A_0029214	1	0	1	0
NYU_A_0029215	1	0	0	0
NYU_A_0029216	1	0	1	0
NYU_A_0029217	0	0	0	0
NYU_A_0029218	1	0	1	0
NYU_A_0029219	0	0	0	0
NYU_A_0029220	1	0	1	0
NYU_A_0029221	0	0	0	0
NYU_A_0029222	0	0	0	0
NYU_A_0029223	1	0	0	0
NYU_A_0029224	0	0	0	0
NYU_A_0029225	1	0	1	0
NYU_A_0029226	0	0	0	0
NYU_A_0029227	1	0	1	0
NYU_A_0029228	1	1	1	1
NYU_A_0029229	0	0	0	0
NYU_A_0029230	1	0	1	0
NYU_A_0029231	1	0	1	0
NYU_A_0029232	1	0	1	0
NYU_A_0029233	1	1	1	1
NYU_A_0029234	1	1	1	1
NYU_A_0029235	1	1	1	1
NYU_A_0029236	1	0	1	0
NYU_A_0029237	1	1	1	1
NYU_A_0029238	1	0	1	0
NYU_A_0029239	1	1	1	1
NYU_A_0029240	1	1	1	1
NYU_A_0029241	1	0	1	0
NYU_A_0029242	0	0	0	0
NYU_A_0029243	1	1	1	1
NYU_A_0029244	1	0	1	0
NYU_A_0029245	1	1	1	1
NYU_A_0029246	1	1	1	1
NYU_A_0029247	1	1	1	1
NYU_A_0029248	1	1	1	1
NYU_A_0029249	1	1	1	1
NYU_A_0029250	1	1	1	1
NYU_A_0029251	1	1	1	1
NYU_A_0029252	1	1	1	1
NYU_A_0029253	0	0	0	0
NYU_A_0029254	1	0	1	0
NYU_B_0029150	0	0	0	0
NYU_B_0029151	0	0	0	0
NYU_B_0029152	0	0	0	0
NYU_B_0029154	0	0	0	0
NYU_B_0029155	0	0	0	0
NYU_B_0029157	0	0	0	0
NYU_B_0029158	0	0	0	0
NYU_B_0029159	0	0	0	0
NYU_B_0029160	0	0	0	0
NYU_B_0029161	0	0	0	0
NYU_B_0029162	0	0	0	0
NYU_B_0029163	0	0	0	0
NYU_B_0029164	0	0	0	0
NYU_B_0029165	0	0	0	0
NYU_B_0029166	0	0	0	0
NYU_B_0029167	0	0	0	0
NYU_B_0029169	0	0	0	0
NYU_B_0029170	0	0	0	0
NYU_B_0029172	0	0	0	0
NYU_B_0029173	0	0	0	0
NYU_B_0029174	0	0	0	0
NYU_B_0029176	0	0	0	0
OHSU_0050142	0	0	0	0
OHSU_0050143	0	0	0	0
OHSU_0050144	0	0	0	0
OHSU_0050145	0	0	0	0
OHSU_0050146	0	0	0	0
OHSU_0050147	0	0	0	0
OHSU_0050148	0	0	0	0
OHSU_0050149	0	0	0	0
OHSU_0050150	0	0	0	0
OHSU_0050152	0	0	0	0
OHSU_0050153	0	0	0	0
OHSU_0050155	0	0	0	0
OHSU_0050156	0	0	0	0
OHSU_0050157	0	0	0	0
OHSU_0050158	0	0	0	0
OHSU_0050159	0	0	0	0
OHSU_0050160	0	0	0	0
OHSU_0050161	0	0	0	0
OHSU_0050162	0	0	0	0
OHSU_0050163	0	0	0	0
OHSU_0050164	0	0	0	0
OHSU_0050165	0	0	0	0
OHSU_0050166	0	0	0	0
OHSU_0050167	0	0	0	0
OHSU_0050168	0	0	0	0
OHSU_0050169	0	0	0	0
OHSU_0050170	0	0	0	0
OHSU_0050171	0	0	0	0
OHSU_A_0028920	1	1	1	1
OHSU_A_0028924	1	1	1	1
OHSU_A_0028925	1	1	1	1
OHSU_A_0028926	1	1	1	1
OHSU_A_0028927	1	1	1	1
OHSU_A_0028930	1	1	1	1
OHSU_A_0028931	1	1	1	1
OHSU_A_0028933	1	1	0	0
OHSU_A_0028934	0	0	0	0
OHSU_A_0028935	1	1	1	1
OHSU_A_0028936	1	1	1	1
OHSU_A_0028937	1	1	1	1
OHSU_A_0028938	1	1	1	1
OHSU_A_0028939	0	0	0	0
OHSU_A_0028940	1	0	1	0
OHSU_A_0028941	1	1	1	1
OHSU_A_0028942	0	0	0	0
OHSU_A_0028943	0	0	0	0
OHSU_A_0028944	0	0	0	0
OHSU_A_0028945	0	0	0	0
OHSU_A_0028946	0	0	0	0
OHSU_A_0028947	0	0	0	0
OHSU_A_0028948	1	1	1	1
OHSU_A_0028949	1	1	0	0
OHSU_A_0028950	0	0	0	0
OHSU_A_0028951	1	1	1	1
OHSU_A_0028952	1	1	1	1
OHSU_A_0028953	0	0	0	0
OHSU_A_0028954	0	0	0	0
OHSU_A_0028955	1	1	1	1
OHSU_A_0028956	1	1	1	1
OHSU_A_0028957	1	1	1	1
OHSU_A_0028958	1	1	1	1
OHSU_A_0028960	1	1	1	1
OHSU_A_0028961	1	1	1	1
OHSU_A_0028962	0	0	0	0
OHSU_A_0028963	1	1	1	1
OHSU_A_0028964	1	1	1	1
OHSU_A_0028965	1	1	0	0
OHSU_A_0028966	1	1	1	1
OHSU_A_0028967	1	1	1	1
OHSU_A_0028968	0	0	0	0
OHSU_A_0028969	1	1	1	1
OHSU_A_0028970	1	0	1	0
OHSU_A_0028971	0	0	0	0
OHSU_A_0028972	1	1	1	1
OHSU_A_0028973	0	0	0	0
OHSU_A_0028974	1	1	1	1
OHSU_A_0028975	1	1	1	1
OHSU_A_0028976	0	0	0	0
OHSU_A_0028977	0	0	0	0
OHSU_A_0028978	1	0	1	0
OHSU_A_0028979	1	1	1	1
OHSU_A_0028980	0	0	0	0
OHSU_A_0028981	1	1	1	1
OHSU_A_0028982	1	1	1	1
OHSU_A_0028983	1	0	1	0
OHSU_A_0028984	1	1	1	1
OHSU_A_0028985	1	1	1	1
OHSU_A_0028986	1	1	1	1
OHSU_A_0028987	1	1	1	1
OHSU_A_0028988	0	0	0	0
OHSU_A_0028989	1	1	1	1
OHSU_A_0028990	1	0	1	0
OHSU_A_0028991	0	0	0	0
OHSU_A_0028992	1	1	0	0
OHSU_A_0028993	1	1	1	1
OHSU_A_0028994	0	0	0	0
OHSU_A_0028995	1	0	1	0
OHSU_A_0028996	1	1	1	1
OHSU_A_0028997	0	0	0	0
OHSU_A_0028998	1	1	1	1
OHSU_A_0028999	1	1	1	1
OHSU_A_0029000	0	0	0	0
OHSU_A_0029001	0	0	0	0
OHSU_A_0029002	1	1	1	1
OHSU_A_0029003	1	1	1	1
OHSU_A_0029004	0	0	0	0
OHSU_A_0029005	0	0	0	0
OHSU_A_0030155	1	1	1	1
OHSU_A_0030156	0	0	0	0
OHSU_A_0030157	0	0	0	0
OHSU_A_0030158	0	0	0	0
OHSU_A_0030159	1	1	1	1
OHSU_A_0030160	1	1	1	1
OHSU_A_0030161	0	0	0	0
OHSU_A_0030162	0	0	0	0
OHSU_A_0030163	0	0	0	0
OHSU_A_0030164	0	0	0	0
OHSU_A_0030165	0	0	0	0
OHSU_A_0030166	0	0	0	0
OHSU_A_0030167	0	0	0	0
OILH_B_0028675	0	0	0	0
OILH_B_0028676	0	0	0	0
OILH_B_0028677	0	0	0	0
OILH_B_0028679	0	0	0	0
OILH_B_0028681	0	0	0	0
OILH_B_0028683	0	0	0	0
OILH_B_0028684	0	0	0	0
OILH_B_0028685	0	0	0	0
OILH_B_0028687	0	0	0	0
OILH_B_0028688	0	0	0	0
OILH_B_0028690	0	0	0	0
OILH_B_0028691	0	0	0	0
OILH_B_0028692	0	0	0	0
OILH_B_0028693	0	0	0	0
OILH_B_0028694	0	0	0	0
OILH_B_0028695	0	0	0	0
OILH_B_0028696	0	0	0	0
OILH_B_0028697	0	0	0	0
OILH_B_0028698	0	0	0	0
OILH_B_0028701	0	0	0	0
OILH_B_0028702	0	0	0	0
OILH_B_0028704	0	0	0	0
OILH_B_0028705	0	0	0	0
OILH_B_0028707	0	0	0	0
OILH_B_0028709	0	0	0	0
OILH_B_0028710	0	0	0	0
OILH_B_0028712	0	0	0	0
OILH_B_0028715	0	0	0	0
OILH_B_0028716	0	0	0	0
OILH_B_0028717	0	0	0	0
OILH_B_0028718	0	0	0	0
OILH_B_0028719	0	0	0	0
OILH_B_0028720	0	0	0	0
OILH_B_0028721	0	0	0	0
OILH_B_0028723	0	0	0	0
OILH_B_0028724	0	0	0	0
OILH_B_0028725	0	0	0	0
OILH_B_0028726	0	0	0	0
OILH_B_0028727	0	0	0	0
OILH_B_0028728	0	0	0	0
OILH_B_0028729	0	0	0	0
OILH_B_0028730	0	0	0	0
OILH_B_0028732	0	0	0	0
OILH_B_0028733	0	0	0	0
OLIN_0050102	0	0	0	0
OLIN_0050103	0	0	0	0
OLIN_0050104	0	0	0	0
OLIN_0050105	0	0	0	0
OLIN_0050106	0	0	0	0
OLIN_0050107	0	0	0	0
OLIN_0050108	0	0	0	0
OLIN_0050109	0	0	0	0
OLIN_0050110	0	0	0	0
OLIN_0050111	0	0	0	0
OLIN_0050112	0	0	0	0
OLIN_0050113	0	0	0	0
OLIN_0050114	0	0	0	0
OLIN_0050115	0	0	0	0
OLIN_0050116	0	0	0	0
OLIN_0050117	0	0	0	0
OLIN_0050118	0	0	0	0
OLIN_0050119	0	0	0	0
OLIN_0050120	0	0	0	0
OLIN_0050121	0	0	0	0
OLIN_0050122	0	0	0	0
OLIN_0050123	0	0	0	0
OLIN_0050124	0	0	0	0
OLIN_0050125	0	0	0	0
OLIN_0050126	0	0	0	0
OLIN_0050127	0	0	0	0
OLIN_0050128	0	0	0	0
OLIN_0050129	0	0	0	0
OLIN_0050130	0	0	0	0
OLIN_0050131	0	0	0	0
OLIN_0050132	0	0	0	0
OLIN_0050133	0	0	0	0
OLIN_0050134	0	0	0	0
OLIN_0050135	0	0	0	0
OLIN_0050136	0	0	0	0
OLIN_0050137	0	0	0	0
PITT_0050002	0	0	0	0
PITT_0050003	0	0	0	0
PITT_0050004	0	0	0	0
PITT_0050005	0	0	0	0
PITT_0050006	0	0	0	0
PITT_0050007	0	0	0	0
PITT_0050008	0	0	0	0
PITT_0050009	0	0	0	0
PITT_0050010	0	0	0	0
PITT_0050011	0	0	0	0
PITT_0050012	0	0	0	0
PITT_0050013	0	0	0	0
PITT_0050014	0	0	0	0
PITT_0050015	0	0	0	0
PITT_0050016	0	0	0	0
PITT_0050017	0	0	0	0
PITT_0050019	0	0	0	0
PITT_0050020	0	0	0	0
PITT_0050022	0	0	0	0
PITT_0050023	0	0	0	0
PITT_0050024	0	0	0	0
PITT_0050025	0	0	0	0
PITT_0050026	0	0	0	0
PITT_0050027	0	0	0	0
PITT_0050028	0	0	0	0
PITT_0050029	0	0	0	0
PITT_0050030	0	0	0	0
PITT_0050031	0	0	0	0
PITT_0050032	0	0	0	0
PITT_0050033	0	0	0	0
PITT_0050034	0	0	0	0
PITT_0050035	0	0	0	0
PITT_0050036	0	0	0	0
PITT_0050037	0	0	0	0
PITT_0050038	0	0	0	0
PITT_0050039	0	0	0	0
PITT_0050040	0	0	0	0
PITT_0050041	0	0	0	0
PITT_0050042	0	0	0	0
PITT_0050043	0	0	0	0
PITT_0050044	0	0	0	0
PITT_0050045	0	0	0	0
PITT_0050046	0	0	0	0
PITT_0050047	0	0	0	0
PITT_0050048	0	0	0	0
PITT_0050049	0	0	0	0
PITT_0050050	0	0	0	0
PITT_0050051	0	0	0	0
PITT_0050052	0	0	0	0
PITT_0050053	0	0	0	0
PITT_0050054	0	0	0	0
PITT_0050055	0	0	0	0
PITT_0050056	0	0	0	0
PITT_0050057	0	0	0	0
PITT_0050058	0	0	0	0
PITT_0050059	0	0	0	0
PITT_0050060	0	0	0	0
SBL_0051556	0	0	0	0
SBL_0051557	0	0	0	0
SBL_0051558	0	0	0	0
SBL_0051559	0	0	0	0
SBL_0051560	0	0	0	0
SBL_0051561	0	0	0	0
SBL_0051562	0	0	0	0
SBL_0051563	0	0	0	0
SBL_0051564	0	0	0	0
SBL_0051565	0	0	0	0
SBL_0051566	0	0	0	0
SBL_0051567	0	0	0	0
SBL_0051568	0	0	0	0
SBL_0051569	0	0	0	0
SBL_0051570	0	0	0	0
SBL_0051571	0	0	0	0
SBL_0051572	0	0	0	0
SBL_0051573	0	0	0	0
SBL_0051574	0	0	0	0
SBL_0051575	0	0	0	0
SBL_0051576	0	0	0	0
SBL_0051577	0	0	0	0
SBL_0051578	0	0	0	0
SBL_0051579	0	0	0	0
SBL_0051580	0	0	0	0
SBL_0051581	0	0	0	0
SBL_0051582	0	0	0	0
SBL_0051583	0	0	0	0
SBL_0051584	0	0	0	0
SBL_0051585	0	0	0	0
SDSU_0050182	0	0	0	0
SDSU_0050183	0	0	0	0
SDSU_0050184	0	0	0	0
SDSU_0050185	0	0	0	0
SDSU_0050186	0	0	0	0
SDSU_0050187	0	0	0	0
SDSU_0050188	0	0	0	0
SDSU_0050189	0	0	0	0
SDSU_0050190	0	0	0	0
SDSU_0050191	0	0	0	0
SDSU_0050192	0	0	0	0
SDSU_0050193	0	0	0	0
SDSU_0050194	0	0	0	0
SDSU_0050195	0	0	0	0
SDSU_0050196	0	0	0	0
SDSU_0050198	0	0	0	0
SDSU_0050199	0	0	0	0
SDSU_0050200	0	0	0	0
SDSU_0050202	0	0	0	0
SDSU_0050203	0	0	0	0
SDSU_0050204	0	0	0	0
SDSU_0050205	0	0	0	0
SDSU_0050206	0	0	0	0
SDSU_0050207	0	0	0	0
SDSU_0050208	0	0	0	0
SDSU_0050209	0	0	0	0
SDSU_0050210	0	0	0	0
SDSU_0050211	0	0	0	0
SDSU_0050212	0	0	0	0
SDSU_0050213	0	0	0	0
SDSU_0050214	0	0	0	0
SDSU_0050215	0	0	0	0
SDSU_0050216	0	0	0	0
SDSU_0050217	0	0	0	0
SDSU_A_0028852	0	0	0	0
SDSU_A_0028853	0	0	0	0
SDSU_A_0028854	0	0	0	0
SDSU_A_0028855	0	0	0	0
SDSU_A_0028856	0	0	0	0
SDSU_A_0028857	0	0	0	0
SDSU_A_0028858	0	0	0	0
SDSU_A_0028859	0	0	0	0
SDSU_A_0028860	0	0	0	0
SDSU_A_0028861	0	0	0	0
SDSU_A_0028862	0	0	0	0
SDSU_A_0028863	0	0	0	0
SDSU_A_0028864	0	0	0	0
SDSU_A_0028865	0	0	0	0
SDSU_A_0028866	0	0	0	0
SDSU_A_0028867	0	0	0	0
SDSU_A_0028868	0	0	0	0
SDSU_A_0028869	0	0	0	0
SDSU_A_0028870	0	0	0	0
SDSU_A_0028872	0	0	0	0
SDSU_A_0028873	0	0	0	0
SDSU_A_0028874	0	0	0	0
SDSU_A_0028875	0	0	0	0
SDSU_A_0028876	0	0	0	0
SDSU_A_0028877	0	0	0	0
SDSU_A_0028878	0	0	0	0
SDSU_A_0028879	0	0	0	0
SDSU_A_0028880	0	0	0	0
SDSU_A_0028881	0	0	0	0
SDSU_A_0028882	0	0	0	0
SDSU_A_0028883	0	0	0	0
SDSU_A_0028884	0	0	0	0
SDSU_A_0028886	0	0	0	0
SDSU_A_0028887	0	0	0	0
SDSU_A_0028888	0	0	0	0
SDSU_A_0028889	0	0	0	0
SDSU_A_0028890	0	0	0	0
SDSU_A_0028891	0	0	0	0
SDSU_A_0028892	0	0	0	0
SDSU_A_0028893	0	0	0	0
SDSU_A_0028894	0	0	0	0
SDSU_A_0028895	0	0	0	0
SDSU_A_0028896	0	0	0	0
SDSU_A_0028897	0	0	0	0
SDSU_A_0028898	0	0	0	0
SDSU_A_0028899	0	0	0	0
SDSU_A_0028900	0	0	0	0
SDSU_A_0028901	0	0	0	0
SDSU_A_0028902	0	0	0	0
SDSU_A_0028903	0	0	0	0
SDSU_A_0028904	0	0	0	0
SDSU_A_0028905	0	0	0	0
SDSU_A_0028906	0	0	0	0
SDSU_A_0028907	0	0	0	0
SDSU_A_0028908	0	0	0	0
SDSU_A_0028909	0	0	0	0
STANFORD_0051160	0	0	0	0
STANFORD_0051161	0	0	0	0
STANFORD_0051163	0	0	0	0
STANFORD_0051164	0	0	0	0
STANFORD_0051165	0	0	0	0
STANFORD_0051166	0	0	0	0
STANFORD_0051167	0	0	0	0
STANFORD_0051168	0	0	0	0
STANFORD_0051169	0	0	0	0
STANFORD_0051170	0	0	0	0
STANFORD_0051171	0	0	0	0
STANFORD_0051172	0	0	0	0
STANFORD_0051173	0	0	0	0
STANFORD_0051174	0	0	0	0
STANFORD_0051175	0	0	0	0
STANFORD_0051176	0	0	0	0
STANFORD_0051177	0	0	0	0
STANFORD_0051178	0	0	0	0
STANFORD_0051179	0	0	0	0
STANFORD_0051180	0	0	0	0
STANFORD_0051181	0	0	0	0
STANFORD_0051182	0	0	0	0
STANFORD_0051183	0	0	0	0
STANFORD_0051184	0	0	0	0
STANFORD_0051185	0	0	0	0
STANFORD_0051186	0	0	0	0
STANFORD_0051187	0	0	0	0
STANFORD_0051188	0	0	0	0
STANFORD_0051189	0	0	0	0
STANFORD_0051190	0	0	0	0
STANFORD_0051191	0	0	0	0
STANFORD_0051192	0	0	0	0
STANFORD_0051193	0	0	0	0
STANFORD_0051194	0	0	0	0
STANFORD_0051195	0	0	0	0
STANFORD_0051196	0	0	0	0
STANFORD_0051197	0	0	0	0
STANFORD_0051198	0	0	0	0
STANFORD_0051199	0	0	0	0
SU_B_0030168	0	0	0	0
SU_B_0030169	0	0	0	0
SU_B_0030170	0	0	0	0
SU_B_0030171	0	0	0	0
SU_B_0030172	0	0	0	0
SU_B_0030173	0	0	0	0
SU_B_0030174	0	0	0	0
SU_B_0030175	0	0	0	0
SU_B_0030178	0	0	0	0
SU_B_0030179	0	0	0	0
SU_B_0030180	0	0	0	0
SU_B_0030181	0	0	0	0
SU_B_0030182	0	0	0	0
SU_B_0030183	0	0	0	0
SU_B_0030184	0	0	0	0
SU_B_0030186	0	0	0	0
SU_B_0030187	0	0	0	0
SU_B_0030188	0	0	0	0
SU_B_0030189	0	0	0	0
SU_B_0030190	0	0	0	0
SU_B_0030191	0	0	0	0
SU_B_0030192	0	0	0	0
SU_B_0030193	0	0	0	0
SU_B_0030194	0	0	0	0
SU_B_0030195	0	0	0	0
SU_B_0030196	0	0	0	0
SU_B_0030197	0	0	0	0
SU_B_0030198	0	0	0	0
SU_B_0030199	0	0	0	0
SU_B_0030200	0	0	0	0
SU_B_0030201	0	0	0	0
SU_B_0030202	0	0	0	0
SU_B_0030203	0	0	0	0
SU_B_0030204	0	0	0	0
SU_B_0030205	0	0	0	0
SU_B_0030206	0	0	0	0
SU_B_0030207	0	0	0	0
TCD_A_0029096	1	1	1	1
TCD_A_0029097	1	1	1	1
TCD_A_0029098	1	1	1	1
TCD_A_0029099	1	1	1	1
TCD_A_0029100	1	1	1	1
TCD_A_0029101	1	1	1	1
TCD_A_0029102	1	1	0	0
TCD_A_0029103	1	1	1	1
TCD_A_0029104	1	1	1	1
TCD_A_0029105	1	1	1	1
TCD_A_0029106	0	0	0	0
TCD_A_0029107	1	1	1	1
TCD_A_0029108	1	1	1	1
TCD_A_0029109	1	1	1	1
TCD_A_0029110	1	1	0	0
TCD_A_0029111	1	1	1	1
TCD_A_0029112	1	1	1	1
TCD_A_0029113	1	1	1	1
TCD_A_0029114	1	1	1	1
TCD_A_0029115	0	0	0	0
TCD_A_0029116	1	1	1	1
TCD_A_0029117	1	1	1	1
TCD_A_0029118	1	1	1	1
TCD_A_0029119	1	1	1	1
TCD_A_0029120	0	0	0	0
TCD_A_0029121	1	1	1	1
TCD_A_0029122	1	1	1	1
TCD_A_0029123	0	0	0	0
TCD_A_0029124	1	1	1	1
TCD_A_0029125	1	1	1	1
TCD_A_0029126	1	1	1	1
TCD_A_0029127	0	0	0	0
TCD_A_0029128	1	1	1	1
TCD_A_0029129	0	0	0	0
TCD_A_0029130	1	1	1	1
TCD_A_0029131	1	1	1	1
TCD_A_0029132	1	1	1	1
TCD_A_0029133	0	0	0	0
TCD_A_0029134	1	1	1	1
TCD_A_0029135	1	1	1	1
TCD_A_0029136	0	0	0	0
TCD_A_0029137	1	1	1	1
TRINITY_0050232	0	0	0	0
TRINITY_0050233	0	0	0	0
TRINITY_0050234	0	0	0	0
TRINITY_0050235	0	0	0	0
TRINITY_0050236	0	0	0	0
TRINITY_0050237	0	0	0	0
TRINITY_0050238	0	0	0	0
TRINITY_0050239	0	0	0	0
TRINITY_0050240	0	0	0	0
TRINITY_0050241	0	0	0	0
TRINITY_0050242	0	0	0	0
TRINITY_0050243	0	0	0	0
TRINITY_0050244	0	0	0	0
TRINITY_0050245	0	0	0	0
TRINITY_0050246	0	0	0	0
TRINITY_0050247	0	0	0	0
TRINITY_0050248	0	0	0	0
TRINITY_0050249	0	0	0	0
TRINITY_0050250	0	0	0	0
TRINITY_0050251	0	0	0	0
TRINITY_0050252	0	0	0	0
TRINITY_0050253	0	0	0	0
TRINITY_0050254	0	0	0	0
TRINITY_0050255	0	0	0	0
TRINITY_0050257	0	0	0	0
TRINITY_0050259	0	0	0	0
TRINITY_0050260	0	0	0	0
TRINITY_0050261	0	0	0	0
TRINITY_0050262	0	0	0	0
TRINITY_0050263	0	0	0	0
TRINITY_0050264	0	0	0	0
TRINITY_0050265	0	0	0	0
TRINITY_0050266	0	0	0	0
TRINITY_0050267	0	0	0	0
TRINITY_0050268	0	0	0	0
TRINITY_0050269	0	0	0	0
TRINITY_0050270	0	0	0	0
TRINITY_0050271	0	0	0	0
TRINITY_0051132	0	0	0	0
TRINITY_0051133	0	0	0	0
TRINITY_0051134	0	0	0	0
TRINITY_0051135	0	0	0	0
TRINITY_0051136	0	0	0	0
TRINITY_0051137	0	0	0	0
TRINITY_0051138	0	0	0	0
TRINITY_0051139	0	0	0	0
TRINITY_0051140	0	0	0	0
TRINITY_0051141	0	0	0	0
TRINITY_0051142	0	0	0	0
UCD_A_0029997	0	0	0	0
UCD_A_0029998	0	0	0	0
UCD_A_0029999	0	0	0	0
UCD_A_0030000	0	0	0	0
UCD_A_0030001	0	0	0	0
UCD_A_0030002	0	0	0	0
UCD_A_0030003	0	0	0	0
UCD_A_0030004	0	0	0	0
UCD_A_0030005	0	0	0	0
UCD_A_0030006	0	0	0	0
UCD_A_0030007	0	0	0	0
UCD_A_0030008	0	0	0	0
UCD_A_0030009	0	0	0	0
UCD_A_0030010	0	0	0	0
UCD_A_0030011	0	0	0	0
UCD_A_0030012	0	0	0	0
UCD_A_0030013	0	0	0	0
UCD_A_0030014	0	0	0	0
UCD_A_0030015	0	0	0	0
UCD_A_0030016	0	0	0	0
UCD_A_0030017	0	0	0	0
UCD_A_0030018	0	0	0	0
UCD_A_0030019	0	0	0	0
UCD_A_0030020	0	0	0	0
UCD_A_0030022	0	0	0	0
UCD_A_0030023	0	0	0	0
UCD_A_0030024	0	0	0	0
UCD_A_0030026	0	0	0	0
UCD_A_0030027	0	0	0	0
UCD_A_0030028	0	0	0	0
UCD_A_0030029	0	0	0	0
UCLA_3_0029729	0	0	0	0
UCLA_3_0029730	0	0	0	0
UCLA_3_0029731	0	0	0	0
UCLA_3_0029732	0	0	0	0
UCLA_3_0029733	0	0	0	0
UCLA_3_0029734	0	0	0	0
UCLA_3_0029735	0	0	0	0
UCLA_3_0029736	0	0	0	0
UCLA_3_0029737	0	0	0	0
UCLA_3_0029738	0	0	0	0
UCLA_3_0029739	0	0	0	0
UCLA_3_0029740	0	0	0	0
UCLA_3_0029741	0	0	0	0
UCLA_3_0029744	0	0	0	0
UCLA_3_0029745	0	0	0	0
UCLA_3_0029749	0	0	0	0
UCLA_3_0029750	0	0	0	0
UCLA_3_0029751	0	0	0	0
UCLA_3_0029752	0	0	0	0
UCLA_3_0029753	0	0	0	0
UCLA_3_0029755	0	0	0	0
UCLA_3_0029757	0	0	0	0
UCLA_3_0029758	0	0	0	0
UCLA_3_0029759	0	0	0	0
UCLA_A_0051201	1	1	1	1
UCLA_A_0051202	1	1	1	1
UCLA_A_0051203	1	1	0	0
UCLA_A_0051204	1	1	1	1
UCLA_A_0051205	0	0	0	0
UCLA_A_0051206	1	1	1	1
UCLA_A_0051207	0	0	0	0
UCLA_A_0051208	1	1	1	1
UCLA_A_0051209	1	1	1	1
UCLA_A_0051210	1	1	1	1
UCLA_A_0051211	1	1	1	1
UCLA_A_0051212	1	1	1	1
UCLA_A_0051213	0	0	0	0
UCLA_A_0051214	1	1	1	1
UCLA_A_0051215	0	0	0	0
UCLA_A_0051216	1	1	1	1
UCLA_A_0051217	1	1	1	1
UCLA_A_0051218	1	1	1	1
UCLA_A_0051219	0	0	0	0
UCLA_A_0051220	1	1	1	1
UCLA_A_0051221	1	1	1	1
UCLA_A_0051222	1	1	1	1
UCLA_A_0051223	1	1	1	1
UCLA_A_0051224	1	1	1	1
UCLA_A_0051225	1	1	1	1
UCLA_A_0051226	0	0	0	0
UCLA_A_0051227	1	1	1	1
UCLA_A_0051228	0	0	0	0
UCLA_A_0051229	1	1	1	1
UCLA_A_0051230	0	0	0	0
UCLA_A_0051231	1	1	1	1
UCLA_A_0051234	1	1	1	1
UCLA_A_0051235	1	1	1	1
UCLA_A_0051236	1	1	1	1
UCLA_A_0051237	1	1	1	1
UCLA_A_0051238	1	1	0	0
UCLA_A_0051239	1	1	1	1
UCLA_A_0051240	1	1	1	1
UCLA_A_0051241	1	1	1	1
UCLA_A_0051248	1	1	1	1
UCLA_A_0051249	1	0	1	0
UCLA_A_0051250	1	1	1	1
UCLA_A_0051251	1	1	1	1
UCLA_A_0051252	1	1	1	1
UCLA_A_0051253	1	1	1	1
UCLA_A_0051254	1	1	1	1
UCLA_A_0051255	1	1	1	1
UCLA_A_0051256	1	1	1	1
UCLA_A_0051257	1	1	1	1
UCLA_A_0051258	1	1	0	0
UCLA_A_0051259	1	1	1	1
UCLA_A_0051260	1	1	1	1
UCLA_A_0051261	1	1	1	1
UCLA_A_0051262	0	0	0	0
UCLA_A_0051263	1	1	0	0
UCLA_A_0051264	0	0	0	0
UCLA_A_0051265	1	1	1	1
UCLA_A_0051266	1	1	1	1
UCLA_A_0051268	1	1	1	1
UCLA_A_0051269	1	1	1	1
UCLA_A_0051271	1	1	1	1
UCLA_A_0051272	1	1	1	1
UCLA_A_0051273	1	1	1	1
UCLA_A_0051274	1	1	1	1
UCLA_A_0051275	1	1	1	1
UCLA_A_0051276	1	1	1	1
UCLA_A_0051277	0	0	0	0
UCLA_A_0051278	1	1	1	1
UCLA_A_0051279	0	0	0	0
UCLA_A_0051280	1	1	1	1
UCLA_A_0051281	1	1	1	1
UCLA_B_0051291	0	0	0	0
UCLA_B_0051292	0	0	0	0
UCLA_B_0051293	0	0	0	0
UCLA_B_0051294	0	0	0	0
UCLA_B_0051295	0	0	0	0
UCLA_B_0051296	0	0	0	0
UCLA_B_0051297	0	0	0	0
UCLA_B_0051298	0	0	0	0
UCLA_B_0051299	0	0	0	0
UCLA_B_0051300	0	0	0	0
UCLA_B_0051301	0	0	0	0
UCLA_B_0051302	0	0	0	0
UCLA_B_0051303	0	0	0	0
UCLA_B_0051304	0	0	0	0
UCLA_B_0051305	0	0	0	0
UCLA_B_0051306	0	0	0	0
UCLA_B_0051307	0	0	0	0
UCLA_B_0051308	0	0	0	0
UCLA_B_0051309	0	0	0	0
UCLA_B_0051311	0	0	0	0
UCLA_B_0051312	0	0	0	0
UCLA_B_0051313	0	0	0	0
UCLA_B_0051314	0	0	0	0
UCLA_B_0051315	0	0	0	0
UCLA_B_0051316	0	0	0	0
UCLA_B_0051317	0	0	0	0
UM_A_0050275	1	1	1	1
UM_A_0050277	0	0	0	0
UM_A_0050278	0	0	0	0
UM_A_0050279	1	1	0	0
UM_A_0050280	1	1	1	1
UM_A_0050281	1	1	1	1
UM_A_0050282	1	1	1	1
UM_A_0050284	0	0	0	0
UM_A_0050285	0	0	0	0
UM_A_0050286	1	1	0	0
UM_A_0050288	0	0	0	0
UM_A_0050289	1	1	1	1
UM_A_0050290	1	1	1	1
UM_A_0050291	1	1	1	1
UM_A_0050292	1	1	1	1
UM_A_0050293	1	0	0	0
UM_A_0050294	1	1	1	1
UM_A_0050295	1	1	1	1
UM_A_0050296	0	0	0	0
UM_A_0050297	1	1	1	1
UM_A_0050298	1	1	1	1
UM_A_0050299	0	0	0	0
UM_A_0050300	0	0	0	0
UM_A_0050301	1	1	1	1
UM_A_0050302	0	0	0	0
UM_A_0050303	0	0	0	0
UM_A_0050304	1	1	1	1
UM_A_0050305	0	0	0	0
UM_A_0050306	1	0	1	0
UM_A_0050307	1	1	1	1
UM_A_0050308	1	0	0	0
UM_A_0050309	0	0	0	0
UM_A_0050310	1	1	1	1
UM_A_0050311	1	1	1	1
UM_A_0050312	1	1	1	1
UM_A_0050314	1	1	1	1
UM_A_0050315	1	1	1	1
UM_A_0050316	1	1	1	1
UM_A_0050317	1	1	0	0
UM_A_0050318	1	1	1	1
UM_A_0050319	0	0	0	0
UM_A_0050320	1	1	1	1
UM_A_0050321	0	0	0	0
UM_A_0050322	1	1	1	1
UM_A_0050323	0	0	0	0
UM_A_0050324	1	1	1	1
UM_A_0050325	1	1	1	1
UM_A_0050326	1	1	1	1
UM_A_0050328	0	0	0	0
UM_A_0050329	1	1	1	1
UM_A_0050330	1	1	1	1
UM_A_0050331	1	0	0	0
UM_A_0050332	1	1	1	1
UM_A_0050333	1	1	1	1
UM_A_0050334	1	1	1	1
UM_A_0050335	1	1	1	1
UM_A_0050336	0	0	0	0
UM_A_0050337	1	1	1	1
UM_A_0050338	0	0	0	0
UM_A_0050339	1	0	0	0
UM_A_0050340	0	0	0	0
UM_A_0050341	0	0	0	0
UM_A_0050342	1	1	1	1
UM_A_0050343	0	0	0	0
UM_A_0050344	1	1	1	1
UM_A_0050345	0	0	0	0
UM_A_0050346	1	1	1	1
UM_A_0050347	1	1	1	1
UM_A_0050348	0	0	0	0
UM_A_0050349	1	1	1	1
UM_A_0050350	1	1	1	1
UM_A_0050351	1	1	1	1
UM_A_0050352	1	1	1	1
UM_A_0050353	0	0	0	0
UM_A_0050354	0	0	0	0
UM_A_0050355	1	1	1	1
UM_A_0050356	0	0	0	0
UM_A_0050357	0	0	0	0
UM_A_0050358	1	1	1	1
UM_A_0050359	1	1	1	1
UM_A_0050360	1	1	1	1
UM_A_0050361	0	0	0	0
UM_A_0050362	1	1	1	1
UM_A_0050363	1	1	1	1
UM_A_0050364	0	0	0	0
UM_A_0050365	1	1	1	1
UM_A_0050366	1	0	1	0
UM_A_0050367	1	1	1	1
UM_A_0050368	1	1	1	1
UM_A_0050369	0	0	0	0
UM_A_0050370	1	1	1	1
UM_A_0050371	1	1	1	1
UM_A_0050372	1	1	1	1
UM_A_0050373	0	0	0	0
UM_A_0050374	0	0	0	0
UM_A_0050375	0	0	0	0
UM_A_0050376	1	1	1	1
UM_A_0050377	0	0	0	0
UM_A_0050378	1	1	1	1
UM_A_0050379	0	0	0	0
UM_A_0050380	0	0	0	0
UM_A_0050381	1	1	1	1
UM_B_0050382	0	0	0	0
UM_B_0050383	0	0	0	0
UM_B_0050385	0	0	0	0
UM_B_0050386	0	0	0	0
UM_B_0050387	0	0	0	0
UM_B_0050388	0	0	0	0
UM_B_0050390	0	0	0	0
UM_B_0050391	0	0	0	0
UM_B_0050397	0	0	0	0
UM_B_0050399	0	0	0	0
UM_B_0050402	0	0	0	0
UM_B_0050403	0	0	0	0
UM_B_0050404	0	0	0	0
UM_B_0050405	0	0	0	0
UM_B_0050406	0	0	0	0
UM_B_0050407	0	0	0	0
UM_B_0050408	0	0	0	0
UM_B_0050410	0	0	0	0
UM_B_0050411	0	0	0	0
UM_B_0050412	0	0	0	0
UM_B_0050413	0	0	0	0
UM_B_0050414	0	0	0	0
UM_B_0050415	0	0	0	0
UM_B_0050416	0	0	0	0
UM_B_0050417	0	0	0	0
UM_B_0050418	0	0	0	0
UM_B_0050419	0	0	0	0
UM_B_0050421	0	0	0	0
UM_B_0050422	0	0	0	0
UM_B_0050423	0	0	0	0
UM_B_0050424	0	0	0	0
UM_B_0050425	0	0	0	0
UM_B_0050426	0	0	0	0
UM_B_0050427	0	0	0	0
UM_B_0050428	0	0	0	0
USM_0050432	1	1	1	1
USM_0050433	1	1	1	1
USM_0050434	1	1	1	1
USM_0050435	0	0	0	0
USM_0050436	1	1	1	1
USM_0050437	1	1	1	1
USM_0050438	1	1	1	1
USM_0050439	1	0	1	0
USM_0050440	0	0	0	0
USM_0050441	1	0	1	0
USM_0050442	1	0	1	0
USM_0050443	1	1	1	1
USM_0050444	1	0	1	0
USM_0050445	1	1	1	1
USM_0050446	0	0	0	0
USM_0050447	1	1	1	1
USM_0050448	1	1	1	1
USM_0050449	1	1	1	1
USM_0050450	1	0	1	0
USM_0050451	1	1	1	1
USM_0050452	1	0	1	0
USM_0050453	1	0	0	0
USM_0050454	1	1	1	1
USM_0050455	1	0	1	0
USM_0050456	1	1	1	1
USM_0050457	1	0	1	0
USM_0050458	0	0	0	0
USM_0050459	0	0	0	0
USM_0050460	1	1	1	1
USM_0050461	1	1	1	1
USM_0050462	0	0	0	0
USM_0050463	0	0	0	0
USM_0050464	1	1	1	1
USM_0050465	1	0	1	0
USM_0050466	1	0	1	0
USM_0050467	1	1	1	1
USM_0050468	1	0	1	0
USM_0050469	1	0	1	0
USM_0050470	1	1	1	1
USM_0050471	1	0	1	0
USM_0050472	1	0	1	0
USM_0050473	1	0	1	0
USM_0050474	1	0	1	0
USM_0050475	0	0	0	0
USM_0050476	1	0	1	0
USM_0050477	1	0	1	0
USM_0050478	1	0	1	0
USM_0050479	1	0	1	0
USM_0050480	1	0	1	0
USM_0050481	1	1	0	0
USM_0050482	0	0	0	0
USM_0050483	1	0	1	0
USM_0050484	1	1	1	1
USM_0050485	1	0	1	0
USM_0050486	1	1	1	1
USM_0050487	1	0	1	0
USM_0050488	1	0	1	0
USM_0050489	1	1	0	0
USM_0050490	1	1	1	1
USM_0050491	1	0	1	0
USM_0050492	1	0	1	0
USM_0050493	1	0	1	0
USM_0050494	0	0	0	0
USM_0050495	1	0	1	0
USM_0050496	1	0	1	0
USM_0050497	1	0	1	0
USM_0050498	1	0	1	0
USM_0050499	1	0	1	0
USM_0050500	1	1	1	1
USM_0050501	1	1	1	1
USM_0050502	1	0	1	0
USM_0050503	1	0	1	0
USM_0050504	1	1	1	1
USM_0050505	0	0	0	0
USM_0050506	1	1	1	1
USM_0050507	0	0	0	0
USM_0050508	0	0	0	0
USM_0050509	1	1	0	0
USM_0050510	1	1	0	0
USM_0050511	1	1	1	1
USM_0050512	1	1	1	1
USM_0050513	1	1	1	1
USM_0050514	1	0	1	0
USM_0050515	0	0	0	0
USM_0050516	1	1	1	1
USM_0050517	1	1	1	1
USM_0050518	1	1	1	1
USM_0050519	0	0	0	0
USM_0050520	1	1	1	1
USM_0050521	1	1	1	1
USM_0050522	0	0	0	0
USM_0050523	1	1	1	1
USM_0050524	1	1	1	1
USM_0050525	0	0	0	0
USM_0050527	1	1	1	1
USM_0050528	1	1	1	1
USM_0050530	1	1	1	1
USM_0050531	1	0	0	0
USM_0050532	1	1	1	1
USM_A_0029495	0	0	0	0
USM_A_0029496	0	0	0	0
USM_A_0029497	0	0	0	0
USM_A_0029498	0	0	0	0
USM_A_0029499	0	0	0	0
USM_A_0029500	0	0	0	0
USM_A_0029501	0	0	0	0
USM_A_0029502	0	0	0	0
[truncated: 109 more rows]

## Sheet: structural fQC
Label	Harm_int			No_harm			Harm_est
	Position	Values	SD	Position	Values	SD	Position	Values	SD
CSF_Volume_mm3	2	0.0055	0.0012	1	0.00642156	0.00232174	1	0.00806886	0.0022033
rh_parsopercularis_ThickAvg	3	0.00490811	0.00365867	10	0.00300437	0.00127449	9	0.00292254	0.000796499
Right-VentralDC_Volume_mm3	8	0.00376716	2.34985e-05	11	0.00293696	0.00236926	5	0.00386366	0.00345935
lh_isthmuscingulate_ThickStd	10	0.00367596	0.00106163	47	0.000650038	0.000209912	46	0.000565202	0.000552917
lh_caudalmiddlefrontal_ThickAvg	11	0.00327437	0.00198421	22	0.00176001	0.00139015	42	0.000625473	0.00244087
rh_cuneus_GrayVol	12	0.00326142	0.00326234	13	0.00281779	0.000103954	2	0.00587026	0.000172556
rh_fusiform_ThickStd	16	0.00300213	0.00120531	31	0.00134159	0.00238001	8	0.00324343	0.000994767
lh_caudalmiddlefrontal_GrayVol	18	0.00296926	0.00215403	49	0.000533151	0.000344743	13	0.00218044	0.000152007
rh_superiorparietal_ThickAvg	19	0.00290512	0.000642489	35	0.00121804	0.00131385	44	0.000606974	0.000239998
rh_transversetemporal_ThickAvg	23	0.00276969	0.00478231	38	0.000982584	0.00140564	30	0.0011122	3.22463e-05
lh_fusiform_ThickStd	24	0.00274177	0.000977223	6	0.00321771	0.00309858	15	0.00212654	0.00208464
rh_caudalanteriorcingulate_GrayVol	26	0.00271553	0.00335955	42	0.000893275	0.000573677	35	0.000817559	0.00239898
rh_caudalmiddlefrontal_ThickAvg	28	0.00268456	0.000374618	59	0.000358747	0.00103075	51	0.000459371	0.000914311
rh_lingual_ThickStd	29	0.00267651	0.000852455	5	0.00378072	0.0043804	14	0.00213648	0.00132629
rh_lingual_GrayVol	40	0.00216801	7.29207e-05	14	0.00271364	0.00263903	62	0.000126608	0.0047418
lh_insula_ThickStd	50	0.00173325	0.000321245	41	0.0009187	0.00020222	43	0.000609727	0.00304463
rh_inferiorparietal_GrayVol	51	0.00171914	0.00429146	12	0.002917	9.48929e-05	36	0.000762278	0.001643
lh_rostralanteriorcingulate_GrayVol	53	0.00168321	0.00323126	45	0.000674646	0.000787015	45	0.000601725	0.00206467
lh_caudalanteriorcingulate_ThickStd	54	0.00168266	0.00143324	67	0.000147043	0.00140795	16	0.00210361	0.0011472
lh_medialorbitofrontal_ThickAvg	57	0.00163787	0.000688171	7	0.00310521	0.000799081	38	0.000720548	0.00299126
Left-Pallidum_Volume_mm3	58	0.00163761	0.000900086	46	0.000665309	0.00400642	64	8.62552e-05	0.000397222
lh_cuneus_ThickAvg	59	0.0015862	0.000727108	44	0.000823367	4.30997e-05	67	5.91528e-05	0.000145685
CC_Mid_Anterior_Volume_mm3	64	0.00140074	0.000374618	26	0.00163705	0.000105589	70	2.46074e-05	1.6088e-05
rh_precuneus_GrayVol	65	0.00137614	0.00227643	19	0.00232413	0.00137102	34	0.000953805	0.00334628
rh_parsorbitalis_ThickAvg	68	0.00131535	0.00188084	21	0.00176723	0.000292582	48	0.000553887	0.000401121

## Sheet: structural minSC
Label	Harm_int			No_harm			Harm_est
	Position	Values	SD	Position	Values	SD	Position	Values	SD
rh_middletemporal_ThickStd	14	0.00342857	0.00419913	1	0.0190825	0.0147462	3	0.00879678	0.00214885
lh_inferiorparietal_ThickStd	12	0.00392757	0.00553969	11	0.00655936	0.00630855	5	0.00740443	0.00561855
rh_caudalmiddlefrontal_ThickAvg	34	0.00169014	0.00137999	66	0.00226157	0.00068014	11	0.005666	3.94284e-05
lh_postcentral_ThickStd	27	0.00228571	0.00279942	52	0.00255936	0.00140957	12	0.00539235	0.00142928
rh_middletemporal_GrayVol	7	0.00536821	0.00205028	63	0.00226157	0.00068014	14	0.00482093	0.000729426
lh_middletemporal_ThickStd	28	0.00226157	0.00068014	42	0.002833	1.97142e-05	21	0.00370221	0.00280927
lh_inferiortemporal_ThickStd	2	0.00762978	0.00273042	54	0.00253521	0.00206999	23	0.00310664	0.00137014
rh_inferiorparietal_GrayVol	55	0.000523139	0.00625926	23	0.00484507	0.00420898	28	0.00255936	0.00140957
lh_precuneus_ThickStd	17	0.00338028	0.00275999	44	0.00280885	0.00345984	40	0.0014165	9.8571e-06
rh_medialorbitofrontal_ThickStd	30	0.00196378	0.00276985	27	0.0042495	2.95713e-05	42	0.00139235	0.0034697
rh_superiortemporal_ThickStd	9	0.00479678	0.00275013	5	0.00767807	0.0042287	47	0.00084507	0.000689997
lh_medialorbitofrontal_ThickAvg	16	0.00338028	0.00275999	25	0.0042495	2.95713e-05	55	0.000321932	0.000556926

## Sheet: connectivity fQC
HO_A	HO_B	Label	Harm_int			No_harm			Harm_est
			Position	Values	SD	Position	Values	SD	Position	Values	SD
Left Temporal Pole	Right Paracingulate Gyrus	422	1	0.00116194	0.000286838	19	0.000838553	0.000767046	31	0.00070562	0.000206382
Left Angular Gyrus	Right Middle Temporal Gyrus; anterior division	3543	3	0.00108179	0.000846501	412	0.000266985	0.000629844	536	0.000275287	0.000516563
Right Middle Temporal Gyrus; posterior division	Right Hippocampus	1806	4	0.000881401	6.28577e-05	10	0.000921195	0.000546227	89	0.000553887	0.000618568
Right Middle Frontal Gyrus	Right Putamen	874	5	0.000880024	0.000599389	57	0.000635411	0.000477626	200	0.000438076	0.00017772
Right Precuneous Cortex	Right Middle Temporal Gyrus; anterior division	3495	7	0.000681572	6.22785e-05	763	0.000162789	0.000338843	516	0.000282472	0.000345956
Right Occipital Pole	Left Insular Cortex	677	9	0.000669139	0.00040091	189	0.000419277	0.000383523	1561	8.40189e-05	3.15712e-05
Right Parietal Operculum Cortex	Left Pallidum	4357	10	0.000667203	0.000278935	537	0.000221383	0.000386684	94	0.000551951	0.000496593
Left Temporal Fusiform Cortex; posterior division	Left Juxtapositional Lobule Cortex (formerly Supplementary Motor Cortex)	2975	12	0.000621601	0.000522095	1217	8.2083e-05	4.37687e-05	492	0.00028772	5.33738e-05
Right Middle Temporal Gyrus; temporooccipital part	Right Parahippocampal Gyrus; posterior division	4043	13	0.000620224	0.000105863	51	0.000663331	3.49853e-05	813	0.000205637	0.000491061
Left Superior Temporal Gyrus; posterior division	Right Pallidum	4421	18	0.000564384	3.34047e-05	559	0.000214198	0.000216078	103	0.000540336	0.000235256
Left Middle Temporal Gyrus; anterior division	Right Planum Polare	3826	21	0.000548079	0.000252643	117	0.000538959	0.000301275	1551	8.59547e-05	1.93737e-05
Left Hippocampus	Left Middle Temporal Gyrus; anterior division	3622	25	0.000529839	0.000349907	179	0.000425084	1.75982e-05	75	0.000577376	0.000228723
Left Lateral Occipital Cortex; inferior division	Right Amygdala	3933	27	0.000529839	0.000349907	791	0.000155046	0.000826743	2	0.0011893	0.000140943
Left Frontal Pole	Right Paracingulate Gyrus	407	28	0.000522654	0.000520514	219	0.000393292	0.000774159	12	0.000833864	0.000184042
Left Cingulate Gyrus; posterior division	Left Occipital Fusiform Gyrus	1528	29	0.000518783	0.000276564	1005	0.000115252	0.000217658	52	0.000621601	0.000522095
Right Lateral Occipital Cortex; superior division	Left Thalamus	256	31	0.000507726	0.000203221	188	0.000419277	0.000383523	172	0.000463501	9.01509e-05
Right Paracingulate Gyrus	Left Middle Temporal Gyrus; anterior division	3599	33	0.000502478	0.000495803	17	0.00086785	0.000790967	460	0.0002974	0.000663249
Left Middle Frontal Gyrus	Left Middle Temporal Gyrus; anterior division	3578	35	0.00048755	0.00017851	114	0.000542272	0.000113281	185	0.000447197	0.000129088
Left Juxtapositional Lobule Cortex (formerly Supplementary Motor Cortex)	Right Frontal Operculum Cortex	4542	37	0.000476494	0.000105167	875	0.000135428	0.000192947	1209	0.000135428	0.000192947
Right Thalamus	Right Middle Temporal Gyrus; temporooccipital part	731	39	0.000471245	0.000397749	31	0.000769462	0.000134041	42	0.000664708	0.000501546
Left Thalamus	Right Juxtapositional Lobule Cortex (formerly Supplementary Motor Cortex)	1914	40	0.000469309	0.000275774	176	0.000430333	0.00031018	255	0.000393851	0.000115652
Left Temporal Occipital Fusiform Cortex	Left Middle Temporal Gyrus; anterior division	3644	44	0.000464061	0.000568356	757	0.000164166	0.000875375	417	0.00031564	0.000565985
Right Frontal Pole	Left Cingulate Gyrus; posterior division	903	45	0.00045494	0.000616988	140	0.000490862	0.000236047	134	0.000498606	0.000251853
Left Superior Temporal Gyrus; posterior division	Right Inferior Frontal Gyrus; pars triangularis	3053	50	0.000447197	0.000129088	18	0.000859289	8.38284e-05	1404	0.00010669	0.00048948
Right Cingulate Gyrus; anterior division	Right Inferior Temporal Gyrus; temporooccipital part	1675	54	0.000440012	0.000299695	43	0.000697317	0.000940024	64	0.000601425	0.000497384
Right Lateral Occipital Cortex; superior division	Left Pallidum	4281	56	0.000438076	0.00017772	313	0.000318394	0.000507079	308	0.000364555	9.17316e-05
Right Postcentral Gyrus	Left Superior Temporal Gyrus; posterior division	1232	58	0.000434205	6.62301e-05	220	0.000391916	0.000237627	774	0.000215317	0.000110094
Left Precentral Gyrus	Left Accumbens	5055	63	0.000425084	1.75982e-05	38	0.000717494	0.000915313	683	0.000236311	6.93914e-05
Right Lateral Occipital Cortex; inferior division	Right Temporal Fusiform Cortex; posterior division	2229	64	0.000423707	0.000518934	273	0.000347691	0.000530999	357	0.000339129	0.000176139
Right Insular Cortex	Right Parahippocampal Gyrus; anterior division	2179	65	0.000421772	0.000396959	106	0.000556641	0.000454495	245	0.000399659	0.000250272
Left Planum Temporale	Right Frontal Operculum Cortex	4545	69	0.0004179	0.000153009	16	0.000869786	0.000668992	299	0.000372298	0.000396168
Right Paracingulate Gyrus	Right Middle Temporal Gyrus; anterior division	3515	71	0.000415964	3.10337e-05	497	0.000235752	0.000727898	70	0.000590368	0.000424041
Left Middle Frontal Gyrus	Right Temporal Occipital Fusiform Cortex	1439	72	0.000414587	0.000567565	241	0.000373675	0.000140364	463	0.000296841	4.74193e-06
Right Superior Frontal Gyrus	Right Superior Parietal Lobule	335	80	0.000407403	0.000738172	66	0.000619106	0.000258387	129	0.000503855	4.07287e-05
Right Inferior Temporal Gyrus; posterior division	Left Angular Gyrus	1641	81	0.000406844	7.96656e-05	792	0.000153669	0.000290211	1346	0.000117187	9.56832e-05
Left Frontal Pole	Right Superior Parietal Lobule	326	82	0.000405467	0.000616197	1267	7.68344e-05	1.45105e-05	27	0.000716676	0.000279726
Right Precentral Gyrus	Left Parietal Operculum Cortex	2854	84	0.000399659	0.000250272	67	0.00061717	0.000380362	213	0.000425643	0.000640908
Right Frontal Orbital Cortex	Right Middle Temporal Gyrus; anterior division	3511	86	0.000396346	0.000664829	101	0.000564384	3.34047e-05	372	0.000333322	0.000189786
Right Superior Parietal Lobule	Right Central Opercular Cortex	1737	93	0.000383913	0.000112802	1	0.00135015	0.000319875	1	0.0011893	0.000140943
Right Occipital Pole	Left Occipital Pole	102	94	0.000383354	0.000469511	42	0.000706997	0.000330149	1260	0.000128244	2.23402e-05
Left Cingulate Gyrus; posterior division	Right Middle Temporal Gyrus; anterior division	3529	96	0.000381418	0.000347536	173	0.000434205	6.62301e-05	62	0.000604737	8.28269e-05
Left Juxtapositional Lobule Cortex (formerly Supplementary Motor Cortex)	Right Middle Temporal Gyrus; anterior division	3563	98	0.000374234	0.000518143	601	0.000203142	0.000289421	215	0.000425084	1.75982e-05
Left Temporal Fusiform Cortex; posterior division	Right Hippocampus	1819	99	0.000374234	0.000518143	1004	0.000115252	0.000217658	1024	0.000163348	0.000319664
Right Lateral Occipital Cortex; superior division	Left Accumbens	5053	101	0.000372298	0.000396168	1266	7.68344e-05	1.45105e-05	334	0.000350186	0.000249482
Right Precentral Gyrus	Left Lingual Gyrus	355	103	0.000368426	0.000152218	461	0.000247367	3.95161e-06	1113	0.000150356	0.000124346
Right Precentral Gyrus	Left Inferior Frontal Gyrus; pars triangularis	2560	105	0.000368426	0.000152218	315	0.000317017	2.9453e-05	346	0.000344937	0.000542064
Right Cingulate Gyrus; posterior division	Right Middle Temporal Gyrus; anterior division	3510	106	0.000365114	0.000566775	413	0.000266985	0.000629844	301	0.000368426	0.000152218
Left Inferior Frontal Gyrus; pars triangularis	Right Planum Polare	3813	107	0.000365114	0.000566775	679	0.00018103	0.000436107	734	0.000223878	0.000393797
Left Planum Polare	Right Pallidum	4462	111	0.000363178	0.0004448	39	0.000716117	0.000378781	102	0.000540895	0.00042325
Right Middle Temporal Gyrus; anterior division	Left Planum Polare	4179	112	0.000363178	0.0004448	1069	0.00010226	0.000412976	140	0.000491422	0.00042246
Right Paracingulate Gyrus	Right Juxtapositional Lobule Cortex (formerly Supplementary Motor Cortex)	1920	113	0.000361242	0.000322825	941	0.000124372	0.00026629	82	0.000564384	3.34047e-05
Right Middle Temporal Gyrus; anterior division	Right Amygdala	4000	115	0.000359306	0.00020085	567	0.000210886	0.000198479	4	0.00106105	0.000163283
Left Supramarginal Gyrus; posterior division	Left Temporal Occipital Fusiform Cortex	2748	118	0.000354057	0.000493432	76	0.000602242	0.000697655	1282	0.000124931	0.000392217
Left Supramarginal Gyrus; posterior division	Left Temporal Fusiform Cortex; posterior division	1223	121	0.000350745	0.000907989	372	0.000283848	0.000190576	74	0.000579312	0.000350698
Right Cingulate Gyrus; anterior division	Right Superior Temporal Gyrus; posterior division	1150	128	0.000346314	5.53225e-06	442	0.000254552	0.000166655	138	0.000494734	7.90321e-06
Right Central Opercular Cortex	Right Subcallosal Cortex	2474	130	0.00034356	0.00010786	1567	4.17299e-05	4.8711e-05	1420	0.000104754	0.000367506
Left Superior Parietal Lobule	Right Central Opercular Cortex	1742	134	0.000341065	0.000298114	1019	0.000111939	0.000196899	22	0.000742101	1.18548e-05
Left Superior Frontal Gyrus	Right Inferior Temporal Gyrus; posterior division	1002	135	0.000341065	0.000298114	361	0.000291033	0.000361183	46	0.000647585	0.000912731
Left Frontal Pole	Left Superior Parietal Lobule	466	143	0.000333881	0.000468721	283	0.000342442	0.000238418	5	0.000973164	0.000235045
Left Superior Parietal Lobule	Left Temporal Fusiform Cortex; posterior division	1207	147	0.000331945	0.000346746	506	0.000230503	0.000435316	286	0.000377547	0.000103586
Right Angular Gyrus	Right Putamen	891	150	0.000328073	0.000102796	448	0.000252616	0.00028863	176	0.000458812	0.000860938
Right Thalamus	Left Pallidum	4306	151	0.000326137	1.91789e-05	464	0.000246808	0.000654555	693	0.000234375	0.000191366
Left Precentral Gyrus	Right Middle Temporal Gyrus; temporooccipital part	708	155	0.000322825	0.000395378	437	0.000256487	4.46803e-05	958	0.000174404	0.000393007
Left Superior Frontal Gyrus	Right Cingulate Gyrus; posterior division	288	157	0.000322825	0.000395378	150	0.000473999	0.000675315	714	0.000229126	0.000101215
Right Cingulate Gyrus; anterior division	Left Juxtapositional Lobule Cortex (formerly Supplementary Motor Cortex)	2948	159	0.000320889	0.000273403	1531	4.75375e-05	1.21185e-05	1067	0.000157541	4.6261e-05
Left Precentral Gyrus	Right Planum Temporale	3833	169	0.000313704	0.00044401	840	0.000141236	0.000172978	1571	8.07062e-05	9.88445e-06
Left Postcentral Gyrus	Left Accumbens	5056	172	0.000311769	0.000322035	846	0.000140677	0.000485529	1237	0.000131556	0.000436897
Right Caudate	Left Central Opercular Cortex	1321	173	0.000309833	0.00020006	514	0.000227191	2.07595e-05	501	0.000285784	6.86011e-05
Right Precentral Gyrus	Left Amygdala	3659	176	0.000307897	7.8085e-05	817	0.000146484	0.000119604	244	0.000401595	0.000372247
Left Temporal Pole	Right Thalamus	394	179	0.000305961	4.389e-05	1148	9.31392e-05	3.64344e-05	149	0.000483678	6.54398e-05
Right Central Opercular Cortex	Left Inferior Frontal Gyrus; pars triangularis	2615	181	0.000304584	0.000492642	1006	0.000115252	0.000217658	1099	0.000152292	0.000246321
Right Putamen	Left Middle Temporal Gyrus; temporooccipital part	1872	183	0.000302648	0.000370667	1159	8.98265e-05	5.02126e-05	1558	8.40189e-05	3.15712e-05
Right Caudate	Left Occipital Fusiform Gyrus	1531	185	0.000300712	0.000248692	1329	6.77141e-05	9.64735e-06	1351	0.000115252	0.000217658
Right Lateral Occipital Cortex; superior division	Right Cingulate Gyrus; anterior division	234	191	0.000298776	0.000126717	129	0.000507167	0.000455285	63	0.000602801	3.91481e-05
Right Middle Temporal Gyrus; posterior division	Right Inferior Frontal Gyrus; pars opercularis	2664	198	0.000296841	4.74193e-06	28	0.000778583	0.000182673	298	0.000372298	0.000396168
Right Parahippocampal Gyrus; posterior division	Right Pallidum	4461	199	0.000296841	4.74193e-06	122	0.000531216	0.000186624	1318	0.000119123	2.62918e-05
Right Thalamus	Right Supracalcarine Cortex	4978	201	0.000295464	0.000541274	774	0.000158917	0.000582793	1149	0.000146484	0.000119604
Right Occipital Pole	Right Supramarginal Gyrus; anterior division	1964	204	0.000291592	0.000297324	663	0.000186837	7.01818e-05	1529	8.78906e-05	7.17624e-05
Right Juxtapositional Lobule Cortex (formerly Supplementary Motor Cortex)	Left Inferior Temporal Gyrus; temporooccipital part	2340	205	0.000291592	0.000297324	861	0.000137364	7.09721e-05	125	0.000507726	0.000203221
Right Superior Frontal Gyrus	Left Cingulate Gyrus; posterior division	913	212	0.00028772	5.33738e-05	517	0.000227191	2.07595e-05	243	0.000402972	0.000164284
Left Paracingulate Gyrus	Right Parietal Operculum Cortex	3116	216	0.00028772	5.33738e-05	498	0.000234375	0.000191366	405	0.000318953	0.000151428
Right Cuneal Cortex	Right Middle Temporal Gyrus; anterior division	348	217	0.000286343	0.000589906	1356	6.38423e-05	0.000340423	253	0.000394411	0.000542854
Left Thalamus	Right Superior Parietal Lobule	3555	219	0.000286343	0.000589906	63	0.000622419	0.000672944	19	0.00077527	0.000231884
Left Lingual Gyrus	Left Cingulate Gyrus; posterior division	930	224	0.000284408	0.000467931	234	0.000380859	0.00031097	38	0.000671075	0.000522885
Right Parietal Operculum Cortex	Left Accumbens	2418	226	0.000282472	0.000345956	231	0.000382795	0.000188995	106	0.000531775	0.000471882
Right Lateral Occipital Cortex; superior division	Right Subcallosal Cortex	5129	227	0.000282472	0.000345956	212	0.000401036	0.000286259	111	0.00052459	0.000642489
Left Middle Frontal Gyrus	Right Paracingulate Gyrus	414	229	0.000282472	0.000345956	190	0.000418717	0.000104203	634	0.000247367	3.95161e-06
Right Middle Temporal Gyrus; temporooccipital part	Left Angular Gyrus	1634	231	0.000280536	0.000223981	1094	0.000100324	0.000534951	1279	0.000126308	0.000144315
Right Superior Frontal Gyrus	Right Heschl's Gyrus (includes H1 and H2)	4763	233	0.000280536	0.000223981	131	0.000507167	0.000455285	116	0.000516847	0.000154589
Left Inferior Frontal Gyrus; pars opercularis	Left Accumbens	5114	235	0.000280536	0.000223981	950	0.000122436	0.000388265	526	0.0002786	0.000102006
Right Lateral Occipital Cortex; inferior division	Left Superior Temporal Gyrus; anterior division	4869	234	0.000280536	0.000223981	688	0.000179653	0.000100425	1398	0.000108067	4.70513e-05
Right Superior Parietal Lobule	Left Frontal Operculum Cortex	4212	236	0.0002786	0.000102006	1439	5.66579e-05	1.69817e-05	505	0.000285784	6.86011e-05
Left Temporal Pole	Right Temporal Fusiform Cortex; posterior division	2227	241	0.000274728	0.000141944	889	0.000133492	0.000314922	1336	0.000117187	9.56832e-05
Left Juxtapositional Lobule Cortex (formerly Supplementary Motor Cortex)	Left Supracalcarine Cortex	5228	254	0.00026948	0.000150638	933	0.000126308	0.000144315	294	0.000375611	1.83885e-05
Right Caudate	Right Pallidum	4417	261	0.000267544	2.86627e-05	813	0.00014842	2.37096e-06	1151	0.000146484	0.000119604
Right Angular Gyrus	Left Pallidum	4308	263	0.000266167	0.000565194	194	0.000414587	0.000567565	66	0.000597553	0.000253434
Left Heschl's Gyrus (includes H1 and H2)	Left Superior Temporal Gyrus; anterior division	4947	265	0.000264231	0.00044322	263	0.000352939	0.000823581	998	0.000168597	2.70821e-05
Left Paracingulate Gyrus	Right Caudate	1070	266	0.000264231	0.00044322	1228	8.07062e-05	9.88445e-06	1332	0.000117188	9.56832e-05
Right Thalamus	Right Juxtapositional Lobule Cortex (formerly Supplementary Motor Cortex)	1808	271	0.000262295	0.000321245	229	0.000382795	0.000188995	16	0.000797382	0.00037857
Right Middle Temporal Gyrus; temporooccipital part	Right Hippocampus	1919	272	0.000262295	0.000321245	504	0.000232439	0.000313341	660	0.000241559	0.000361973
Right Inferior Temporal Gyrus; posterior division	Left Supramarginal Gyrus; posterior division	1126	278	0.000260359	0.00019927	715	0.000171909	0.000387475	169	0.000463501	9.01509e-05
Right Precentral Gyrus	Right Supramarginal Gyrus; anterior division	1957	281	0.000258423	7.72946e-05	533	0.000221942	0.000271822	1589	8.07062e-05	9.88445e-06
Left Frontal Operculum Cortex	Left Accumbens	5142	286	0.000258423	7.72946e-05	7	0.00097454	0.000301487	92	0.000553328	3.99384e-05
Right Inferior Temporal Gyrus; temporooccipital part	Right Frontal Operculum Cortex	4523	292	0.000258423	7.72946e-05	298	0.00032945	0.000433736	477	0.000291592	0.000297324
Left Frontal Pole	Left Frontal Operculum Cortex	1147	300	0.000253175	0.000369876	9	0.000943308	0.000399541	131	0.000502478	0.000495803
Left Precuneous Cortex	Right Superior Temporal Gyrus; posterior division	4187	302	0.000253175	0.000369876	247	0.000367867	0.000506288	1380	0.000110003	7.49237e-05
Left Occipital Pole	Right Supracalcarine Cortex	4964	303	0.000253175	0.000369876	144	0.000481742	0.000187415	144	0.00048755	0.00017851
Right Frontal Orbital Cortex	Left Subcallosal Cortex	3265	304	0.000252616	0.00028863	240	0.000375052	0.000676895	148	0.000485614	5.65351e-05
Left Inferior Frontal Gyrus; pars opercularis	Left Inferior Temporal Gyrus; temporooccipital part	2342	310	0.000251239	0.000247902	1414	5.85938e-05	4.78416e-05	587	0.000260359	0.00019927
Left Frontal Pole	Right Cuneal Cortex	2347	312	0.000251239	0.000247902	430	0.000261736	0.000337262	360	0.000337753	0.000712671
Right Middle Temporal Gyrus; posterior division	Right Inferior Frontal Gyrus; pars triangularis	3039	316	0.000249303	0.000125927	1526	4.75375e-05	1.21185e-05	723	0.000227191	2.07595e-05
Left Thalamus	Left Supracalcarine Cortex	5174	350	0.000240183	0.000174558	1373	6.05296e-05	7.41334e-05	479	0.000291592	0.000297324
Left Middle Temporal Gyrus; temporooccipital part	Right Inferior Frontal Gyrus; pars triangularis	3064	360	0.000238247	5.25835e-05	843	0.000141236	0.000172978	454	0.000298776	0.000126717
Left Hippocampus	Left Juxtapositional Lobule Cortex (formerly Supplementary Motor Cortex)	2978	364	0.000238247	5.25835e-05	1438	5.66579e-05	0.000169817	419	0.000315081	9.25219e-05
Left Middle Frontal Gyrus	Right Frontal Orbital Cortex	308	367	0.00023687	0.000589115	103	0.000560512	0.000210545	351	0.000344378	0.000116443
Left Superior Temporal Gyrus; posterior division	Left Central Opercular Cortex	1325	369	0.000232998	0.000345165	394	0.000276105	0.000678476	455	0.000298776	0.000126717
Right Precuneous Cortex	Left Accumbens	5059	377	0.000232439	0.000313341	1404	5.99705e-05	0.000584373	145	0.00048755	0.00017851
Right Superior Parietal Lobule	Left Parietal Operculum Cortex	2876	378	0.000231621	0.000881697	171	0.000437517	0.000480787	3	0.00107211	0.000236626
Right Temporal Fusiform Cortex; posterior division	Right Superior Temporal Gyrus; anterior division	4723	383	0.000231062	0.00022319	250	0.000362619	0.000213707	491	0.000289656	0.000175349
Left Thalamus	Right Parietal Operculum Cortex	3104	388	0.000229126	0.000101215	1242	7.87703e-05	2.31305e-05	1216	0.000134051	0.000343585
Right Superior Frontal Gyrus	Left Central Opercular Cortex	1285	406	0.000223878	0.000393797	353	0.000294905	0.000117233	902	0.000186837	7.01818e-05
Left Frontal Orbital Cortex	Right Frontal Orbital Cortex	321	431	0.00021807	2.78724e-05	1057	0.000106131	0.000169026	1124	0.00014842	2.37096e-06
Right Postcentral Gyrus	Left Hippocampus	1333	434	0.00021807	2.78724e-05	654	0.000188773	5.17932e-05	929	0.000179653	0.000100425
Right Superior Parietal Lobule	Left Putamen	846	439	0.000216693	0.000564404	142	0.000486991	0.000479997	17	0.000795446	0.000256595
Right Cingulate Gyrus; anterior division	Left Accumbens	5072	441	0.000216134	9.41026e-05	1348	6.57782e-05	2.18448e-05	1114	0.000150356	0.000124346
Right Thalamus	Right Insular Cortex	589	452	0.000210886	0.000198479	79	0.000593681	9.48386e-06	796	0.000210327	0.000460027
Right Thalamus	Right Middle Temporal Gyrus; anterior division	2362	456	0.000210886	0.000198479	1454	5.4722e-05	2.91792e-05	47	0.000647026	0.000254224
Left Temporal Pole	Right Cuneal Cortex	3514	457	0.000210886	0.000198479	137	0.000496111	0.000528629	1493	9.36983e-05	0.000294162
Left Postcentral Gyrus	Left Amygdala	3661	460	0.00020895	7.65043e-05	403	0.000270856	0.000385894	754	0.00021807	2.78724e-05
Left Middle Temporal Gyrus; posterior division	Left Cingulate Gyrus; anterior division	1573	468	0.00020895	7.65043e-05	995	0.000117187	9.56832e-05	1321	0.000119123	2.62918e-05
Left Superior Temporal Gyrus; posterior division	Right Supramarginal Gyrus; anterior division	2003	473	0.00020895	7.65043e-05	1437	5.80347e-05	3.06348e-05	497	0.00028772	5.33738e-05
Right Inferior Temporal Gyrus; temporooccipital part	Right Temporal Fusiform Cortex; posterior division	2269	474	0.00020895	7.65043e-05	112	0.000545584	0.000527838	1083	0.000156164	0.000490271
Left Inferior Frontal Gyrus; pars opercularis	Right Subcallosal Cortex	2479	484	0.000203701	0.000369086	1192	8.78906e-05	7.17624e-05	1504	9.17624e-05	1.72188e-05
Left Postcentral Gyrus	Left Frontal Operculum Cortex	1940	491	0.000201765	0.000247111	1152	9.12033e-05	4.86319e-05	727	0.000227191	2.07595e-05
Left Temporal Fusiform Cortex; posterior division	Right Juxtapositional Lobule Cortex (formerly Supplementary Motor Cortex)	4192	494	0.000201765	0.000247111	949	0.000122436	0.000388265	529	0.0002786	0.000102006
Right Lateral Occipital Cortex; superior division	Right Juxtapositional Lobule Cortex (formerly Supplementary Motor Cortex)	1894	522	0.000195958	0.000118814	50	0.000664708	0.000501546	76	0.00057544	0.000106748
Right Temporal Pole	Right Paracingulate Gyrus	421	524	0.000194581	0.000417718	761	0.000162789	0.000338843	45	0.000652834	0.000620149
Left Superior Frontal Gyrus	Right Juxtapositional Lobule Cortex (formerly Supplementary Motor Cortex)	1903	536	0.000192645	0.000295743	770	0.000159476	7.5714e-05	436	0.000307897	7.8085e-05
Right Postcentral Gyrus	Left Amygdala	3662	538	0.000190709	0.000173768	1169	8.98265e-05	5.02126e-05	235	0.000408779	0.000201641
Right Precentral Gyrus	Left Intracalcarine Cortex	2489	547	0.000190709	0.000173768	311	0.00032033	0.000385104	1139	0.00014842	2.37096e-06
Right Superior Frontal Gyrus	Right Supracalcarine Cortex	4960	564	0.000188773	5.17932e-05	592	0.000205078	0.000167446	117	0.000516847	0.000154589
Left Lateral Occipital Cortex; inferior division	Left Parietal Operculum Cortex	2867	568	0.000188773	5.17932e-05	1512	4.94734e-05	7.90321e-07	1370	0.000110003	7.49237e-05
Right Intracalcarine Cortex	Right Subcallosal Cortex	2480	576	0.000186837	7.01818e-05	821	0.000146484	0.000119604	692	0.000234375	0.000191366
Left Insular Cortex	Left Temporal Fusiform Cortex; posterior division	1265	589	0.000183525	0.000344375	107	0.000554705	0.00057647	168	0.000464061	0.000568356
Left Supramarginal Gyrus; anterior division	Left Superior Temporal Gyrus; posterior division	1213	588	0.000183525	0.000344375	1503	4.94734e-05	7.90321e-07	728	0.000225255	0.000142734
Right Inferior Frontal Gyrus; pars opercularis	Left Cuneal Cortex	11	590	0.000183525	0.000344375	1072	0.000100883	0.000123556	312	0.000362619	0.000213707
Left Frontal Pole	Left Precentral Gyrus	3476	591	0.000183525	0.000344375	381	0.0002786	0.000102006	241	0.000403531	0.000494222
Left Supramarginal Gyrus; posterior division	Right Planum Temporale	3875	597	0.000181589	0.0002224	1386	6.05296e-05	7.41334e-05	1572	8.07062e-05	9.88445e-06
Right Insular Cortex	Left Superior Temporal Gyrus; posterior division	1259	594	0.000181589	0.0002224	1134	9.50751e-05	0.000242369	1438	0.000100883	0.000123556
Left Occipital Fusiform Gyrus	Right Planum Temporale	262	600	0.000181589	0.0002224	677	0.000181589	0.0002224	1284	0.000124372	0.00026629
Left Precuneous Cortex	Left Insular Cortex	685	601	0.000181589	0.0002224	204	0.000406284	0.000578841	335	0.000350186	0.000249482
Right Precuneous Cortex	Left Thalamus	3883	606	0.000181589	0.0002224	906	0.000128244	2.23402e-05	443	0.000305961	4.389e-05
Right Putamen	Right Temporal Fusiform Cortex; posterior division	2253	611	0.000181589	0.0002224	119	0.000536464	0.000479206	338	0.000346314	5.53225e-06
Left Intracalcarine Cortex	Left Cuneal Cortex	3474	613	0.000181589	0.0002224	431	0.000261736	0.000337262	68	0.000593681	9.48386e-06
Left Frontal Pole	Left Paracingulate Gyrus	596	619	0.000181589	0.0002224	723	0.000169974	0.00050945	43	0.000663331	3.49853e-05
Right Lateral Occipital Cortex; superior division	Right Temporal Fusiform Cortex; posterior division	2214	625	0.000179653	0.000100425	947	0.000122995	0.000270242	1042	0.000161412	0.000197689
Left Precuneous Cortex	Right Occipital Fusiform Gyrus	1397	628	0.000179653	0.000100425	647	0.000188773	5.17932e-05	1480	9.56342e-05	0.000416137
Right Frontal Pole	Right Inferior Temporal Gyrus; temporooccipital part	1653	645	0.000177717	2.15498e-05	1058	0.000106131	0.000169026	1145	0.000146484	0.000119604
Left Cingulate Gyrus; anterior division	Right Central Opercular Cortex	1767	646	0.000177717	2.15498e-05	965	0.000119123	2.62918e-05	538	0.000274728	0.000141944
Right Inferior Temporal Gyrus; posterior division	Right Hippocampus	1815	653	0.000177717	2.15498e-05	644	0.000188773	5.17932e-05	1146	0.000146484	0.000119604
Left Thalamus	Left Middle Temporal Gyrus; anterior division	3593	661	0.000177717	2.15498e-05	1322	6.965e-05	2.55014e-05	566	0.000265608	9.33122e-05
Right Inferior Temporal Gyrus; temporooccipital part	Left Parietal Operculum Cortex	2908	666	0.000177717	2.15498e-05	764	0.000161412	0.000197689	859	0.000197894	3.16129e-06
Left Superior Parietal Lobule	Left Inferior Frontal Gyrus; pars triangularis	2587	680	0.000172469	0.000271032	54	0.000648403	0.000282308	59	0.000608609	0.000326777
Left Hippocampus	Right Planum Polare	3793	683	0.000172469	0.000271032	1272	7.68344e-05	0.000145105	1202	0.000135987	0.00046556
Left Middle Frontal Gyrus	Left Temporal Pole	128	705	0.000170533	0.000149057	896	0.00013018	9.96348e-05	808	0.000207014	4.54706e-05
Right Intracalcarine Cortex	Left Inferior Frontal Gyrus; pars triangularis	2621	712	0.000168597	2.70821e-05	1269	7.68344e-05	1.45105e-05	314	0.000362619	0.000213707
Right Middle Frontal Gyrus	Left Putamen	833	711	0.000168597	2.70821e-05	23	0.000824184	0.000425832	557	0.00026948	0.000150638
Left Supramarginal Gyrus; anterior division	Right Cuneal Cortex	5021	721	0.000168597	2.70821e-05	1543	4.75375e-05	0.000121185	1011	0.000166661	9.48929e-05
Left Intracalcarine Cortex	Right Supracalcarine Cortex	2386	719	0.000168597	2.70821e-05	721	0.000170533	0.000149057	1286	0.000122995	0.000270242
Right Occipital Pole	Left Frontal Orbital Cortex	221	723	0.000168597	2.70821e-05	1336	6.77141e-05	9.64735e-06	378	0.000331386	0.000311761
Right Superior Temporal Gyrus; posterior division	Left Cingulate Gyrus; anterior division	1588	724	0.000168597	2.70821e-05	1548	4.56017e-05	2.4316e-05	1041	0.000161412	0.000197689
Right Occipital Pole	Left Inferior Frontal Gyrus; pars triangularis	2567	732	0.000166661	9.48929e-05	1415	5.85938e-05	4.78416e-05	642	0.000245431	0.000118023
Right Lateral Occipital Cortex; superior division	Left Cingulate Gyrus; anterior division	1543	737	0.000166661	9.48929e-05	345	0.000300712	0.000248692	23	0.00073823	0.000232095
Right Middle Frontal Gyrus	Left Central Opercular Cortex	1288	735	0.000166661	9.48929e-05	553	0.000216134	9.41026e-05	170	0.000463501	9.01509e-05
Left Middle Frontal Gyrus	Left Inferior Frontal Gyrus; pars opercularis	418	752	0.000161412	0.000197689	1278	7.48985e-05	0.00026708	1293	0.000121059	0.000148267
Left Superior Frontal Gyrus	Right Paracingulate Gyrus	2024	754	0.000161412	0.000197689	1584	4.03531e-05	4.94222e-05	733	0.000225255	0.000142734
Left Supramarginal Gyrus; posterior division	Right Inferior Frontal Gyrus; pars triangularis	4513	767	0.000161412	0.000197689	83	0.000589809	0.000234466	269	0.000388603	0.000176929
Left Inferior Temporal Gyrus; posterior division	Left Temporal Occipital Fusiform Cortex	3050	766	0.000161412	0.000197689	297	0.000332763	0.000429244	1460	9.757e-05	0.000538112
Right Superior Temporal Gyrus; posterior division	Right Frontal Operculum Cortex	2740	765	0.000161412	0.000197689	1194	8.78906e-05	7.17624e-05	603	0.000256487	4.46803e-05
Left Middle Temporal Gyrus; posterior division	Left Juxtapositional Lobule Cortex (formerly Supplementary Motor Cortex)	2959	780	0.000159476	7.5714e-05	410	0.000267544	2.86627e-05	1273	0.000126308	0.000144315
Right Lateral Occipital Cortex; superior division	Left Middle Temporal Gyrus; temporooccipital part	734	782	0.000159476	7.5714e-05	839	0.000142613	6.35539e-05	175	0.00045963	0.000334101
Left Superior Parietal Lobule	Right Middle Temporal Gyrus; temporooccipital part	1833	785	0.000159476	7.5714e-05	1318	6.965e-05	2.55014e-05	666	0.000238247	5.25835e-05
Right Lingual Gyrus	Left Supramarginal Gyrus; anterior division	800	791	0.000159476	7.5714e-05	1388	6.05296e-05	7.41334e-05	1111	0.000150356	0.000124346
Left Middle Temporal Gyrus; posterior division	Right Insular Cortex	594	796	0.000159476	7.5714e-05	1576	4.03531e-05	4.94222e-05	851	0.000197894	3.16129e-06
Left Planum Temporale	Left Subcallosal Cortex	3320	806	0.0001581	0.000612246	671	0.000184902	0.000192157	439	0.000307897	7.8085e-05
Right Precuneous Cortex	Right Lateral Occipital Cortex; inferior division	162	824	0.000154228	0.000368296	1240	8.01471e-05	0.000559662	1236	0.000131556	0.000436897
Right Superior Parietal Lobule	Right Planum Temporale	3854	835	0.000152292	0.000246321	1187	8.78906e-05	7.17624e-05	1256	0.000128244	2.23402e-05
Left Temporal Pole	Right Central Opercular Cortex	1727	838	0.000152292	0.000246321	1125	9.7011e-05	0.000120394	1548	8.59547e-05	1.93737e-05
Left Lingual Gyrus	Left Amygdala	3682	851	0.000150356	0.000124346	166	0.000448573	0.000407444	510	0.000283848	0.000190576
Right Lateral Occipital Cortex; inferior division	Left Planum Polare	4113	859	0.000150356	0.000124346	1376	6.05296e-05	7.41334e-05	1060	0.000159476	7.5714e-05
Left Hippocampus	Right Supramarginal Gyrus; anterior division	442	862	0.000150356	0.000124346	521	0.000225255	0.000142734	467	0.000294905	0.000117233
Right Postcentral Gyrus	Right Angular Gyrus	2005	864	0.000150356	0.000124346	809	0.00014842	2.37096e-06	1117	0.00014842	2.37096e-06
Left Thalamus	Left Parahippocampal Gyrus; anterior division	2798	874	0.000150356	0.000124346	316	0.000317017	2.9453e-05	514	0.000283848	0.000190576
Left Frontal Orbital Cortex	Left Subcallosal Cortex	3261	888	0.00014842	2.37096e-06	727	0.000168597	2.70821e-05	1185	0.0001393	5.10029e-05
Left Cingulate Gyrus; posterior division	Right Occipital Fusiform Gyrus	1421	905	0.000147043	0.000538903	295	0.000333322	0.000189786	7	0.00092369	0.000234255
Right Juxtapositional Lobule Cortex (formerly Supplementary Motor Cortex)	Left Amygdala	3717	908	0.000146484	0.000119604	205	0.000404908	4.23093e-05	366	0.000335258	6.78108e-05
Right Postcentral Gyrus	Right Middle Frontal Gyrus	85	925	0.000141236	0.000172978	1053	0.000106131	0.000169026	493	0.00028772	5.33738e-05
Left Inferior Temporal Gyrus; posterior division	Left Angular Gyrus	1635	937	0.000141236	0.000172978	1310	6.965e-05	2.55014e-05	1383	0.000108067	4.70513e-05
Left Frontal Orbital Cortex	Right Cingulate Gyrus; anterior division	3676	949	0.000141236	0.000172978	1175	8.98265e-05	5.02126e-05	741	0.000223319	0.000264709
Left Frontal Orbital Cortex	Left Amygdala	252	940	0.000141236	0.000172978	700	0.000175781	0.000143525	582	0.000261736	0.000337262
Left Superior Temporal Gyrus; posterior division	Left Parietal Operculum Cortex	2900	963	0.000139859	0.00070951	1210	8.45779e-05	0.000342794	29	0.00071474	0.000157751
Right Thalamus	Left Middle Temporal Gyrus; temporooccipital part	1858	962	0.000139859	0.00070951	4	0.00107349	0.000299906	302	0.000367867	0.000506288
Left Cingulate Gyrus; anterior division	Right Parietal Operculum Cortex	2580	971	0.0001393	5.10029e-05	1029	0.000110003	7.49237e-05	793	0.000210886	0.000198479
Right Angular Gyrus	Left Cingulate Gyrus; posterior division	933	969	0.0001393	5.10029e-05	1458	5.33452e-05	0.00024474	1350	0.000115252	0.000217658
Left Caudate	Right Superior Temporal Gyrus; anterior division	3137	972	0.0001393	5.10029e-05	1195	8.78906e-05	7.17624e-05	604	0.000256487	4.46803e-05
Right Cingulate Gyrus; posterior division	Left Inferior Frontal Gyrus; pars triangularis	4700	973	0.0001393	5.10029e-05	1368	6.05296e-05	7.41334e-05	261	0.000391916	0.000237627
Right Putamen	Right Superior Temporal Gyrus; anterior division	4698	986	0.0001393	5.10029e-05	1000	0.000117187	9.56832e-05	1168	0.000141236	0.000172978
Right Cingulate Gyrus; anterior division	Right Frontal Operculum Cortex	4487	1000	0.000137364	7.09721e-05	1243	7.87703e-05	2.31305e-05	765	0.000216134	9.41026e-05
Left Middle Frontal Gyrus	Right Temporal Pole	113	1003	0.000135987	0.00046556	203	0.000406844	7.96656e-05	1476	9.56342e-05	0.000416137
Left Lateral Occipital Cortex; superior division	Right Central Opercular Cortex	1713	1011	0.000134051	0.000343585	1505	4.94734e-05	7.90321e-07	386	0.000326137	1.91789e-05
Left Temporal Fusiform Cortex; posterior division	Left Accumbens	959	1012	0.000134051	0.000343585	401	0.000270856	0.000385894	403	0.000320889	0.000273403
Right Middle Frontal Gyrus	Left Caudate	5099	1013	0.000134051	0.000343585	1592	4.03531e-05	4.94222e-05	484	0.000291033	0.000361183
Right Thalamus	Left Intracalcarine Cortex	2513	1021	0.000132115	0.00022161	573	0.000210327	0.000460027	735	0.000223319	0.000264709
Left Temporal Pole	Right Insular Cortex	577	1023	0.000132115	0.00022161	1071	0.00010226	0.000412976	278	0.000382795	0.000188995
Right Cingulate Gyrus; anterior division	Right Hippocampus	1792	1059	0.00013018	9.96348e-05	722	0.000169974	0.00050945	678	0.000236311	6.93914e-05
Right Postcentral Gyrus	Right Paracingulate Gyrus	413	1066	0.000128803	0.000636167	118	0.000538959	0.000301275	1204	0.000135987	0.00046556
Left Temporal Fusiform Cortex; posterior division	Left Middle Temporal Gyrus; anterior division	3619	1068	0.000128803	0.000636167	701	0.000175781	0.000143525	1399	0.000108067	4.70513e-05
Left Inferior Temporal Gyrus; posterior division	Left Middle Temporal Gyrus; temporooccipital part	1869	1086	0.000128244	2.23402e-05	1249	7.87703e-05	2.31305e-05	614	0.000254552	0.000166655
Right Middle Temporal Gyrus; posterior division	Right Parahippocampal Gyrus; anterior division	2181	1102	0.000124931	0.000392217	621	0.000195958	0.000118814	143	0.000489486	0.000300485
Right Intracalcarine Cortex	Left Parietal Operculum Cortex	2915	1106	0.000124931	0.000392217	912	0.000128244	2.23402e-05	1217	0.000134051	0.000343585
Left Paracingulate Gyrus	Left Hippocampus	1361	1110	0.000124372	0.00026629	1436	5.80347e-05	7.06348e-05	51	0.000622978	1.44369e-05
Left Middle Temporal Gyrus; posterior division	Left Heschl's Gyrus (includes H1 and H2)	4593	1113	0.000122995	0.000270242	852	0.0001393	5.10029e-05	457	0.000298776	0.000126717
Right Juxtapositional Lobule Cortex (formerly Supplementary Motor Cortex)	Right Frontal Operculum Cortex	4527	1146	0.000121059	0.000148267	1062	0.000104195	0.000291001	1090	0.000155605	0.000168236
Right Superior Parietal Lobule	Right Parietal Operculum Cortex	3107	1143	0.000121059	0.000148267	851	0.0001393	5.10029e-05	868	0.000195958	0.000118814
Left Inferior Frontal Gyrus; pars triangularis	Right Parietal Operculum Cortex	3153	1174	0.000121059	0.000148267	368	0.000285784	6.86011e-05	1299	0.000121059	0.000148267
Right Frontal Orbital Cortex	Left Parietal Operculum Cortex	2875	1172	0.000121059	0.000148267	1468	5.14093e-05	1.22765e-05	1176	0.0001393	5.10029e-05
Right Lingual Gyrus	Left Superior Temporal Gyrus; posterior division	1245	1185	0.000121059	0.000148267	1107	9.89468e-05	1.58064e-06	665	0.000238247	5.25835e-05
Right Superior Parietal Lobule	Left Cuneal Cortex	5034	1205	0.000119123	2.62918e-05	1031	0.000110003	7.49237e-05	488	0.000289656	0.000175349
Right Middle Temporal Gyrus; anterior division	Right Supracalcarine Cortex	2441	1202	0.000119123	2.62918e-05	1393	6.05296e-05	7.41334e-05	1405	0.000106131	0.000169026
Right Superior Parietal Lobule	Right Subcallosal Cortex	3429	1203	0.000119123	2.62918e-05	1374	6.05296e-05	7.41334e-05	1409	0.000106131	0.000169026
Left Superior Parietal Lobule	Right Inferior Frontal Gyrus; pars opercularis	2659	1208	0.000119123	2.62918e-05	376	0.000281913	0.000312551	382	0.000330009	0.000224771
Left Central Opercular Cortex	Left Inferior Frontal Gyrus; pars opercularis	2067	1221	0.000117188	9.56832e-05	385	0.000277482	0.00121501	384	0.000330009	0.000224771
Left Precentral Gyrus	Left Temporal Pole	125	1220	0.000117188	9.56832e-05	1489	4.94734e-05	7.90321e-07	586	0.000261736	0.000337262
Right Cingulate Gyrus; posterior division	Right Inferior Frontal Gyrus; pars opercularis	2652	1225	0.000117187	9.56832e-05	1257	7.87703e-05	2.31305e-05	919	0.000182966	0.000314132
Left Precuneous Cortex	Right Heschl's Gyrus (includes H1 and H2)	4772	1234	0.000115811	0.000440849	113	0.000543649	0.000649813	756	0.00021807	2.78724e-05
Left Hippocampus	Left Inferior Frontal Gyrus; pars opercularis	2068	1237	0.000115811	0.000440849	329	0.000311209	0.000336472	465	0.000296841	4.74193e-06
Right Superior Frontal Gyrus	Right Central Opercular Cortex	5215	1252	0.000111939	0.000196899	1064	0.000104195	0.000291001	628	0.000249303	0.000125927
Left Inferior Frontal Gyrus; pars opercularis	Left Supracalcarine Cortex	1721	1248	0.000111939	0.000196899	604	0.00019983	0.000125136	718	0.000227191	2.07595e-05
Right Occipital Fusiform Gyrus	Right Supracalcarine Cortex	5003	1265	0.000110003	7.49237e-05	711	0.000175781	0.000143525	219	0.000421212	0.000261548
Left Paracingulate Gyrus	Left Cingulate Gyrus; posterior division	938	1267	0.000110003	7.49237e-05	694	0.000177717	2.15498e-05	1050	0.000159476	7.5714e-05
Right Temporal Fusiform Cortex; posterior division	Right Pallidum	4438	1283	0.000110003	7.49237e-05	741	0.000166661	9.48929e-05	1275	0.000126308	0.000144315
Left Precentral Gyrus	Right Supracalcarine Cortex	4955	1286	0.000110003	7.49237e-05	248	0.000367867	0.000506288	489	0.000289656	0.000175349
Left Lateral Occipital Cortex; superior division	Left Middle Temporal Gyrus; temporooccipital part	325	1289	0.000110003	7.49237e-05	314	0.000317017	2.9453e-05	340	0.000346314	5.53225e-06
Right Frontal Pole	Right Superior Parietal Lobule	1832	1293	0.000110003	7.49237e-05	208	0.000402972	0.000164284	104	0.000540336	0.000235256
Left Postcentral Gyrus	Right Cingulate Gyrus; anterior division	237	1288	0.000110003	7.49237e-05	1245	7.87703e-05	2.31305e-05	953	0.000175781	0.000143525
Left Hippocampus	Left Parahippocampal Gyrus; anterior division	2827	1307	0.000110003	7.49237e-05	784	0.000157541	4.6261e-05	1254	0.000128244	2.23402e-05
Right Occipital Pole	Right Amygdala	3927	1316	0.000108626	0.000611455	74	0.000604737	8.28269e-05	1367	0.000110003	7.49237e-05
Right Inferior Temporal Gyrus; posterior division	Left Superior Temporal Gyrus; posterior division	1431	1322	0.000108067	4.70513e-05	1595	4.03531e-05	4.94222e-05	1144	0.000146484	0.000119604
Right Frontal Pole	Right Temporal Occipital Fusiform Cortex	1270	1321	0.000108067	4.70513e-05	1569	4.03531e-05	4.94222e-05	598	0.000258423	7.72946e-05
Right Thalamus	Left Paracingulate Gyrus	623	1327	0.000108067	4.70513e-05	1232	8.07062e-05	9.88445e-05	1315	0.000119123	2.62918e-05
Left Supramarginal Gyrus; anterior division	Left Planum Polare	4135	1340	0.000108067	4.70513e-05	1532	4.75375e-05	1.21185e-05	1079	0.000157541	4.6261e-05
Right Angular Gyrus	Left Supramarginal Gyrus; anterior division	810	1344	0.000106131	0.000169026	1012	0.000115252	0.000217658	267	0.000388603	0.000176929
Right Cingulate Gyrus; anterior division	Left Planum Temporale	3182	1348	0.000104754	0.000367506	423	0.000265049	0.000751819	41	0.000665267	0.00015696
Left Lingual Gyrus	Left Parietal Operculum Cortex	2877	1351	0.000104754	0.000367506	574	0.00020895	7.65043e-05	1240	0.00013018	9.96348e-05
Right Supramarginal Gyrus; anterior division	Right Supracalcarine Cortex	193	1364	0.000102819	0.000245531	1581	4.03531e-05	4.94222e-05	353	0.000343001	0.000420089
Right Lateral Occipital Cortex; superior division	Right Lingual Gyrus	5013	1372	0.000102819	0.000245531	802	0.000150356	0.000124346	1307	0.000121059	0.000148267
Right Middle Frontal Gyrus	Left Occipital Fusiform Gyrus	1498	1373	0.000102819	0.000245531	507	0.000230503	0.000435316	789	0.000212822	0.000320454
Right Frontal Operculum Cortex	Left Heschl's Gyrus (includes H1 and H2)	4655	1392	0.000100883	0.000123556	956	0.000121059	0.000148267	1181	0.0001393	5.10029e-05
Right Occipital Pole	Left Heschl's Gyrus (includes H1 and H2)	4571	1403	0.000100883	0.000123556	989	0.000117188	9.56832e-05	1025	0.000163348	0.000319664
Right Precentral Gyrus	Right Supracalcarine Cortex	4954	1418	0.000100883	0.000123556	225	0.000386108	0.000603552	750	0.000220006	0.000149847
Right Temporal Fusiform Cortex; posterior division	Right Supracalcarine Cortex	5017	1452	0.000100883	0.000123556	672	0.000184902	0.000192157	1211	0.000135428	0.000192947
Right Planum Polare	Left Accumbens	5137	1453	0.000100883	0.000123556	62	0.000626291	0.000428994	73	0.000586497	0.000180091
Left Frontal Operculum Cortex	Right Pallidum	4463	1462	9.89468e-05	1.58064e-06	634	0.000194022	0.000240789	343	0.000346314	5.53225e-06
Left Lingual Gyrus	Left Superior Temporal Gyrus; anterior division	4878	1468	9.89468e-05	1.58064e-06	692	0.000177717	2.15498e-05	429	0.000313145	0.000214497
Right Lateral Occipital Cortex; inferior division	Right Planum Temporale	4239	1467	9.89468e-05	1.58064e-06	1462	5.33452e-05	0.00024474	823	0.000205078	0.000167446
Right Occipital Fusiform Gyrus	Left Frontal Operculum Cortex	3846	1466	9.89468e-05	1.58064e-06	633	0.000194022	0.000240789	1301	0.000121059	0.000148267
Left Lingual Gyrus	Left Supramarginal Gyrus; posterior division	1417	1473	9.89468e-05	1.58064e-06	1248	7.87703e-05	2.31305e-05	639	0.000245431	0.000118023
Left Inferior Temporal Gyrus; posterior division	Right Occipital Fusiform Gyrus	1108	1472	9.89468e-05	1.58064e-06	1349	6.57782e-05	0.000218448	1252	0.000128244	2.23402e-05
Left Precuneous Cortex	Right Middle Temporal Gyrus; anterior division	3505	1491	9.757e-05	0.000538112	6	0.0010605	0.000495224	69	0.000592304	0.000546016
Left Planum Polare	Right Supracalcarine Cortex	5041	1494	9.757e-05	0.000538112	718	0.000170533	0.000149057	365	0.000335258	6.78108e-05
Left Precuneous Cortex	Right Inferior Temporal Gyrus; temporooccipital part	1672	1504	9.36983e-05	0.000294162	636	0.000192086	0.000362764	383	0.000330009	0.000224771
Left Inferior Frontal Gyrus; pars opercularis	Right Temporal Fusiform Cortex; posterior division	2275	1523	9.17624e-05	0.000172188	1003	0.000117187	9.56832e-05	1305	0.000121059	0.000148267
Right Intracalcarine Cortex	Left Juxtapositional Lobule Cortex (formerly Supplementary Motor Cortex)	320	1553	8.98265e-05	5.02126e-05	1206	8.59547e-05	0.000193737	792	0.000210886	0.000198479
Right Cingulate Gyrus; posterior division	Right Pallidum	4395	1561	8.98265e-05	5.02126e-05	904	0.00013018	9.96348e-05	1017	0.000164725	0.000216868
Right Lingual Gyrus	Right Frontal Orbital Cortex	2991	1558	8.98265e-05	5.02126e-05	346	0.000300712	0.000248692	163	0.000472622	0.000138783
Right Superior Parietal Lobule	Left Middle Temporal Gyrus; temporooccipital part	1856	1568	8.98265e-05	5.02126e-05	1426	5.85937e-05	4.78416e-05	809	0.000207014	4.54706e-05
Left Precuneous Cortex	Left Superior Parietal Lobule	484	1588	8.98265e-05	5.02126e-05	862	0.000137364	7.09721e-05	689	0.000234375	0.000191366
Right Lateral Occipital Cortex; superior division	Right Insular Cortex	564	1596	8.78906e-05	7.17624e-05	207	0.000402972	0.000164284	577	0.000263672	0.000215287

## Sheet: connectivity minSC
HO_A	HO_B	Label	Harm_int			No_harm			Harm_est
			Position	Values	SD	Position	Values	SD	Position	Values	SD
Left Superior Temporal Gyrus; posterior division	Left Heschl's Gyrus (includes H1 and H2)	4610	1	0.0018834	0.00133767	1	0.00190961	0.000625288	2	0.00133083	0.000119362
Right Superior Temporal Gyrus; posterior division	Right Planum Temporale	3876	2	0.00181074	0.000322632	27	0.0011525	0.000240587	3	0.00123378	0.000393471
Left Superior Temporal Gyrus; posterior division	Left Planum Temporale	3210	3	0.00166493	0.00145947	144	0.000859378	3.21005e-05	1	0.00139478	0.000138223
Left Postcentral Gyrus	Left Superior Temporal Gyrus; posterior division	1231	4	0.00161085	0.000748239	35	0.00111053	0.000193925	4	0.00110166	0.000134464
Left Postcentral Gyrus	Right Thalamus	384	5	0.00146155	4.0735e-05	75	0.000978402	6.50822e-05	32	0.000652185	0.000701577
Left Precuneous Cortex	Right Middle Temporal Gyrus; anterior division	3505	6	0.00124208	0.000713971	290	0.000739359	0.000503623	31	0.00065401	0.00026649
Right Frontal Orbital Cortex	Left Angular Gyrus	1621	8	0.0012225	0.000397806	229	0.000781909	0.000228768	70	0.000525116	0.000328694
Left Temporal Pole	Left Thalamus	269	9	0.00121545	0.000892354	342	0.000703029	0.000326527	549	0.000168044	3.71462e-05
Left Thalamus	Left Planum Polare	4118	10	0.00121404	0.000991263	420	0.00066894	0.000187593	1213	5.60696e-05	0.000554584
Left Planum Polare	Left Heschl's Gyrus (includes H1 and H2)	4651	11	0.00118659	0.000101653	76	0.000972762	0.000460721	7	0.000979812	3.38274e-05
Left Lateral Occipital Cortex; inferior division	Right Amygdala	3933	12	0.00116884	0.000220575	461	0.000654425	0.000267506	21	0.000748234	0.000444162
Left Middle Temporal Gyrus; posterior division	Left Supramarginal Gyrus; posterior division	1114	13	0.00116179	0.000715122	406	0.000673584	4.96751e-05	102	0.000459341	0.000125254
Left Frontal Orbital Cortex	Right Inferior Frontal Gyrus; pars triangularis	3024	14	0.00115856	0.000378945	371	0.000692329	0.000702153	159	0.000369762	0.000598638
Left Paracingulate Gyrus	Left Middle Temporal Gyrus; anterior division	3605	15	0.00114081	0.000497867	67	0.000991507	0.000291107	255	0.000296938	0.000558038
Right Central Opercular Cortex	Right Planum Polare	3800	17	0.00112123	0.000181701	722	0.000564845	0.000205878	8	0.000958827	0.000251083
Right Middle Temporal Gyrus; posterior division	Right Subcallosal Cortex	2451	18	0.00110771	3.89445e-06	134	0.000872898	0.000145707	20	0.000762334	0.000544934
Left Precuneous Cortex	Left Intracalcarine Cortex	2504	19	0.00110025	3.55543e-05	145	0.000857553	0.000467188	29	0.00066753	8.86832e-05
Right Postcentral Gyrus	Right Superior Temporal Gyrus; posterior division	1135	21	0.00105023	0.000657389	57	0.00101855	6.45066e-05	69	0.000526111	0.000304212
Left Supramarginal Gyrus; posterior division	Left Inferior Frontal Gyrus; pars triangularis	2603	22	0.00104277	0.00061794	1341	0.000422431	0.000211499	26	0.000692744	0.000168156
Left Postcentral Gyrus	Left Superior Temporal Gyrus; anterior division	4857	23	0.00102742	5.04572e-06	52	0.00102925	0.000440133	17	0.000804303	0.000110422
Left Precuneous Cortex	Right Superior Temporal Gyrus; posterior division	1147	24	0.0010246	0.000202865	265	0.000758104	0.000248205	150	0.000380877	0.000310985
Left Temporal Fusiform Cortex; posterior division	Left Angular Gyrus	1645	25	0.00101855	6.45066e-05	836	0.000532166	0.000165854	751	0.000123254	0.000199546
Left Inferior Temporal Gyrus; temporooccipital part	Left Planum Polare	4163	26	0.00101755	0.000697413	83	0.000966292	0.000211634	14	0.000842623	0.000546085
Right Parietal Operculum Cortex	Right Parahippocampal Gyrus; posterior division	4084	27	0.00100727	0.000855783	847	0.000529761	0.000565962	456	0.000191019	0.000101141
Right Postcentral Gyrus	Left Superior Temporal Gyrus; posterior division	1232	28	0.00100403	0.000519606	8	0.00140324	0.000455234	15	0.000837978	0.000783353
Right Middle Frontal Gyrus	Left Angular Gyrus	1609	30	0.000999802	0.000816335	1121	0.000463986	0.000112014	22	0.000724014	0.000109271
Left Precuneous Cortex	Right Occipital Fusiform Gyrus	1397	31	0.000999387	0.000282338	662	0.00058442	0.000110287	1304	4.57847e-05	3.96214e-05
Right Angular Gyrus	Left Putamen	850	33	0.000997977	0.000381248	1059	0.000477506	0.000289821	132	0.000401447	5.75633e-06
Left Insular Cortex	Right Inferior Frontal Gyrus; pars triangularis	3040	34	0.000993747	0.000677976	137	0.000870078	0.000343526	172	0.000359477	0.000440268
Left Frontal Orbital Cortex	Left Middle Temporal Gyrus; posterior division	549	35	0.000993332	0.00014398	115	0.000904748	0.000962311	86	0.000492021	0.000165278
Left Frontal Orbital Cortex	Right Middle Temporal Gyrus; posterior division	651	36	0.000988687	9.32882e-05	377	0.000688099	0.000405424	140	0.000396802	0.000243024
Right Paracingulate Gyrus	Left Middle Temporal Gyrus; anterior division	3599	37	0.000983047	0.00030235	3	0.00155594	0.00103098	80	0.000502306	0.000323649
Left Cuneal Cortex	Right Pallidum	4454	38	0.000977407	0.000697988	45	0.0010494	0.000410605	1482	2.66248e-05	1.78383e-05
Right Middle Frontal Gyrus	Left Middle Temporal Gyrus; temporooccipital part	1843	39	0.000972762	0.000460721	233	0.000777679	6.79604e-05	246	0.000302993	0.00041968
Right Lateral Occipital Cortex; superior division	Right Juxtapositional Lobule Cortex (formerly Supplementary Motor Cortex)	1894	40	0.000965297	0.000421272	753	0.00055456	4.75076e-05	220	0.000323562	0.000736421
Right Middle Temporal Gyrus; temporooccipital part	Right Parahippocampal Gyrus; posterior division	4043	41	0.000958247	0.00091582	201	0.000808533	0.000407151	50	0.000584005	0.000423709
Right Occipital Fusiform Gyrus	Right Amygdala	3969	43	0.000950367	0.000342374	154	0.000849093	0.00012627	42	0.00060781	0.000404273
Left Temporal Fusiform Cortex; posterior division	Left Juxtapositional Lobule Cortex (formerly Supplementary Motor Cortex)	2975	45	0.000941492	0.000401835	672	0.000579775	0.000126981	517	0.000174099	0.000175504
Left Thalamus	Right Superior Parietal Lobule	348	46	0.000939667	3.32517e-05	414	0.00067176	0.000385412	16	0.000817408	0.000466612
Right Postcentral Gyrus	Right Superior Temporal Gyrus; anterior division	4663	47	0.000935852	0.000797474	965	0.000500896	0.000224739	786	0.000115789	0.000238995
Left Hippocampus	Left Angular Gyrus	1648	48	0.000930212	0.000119311	80	0.000967122	0.000856359	360	0.000227348	0.000181261
Left Inferior Temporal Gyrus; temporooccipital part	Right Parietal Operculum Cortex	3149	49	0.000929797	0.000659115	10	0.00134012	0.000593898	25	0.000700209	0.000128708
Left Angular Gyrus	Right Middle Temporal Gyrus; anterior division	3543	51	0.000923327	1.32396e-05	289	0.000739939	0.00066328	181	0.000352012	0.000479716
Left Precuneous Cortex	Left Planum Temporale	3179	52	0.000920922	0.000718576	88	0.000957417	0.000152173	211	0.000332852	0.000261885
Left Temporal Pole	Left Intracalcarine Cortex	2501	54	0.000908812	0.00044186	151	0.000853738	0.000363538	1559	2.05699e-05	3.16741e-05
Right Precuneous Cortex	Right Temporal Pole	114	55	0.000889653	0.000659691	846	0.000530341	0.000600941	652	0.000145234	0.000615197
Right Thalamus	Right Middle Temporal Gyrus; temporooccipital part	731	56	0.000887413	0.000309393	274	0.000752049	0.000386563	83	0.000497661	0.000560916
Right Paracingulate Gyrus	Left Middle Temporal Gyrus; posterior division	557	57	0.000883598	0.000521333	247	0.000771624	7.03979e-05	1007	8.21142e-05	0.000433936
Right Superior Parietal Lobule	Left Subcallosal Cortex	3266	58	0.000870493	0.000877522	1451	0.000402442	0.000638663	254	0.000297353	2.40416e-05
Right Lateral Occipital Cortex; superior division	Right Lingual Gyrus	193	59	0.000870078	0.000343526	1352	0.000419197	0.000124678	528	0.000170864	0.000160673
Right Postcentral Gyrus	Left Superior Temporal Gyrus; anterior division	4858	62	0.000864438	0.000739164	475	0.00064978	3.02386e-05	11	0.000872898	0.000145707
Right Middle Frontal Gyrus	Right Putamen	874	63	0.000852743	9.96444e-05	252	0.000769219	0.000661418	341	0.000239043	0.000438541
Right Supramarginal Gyrus; anterior division	Left Accumbens	5113	64	0.000847683	0.00022518	1251	0.000438771	0.000191487	363	0.000225938	8.23512e-05
Left Middle Frontal Gyrus	Right Middle Temporal Gyrus; temporooccipital part	711	65	0.000846688	0.000858086	571	0.00061569	0.000169173	120	0.000425251	1.36802e-05
Left Supramarginal Gyrus; posterior division	Right Inferior Frontal Gyrus; pars triangularis	3050	66	0.000845278	9.56995e-05	68	0.000990927	0.000875795	81	0.000500896	0.000224739
Right Temporal Pole	Right Juxtapositional Lobule Cortex (formerly Supplementary Motor Cortex)	1906	67	0.000840218	0.000185731	123	0.000890648	2.67848e-05	165	0.000364122	0.000203
Right Postcentral Gyrus	Right Thalamus	385	68	0.000835988	0.00048246	426	0.00066612	1.02264e-05	121	0.000423427	0.000421407
Right Postcentral Gyrus	Left Paracingulate Gyrus	602	69	0.000833168	0.000680279	44	0.00104982	0.000123392	52	0.00057513	0.000364249
Right Insular Cortex	Right Inferior Frontal Gyrus; pars triangularis	3037	70	0.000832753	0.000146282	1018	0.000487791	0.000131451	96	0.000472446	0.000481443
Right Inferior Frontal Gyrus; pars triangularis	Left Subcallosal Cortex	3318	71	0.000828523	0.000443011	6	0.00143492	0.000137648	66	0.000530756	6.69441e-05
Left Frontal Pole	Left Inferior Temporal Gyrus; temporooccipital part	2279	72	0.000827113	0.000541921	1339	0.000422431	0.000211499	390	0.000209598	6.2339e-05
Left Planum Temporale	Left Superior Temporal Gyrus; anterior division	4931	74	0.000819648	0.000502472	46	0.00104841	0.000222301	19	0.000762749	1.0937e-05
Left Planum Polare	Right Pallidum	4462	75	0.000818238	0.000601381	11	0.00132013	0.000256264	109	0.000446236	0.000230936
Left Middle Frontal Gyrus	Right Pallidum	4379	76	0.000816828	0.000700291	339	0.000706264	9.65078e-06	1094	6.95895e-05	0.000376777
Right Postcentral Gyrus	Right Paracingulate Gyrus	413	78	0.000814008	0.00089811	2	0.00158099	0.000590444	10	0.000908398	9.2137e-05
Right Inferior Frontal Gyrus; pars opercularis	Left Superior Temporal Gyrus; anterior division	4924	81	0.000811188	0.00109593	117	0.000902343	0.000230495	30	0.000654425	0.000267506
Left Inferior Temporal Gyrus; posterior division	Left Middle Temporal Gyrus; anterior division	3609	84	0.000798663	0.000285216	1546	0.000386102	0.00061865	701	0.000132129	0.000259007
Left Inferior Temporal Gyrus; posterior division	Right Parietal Operculum Cortex	3120	85	0.000797253	0.000384126	95	0.000944312	0.000204016	128	0.000408912	3.36924e-05
Right Central Opercular Cortex	Left Subcallosal Cortex	3299	86	0.000793023	0.000680854	717	0.000566255	0.000304788	48	0.00058442	0.000110287
Right Inferior Temporal Gyrus; posterior division	Right Inferior Frontal Gyrus; pars triangularis	3048	87	0.000793023	0.000680854	305	0.000726834	0.00030709	745	0.000124664	0.000298456
Right Superior Parietal Lobule	Right Thalamus	404	89	0.000788378	0.000443587	643	0.00059006	0.000285351	63	0.000534986	0.000363673
Left Precentral Gyrus	Right Angular Gyrus	440	91	0.000779503	0.000503047	748	0.00055597	0.000146417	1317	4.29647e-05	1.98395e-05
Left Middle Frontal Gyrus	Right Temporal Pole	113	93	0.000778508	0.000113595	1257	0.000437361	0.000290397	1392	3.40897e-05	1.38934e-05
Left Inferior Frontal Gyrus; pars opercularis	Left Cuneal Cortex	3467	95	0.000776683	0.000700867	4	0.00155536	0.000135921	36	0.000642315	9.21012e-06
Right Superior Parietal Lobule	Left Superior Temporal Gyrus; posterior division	1251	96	0.000772453	9.97595e-05	96	0.000935437	0.000263477	351	0.000231578	0.00047799
Right Thalamus	Right Insular Cortex	589	97	0.000772039	0.000463599	238	0.000776269	0.00016687	249	0.000301583	0.00032077
Right Putamen	Right Temporal Fusiform Cortex; posterior division	2253	99	0.000769219	0.000661418	429	0.00066471	0.000109136	665	0.000139594	0.000219558
Left Precuneous Cortex	Left Heschl's Gyrus (includes H1 and H2)	4579	101	0.000765984	0.00032524	17	0.00121786	0.000160538	1144	6.53595e-05	8.00487e-05
Right Precentral Gyrus	Left Intracalcarine Cortex	2489	102	0.000764574	0.00042415	584	0.000609635	3.08142e-05	489	0.000181149	0.000319043
Right Angular Gyrus	Right Inferior Frontal Gyrus; pars triangularis	3033	103	0.000761754	0.000621969	431	0.00066471	0.000109136	486	0.000182559	0.000417953
Right Heschl's Gyrus (includes H1 and H2)	Left Superior Temporal Gyrus; anterior division	4949	109	0.000755699	0.000483611	114	0.000905578	0.000105682	12	0.000865018	0.000427739
Right Caudate	Left Occipital Fusiform Gyrus	1531	112	0.000740769	0.000404714	648	0.00058724	8.75319e-05	460	0.000190024	0.000378504
Right Superior Temporal Gyrus; posterior division	Left Planum Polare	4143	114	0.000736124	0.000167446	41	0.0010601	3.49786e-05	101	0.000460336	0.00075816
Right Middle Temporal Gyrus; anterior division	Left Superior Temporal Gyrus; anterior division	4935	117	0.000730484	0.000563084	959	0.000502306	0.000323649	203	0.000337497	2.46172e-05
Left Supramarginal Gyrus; anterior division	Left Inferior Frontal Gyrus; pars triangularis	2596	120	0.000727664	0.000760903	1232	0.000441591	6.33196e-06	380	0.000218473	0.0001218
Right Precuneous Cortex	Right Superior Temporal Gyrus; anterior division	4665	123	0.000724014	0.000109271	20	0.00120716	0.000215088	452	0.000191848	5.65827e-05
Right Angular Gyrus	Left Insular Cortex	696	124	0.000723019	0.000523635	1225	0.000443416	0.000428755	503	0.000178329	0.000121224
Left Middle Frontal Gyrus	Left Frontal Orbital Cortex	218	125	0.000721609	0.000622545	1393	0.000411732	0.000164127	183	0.000349192	0.000281897
Right Precuneous Cortex	Left Intracalcarine Cortex	2494	126	0.000720199	0.000721454	1530	0.000389337	0.000282473	677	0.000138184	0.000120649
Right Frontal Orbital Cortex	Left Middle Temporal Gyrus; temporooccipital part	1855	127	0.000718789	0.000820364	9	0.00134153	0.000494989	5	0.00100967	0.000123967
Right Temporal Fusiform Cortex; posterior division	Left Supracalcarine Cortex	5218	128	0.000713729	4.90995e-05	442	0.000660065	0.000128132	646	0.000145649	8.11999e-05
Right Hippocampus	Right Inferior Frontal Gyrus; pars triangularis	3063	132	0.000705269	0.000642557	613	0.00059935	0.000189185	815	0.000111559	5.7734e-05
Left Occipital Pole	Left Amygdala	3669	135	0.000702034	0.00030638	214	0.000796838	0.000149871	594	0.000155934	0.00023957
Left Juxtapositional Lobule Cortex (formerly Supplementary Motor Cortex)	Right Pallidum	4448	137	0.000699214	0.000504199	221	0.000786554	8.49952e-06	970	8.91643e-05	6.06121e-05
Left Precuneous Cortex	Right Lingual Gyrus	209	139	0.000697804	0.000603108	103	0.000929382	0.000125119	229	0.000316512	0.000241873
Right Frontal Pole	Left Precuneous Cortex	171	140	0.000696394	0.000702018	102	0.000929382	0.000125119	259	0.000295943	7.4868e-05
Left Putamen	Right Inferior Frontal Gyrus; pars opercularis	2669	146	0.000691749	0.00046475	744	0.00055738	0.000245327	1044	7.56444e-05	2.38419e-05
Left Cingulate Gyrus; posterior division	Left Intracalcarine Cortex	2528	149	0.000690339	0.00056366	49	0.00103489	4.44944e-05	875	0.000104094	1.82853e-05
Left Precentral Gyrus	Right Middle Frontal Gyrus	83	150	0.000688514	0.000128573	1260	0.000436946	0.0002436	772	0.000120434	1.7269e-06
Right Angular Gyrus	Left Central Opercular Cortex	1305	151	0.000687519	0.000761479	299	0.000728659	0.000127997	1009	8.16993e-05	1.00061e-05
Left Cingulate Gyrus; posterior division	Right Middle Temporal Gyrus; anterior division	3529	154	0.000682874	0.000524211	658	0.000585415	0.000522619	225	0.000320742	0.000538602
Left Lateral Occipital Cortex; superior division	Left Inferior Frontal Gyrus; pars opercularis	2018	161	0.000675409	0.000484762	107	0.000921917	8.567e-05	453	0.000191848	5.65827e-05
Left Putamen	Left Inferior Frontal Gyrus; pars triangularis	2597	164	0.000672589	0.000682581	817	0.000536811	7.14142e-05	750	0.000123254	0.000199546
Right Parahippocampal Gyrus; posterior division	Left Supracalcarine Cortex	5241	165	0.000672174	0.000148585	829	0.000534986	0.000363673	420	0.000201718	0.000635784
Left Superior Parietal Lobule	Right Central Opercular Cortex	1742	169	0.000667944	0.000445313	601	0.00060217	8.63449e-06	518	0.000174099	0.000175504
Left Precentral Gyrus	Left Superior Temporal Gyrus; posterior division	1230	170	0.00066471	0.000109136	756	0.00055315	5.1402e-05	439	0.000196078	0.000240146
Left Superior Parietal Lobule	Left Inferior Frontal Gyrus; pars triangularis	2587	171	0.000662304	0.000840952	157	0.000846273	0.000324089	949	9.19843e-05	0.000258431
Right Middle Temporal Gyrus; posterior division	Right Planum Temporale	3864	175	0.000661889	0.000306955	885	0.000522876	0.000640389	1453	3.08548e-05	4.75111e-05
Right Precentral Gyrus	Left Juxtapositional Lobule Cortex (formerly Supplementary Motor Cortex)	2930	181	0.000654425	0.000267506	108	0.000918682	0.000250507	24	0.000719369	0.000346539
Left Middle Frontal Gyrus	Left Inferior Frontal Gyrus; pars opercularis	2024	184	0.000653015	0.000366416	1221	0.000444411	0.000204151	344	0.000234813	0.000141812
Right Angular Gyrus	Right Amygdala	3946	186	0.0006526	0.000167581	125	0.000886418	0.000323514	573	0.000160579	2.30253e-06
Left Precentral Gyrus	Left Cuneal Cortex	3408	187	0.000650195	0.000564235	950	0.000504131	0.000111439	1232	5.04296e-05	0.000158946
Right Occipital Fusiform Gyrus	Left Angular Gyrus	1649	188	0.00064414	0.000425877	536	0.000625975	1.0802e-05	131	0.000401447	5.75633e-06
Left Frontal Pole	Left Occipital Pole	92	189	0.000643145	0.00105878	1375	0.000414967	0.000172051	124	0.000414967	0.000172051
Right Postcentral Gyrus	Left Juxtapositional Lobule Cortex (formerly Supplementary Motor Cortex)	2933	195	0.000638085	0.000287519	19	0.00121322	7.67299e-05	65	0.000532166	0.000165854
Left Lateral Occipital Cortex; inferior division	Left Cingulate Gyrus; posterior division	920	197	0.000636675	0.000386428	284	0.000743589	0.000206894	301	0.000264258	0.000518014
Left Temporal Pole	Right Inferior Frontal Gyrus; pars opercularis	2644	198	0.000635265	0.000485338	295	0.000735709	0.000366551	152	0.000380462	0.000223012
Right Angular Gyrus	Right Juxtapositional Lobule Cortex (formerly Supplementary Motor Cortex)	1921	199	0.000635265	0.000485338	1570	0.000381872	0.000321922	145	0.000390747	0.000381383
Left Lateral Occipital Cortex; inferior division	Right Pallidum	4388	200	0.00063485	4.86588e-05	1060	0.000477506	0.000289821	1220	5.50745e-05	7.83218e-05
Right Temporal Pole	Right Pallidum	4386	201	0.00063485	4.86588e-05	359	0.000695564	0.000365975	58	0.000564845	0.000205878
Left Middle Frontal Gyrus	Right Temporal Occipital Fusiform Cortex	1439	203	0.000633855	0.000584247	1061	0.000477091	0.000244175	660	0.000142829	0.000116619
Left Precuneous Cortex	Right Supracalcarine Cortex	4969	204	0.000633855	0.000584247	73	0.000982632	0.000231647	807	0.000112969	4.11756e-05
Right Middle Temporal Gyrus; posterior division	Left Cingulate Gyrus; anterior division	1576	205	0.0006278	0.000445889	32	0.00111518	4.33432e-05	437	0.000196078	0.000240146
Right Inferior Frontal Gyrus; pars triangularis	Right Frontal Operculum Cortex	4543	206	0.0006278	0.000445889	72	0.000983462	0.000836347	91	0.000477091	0.000244175
Left Precuneous Cortex	Left Putamen	839	207	0.0006278	0.000445889	432	0.0006633	0.000208046	286	0.000272138	5.54315e-05
Right Precuneous Cortex	Right Planum Polare	3750	211	0.000624565	0.000109712	350	0.000698799	2.97979e-05	40	0.00061992	0.000127556
Left Middle Frontal Gyrus	Right Paracingulate Gyrus	414	212	0.00062357	0.000742618	188	0.000822053	0.000229344	403	0.000204953	0.000299607
Right Frontal Orbital Cortex	Right Hippocampus	1795	213	0.00062216	0.000841527	1448	0.000402857	0.000104666	18	0.000798663	0.000285216
Left Putamen	Right Inferior Frontal Gyrus; pars triangularis	3044	215	0.000620335	0.00040644	1527	0.000389752	0.000251524	661	0.000142414	0.000417377
Right Frontal Pole	Right Putamen	861	216	0.000618925	0.00050535	78	0.000969527	0.000124543	808	0.000112969	4.11756e-05
Left Occipital Pole	Right Insular Cortex	575	218	0.000618925	0.00050535	13	0.00127575	4.10406e-05	38	0.00062697	0.000622104
Right Angular Gyrus	Left Supramarginal Gyrus; posterior division	1111	219	0.000618925	0.00050535	466	0.000653015	0.000366416	617	0.000151704	5.71583e-05
Right Precuneous Cortex	Right Angular Gyrus	444	223	0.00061287	0.000366992	400	0.000674994	4.92345e-05	355	0.000229173	0.000253826
Right Inferior Frontal Gyrus; pars opercularis	Left Middle Temporal Gyrus; anterior division	3643	227	0.00060582	0.00086154	570	0.000616685	0.000463734	134	0.000401447	5.75633e-06
Left Lingual Gyrus	Right Inferior Temporal Gyrus; temporooccipital part	1680	228	0.000605405	0.000327543	311	0.000722604	1.03614e-05	445	0.000194668	0.000141236
Right Precentral Gyrus	Left Lingual Gyrus	355	229	0.000605405	0.000327543	810	0.000538221	2.74954e-05	272	0.000285243	0.000300758
Right Frontal Pole	Right Superior Temporal Gyrus; anterior division	4656	232	0.000603995	0.000426453	124	0.000889238	0.000125694	276	0.000282423	0.000102939
Left Caudate	Right Supramarginal Gyrus; anterior division	1997	234	0.000603995	0.000426453	874	0.000524701	0.000205302	260	0.000295528	0.000459129
Left Parietal Operculum Cortex	Left Superior Temporal Gyrus; anterior division	4927	236	0.000602585	0.000525362	681	0.00057596	0.000703745	60	0.00055738	0.000245327
Right Angular Gyrus	Left Inferior Frontal Gyrus; pars triangularis	2586	239	0.00059935	0.000189185	1256	0.000437361	0.000290397	865	0.000105504	8.06243e-05
Left Supramarginal Gyrus; posterior division	Right Amygdala	3963	244	0.00059653	0.000387004	1594	0.000377642	2.51929e-05	1224	5.32496e-05	0.000356765
Right Frontal Orbital Cortex	Right Parahippocampal Gyrus; anterior division	2170	245	0.00059512	0.000485913	104	0.000927557	0.000309968	270	0.000285658	0.000233238
Left Thalamus	Right Supramarginal Gyrus; anterior division	1976	247	0.00059371	0.000584823	1125	0.000463986	0.000112014	157	0.000371587	0.000163551
Right Middle Temporal Gyrus; temporooccipital part	Right Hippocampus	1808	248	0.0005923	0.000683733	444	0.000658655	2.92223e-05	740	0.000126074	0.000397365
Left Superior Frontal Gyrus	Right Middle Temporal Gyrus; anterior division	3498	252	0.000589065	0.000347555	1093	0.000469626	0.000283624	1063	7.28244e-05	4.06e-05
Left Temporal Fusiform Cortex; posterior division	Right Inferior Temporal Gyrus; temporooccipital part	1702	254	0.000586245	0.000545374	1535	0.000387927	0.000183563	1415	3.26797e-05	4.00243e-05
Left Juxtapositional Lobule Cortex (formerly Supplementary Motor Cortex)	Left Amygdala	3732	256	0.0005816	0.000308106	1186	0.000451876	0.000164702	369	0.000224113	0.000517438
Right Superior Parietal Lobule	Right Central Opercular Cortex	1737	257	0.0005816	0.000308106	671	0.000579775	0.000126981	112	0.000437361	0.000290397
Left Superior Parietal Lobule	Left Supramarginal Gyrus; posterior division	1112	258	0.00058102	0.000147501	1006	0.000490611	6.63685e-05	75	0.000511596	0.000150887
Right Postcentral Gyrus	Left Middle Temporal Gyrus; temporooccipital part	1837	260	0.00058019	0.000407016	883	0.000523291	0.000106393	752	0.000123254	0.000199546
Left Frontal Operculum Cortex	Left Accumbens	5142	261	0.00057737	0.000604835	512	0.00063203	0.00014916	623	0.000151289	0.000476838
Left Frontal Orbital Cortex	Right Supramarginal Gyrus; anterior division	1974	263	0.000574135	0.000268658	1005	0.000490611	6.63685e-05	1096	6.95895e-05	0.000376777
Right Cingulate Gyrus; posterior division	Left Lingual Gyrus	375	264	0.000572725	0.000367567	294	0.000737119	0.000465461	467	0.000188614	0.000279595
Left Frontal Pole	Right Paracingulate Gyrus	407	265	0.000572725	0.000367567	50	0.00103489	4.44944e-05	185	0.000347782	0.000182988
Left Hippocampus	Left Middle Temporal Gyrus; temporooccipital part	1882	266	0.00057173	0.000100047	135	0.000871488	0.000244616	92	0.000477091	0.000244175
Left Inferior Frontal Gyrus; pars opercularis	Right Amygdala	3980	272	0.00056526	0.000328119	889	0.000521881	7.48323e-06	281	0.000279188	0.000439116
Left Insular Cortex	Right Inferior Temporal Gyrus; temporooccipital part	1690	274	0.00056385	0.000427028	1328	0.000423841	0.00011259	999	8.31094e-05	0.00019897
Left Precentral Gyrus	Left Intracalcarine Cortex	2490	276	0.00056244	0.000525938	38	0.00109602	0.000261175	527	0.000172274	0.000259583
Right Superior Frontal Gyrus	Right Supracalcarine Cortex	4960	277	0.000562025	8.05886e-06	720	0.000564845	0.000205878	205	0.000337082	0.000558614
Right Paracingulate Gyrus	Right Middle Temporal Gyrus; posterior division	659	278	0.000562025	8.05886e-06	1108	0.000466391	0.000619802	82	0.000499486	0.000125829
Left Precentral Gyrus	Right Thalamus	383	280	0.000557795	0.00028867	537	0.000625975	1.0802e-05	664	0.000141004	0.000318468
Right Middle Temporal Gyrus; temporooccipital part	Left Inferior Frontal Gyrus; pars triangularis	2594	281	0.000557795	0.00028867	271	0.000753874	4.85239e-05	215	0.000328622	3.48436e-05
Left Occipital Pole	Left Inferior Frontal Gyrus; pars triangularis	2570	285	0.000552155	0.000684308	1589	0.000379052	0.000124102	258	0.000295943	7.4868e-05
Left Precuneous Cortex	Right Inferior Temporal Gyrus; posterior division	1009	289	0.000549335	0.000882127	595	0.00060499	0.000206454	795	0.000114379	0.000140085
Left Middle Frontal Gyrus	Left Superior Parietal Lobule	473	291	0.00054892	0.000348131	516	0.00063062	0.00024807	401	0.000206363	0.000398517
Right Lateral Occipital Cortex; inferior division	Right Hippocampus	1788	293	0.00054892	0.000348131	558	0.00061992	0.000127556	1211	5.64845e-05	2.05878e-05
Left Temporal Pole	Right Superior Temporal Gyrus; anterior division	4672	297	0.000547096	8.69563e-05	367	0.000693159	0.00036584	98	0.000469626	0.000283624
Left Frontal Pole	Left Paracingulate Gyrus	596	301	0.00054469	0.00064486	110	0.000914452	4.62213e-05	230	0.000316512	0.000241873
Right Thalamus	Left Putamen	848	302	0.000544276	0.000110863	1266	0.000435536	0.00014469	741	0.000126074	0.000397365
Right Middle Frontal Gyrus	Left Thalamus	266	307	0.00054046	0.000941588	1220	0.000444826	0.000329846	1373	3.73247e-05	1.97244e-05
Right Frontal Orbital Cortex	Left Supramarginal Gyrus; posterior division	1106	312	0.000538221	2.74954e-05	5	0.0014569	0.000278003	838	0.000106914	0.000179534
Left Superior Temporal Gyrus; posterior division	Right Planum Temporale	3878	313	0.000537225	0.000605411	330	0.000709499	0.000345828	186	0.000347782	0.000182988
Right Thalamus	Right Superior Temporal Gyrus; anterior division	4684	315	0.000535815	0.00070432	1284	0.000432716	5.31289e-05	169	0.000362297	0.000638087
Right Caudate	Left Inferior Frontal Gyrus; pars triangularis	2602	320	0.000531585	0.000100105	338	0.000706264	9.65078e-06	213	0.000330032	6.40659e-05
Right Frontal Orbital Cortex	Right Middle Temporal Gyrus; anterior division	3511	321	0.000531171	0.000467053	215	0.000795428	5.09614e-05	247	0.000302993	0.00041968
Left Lingual Gyrus	Right Parietal Operculum Cortex	3108	322	0.000530756	6.69441e-05	1363	0.000417787	2.57685e-05	237	0.000313278	0.00057805
Left Insular Cortex	Right Planum Polare	3778	325	0.000529346	3.19655e-05	515	0.00063062	0.00024807	353	0.000230168	0.00037908
Right Occipital Pole	Right Middle Temporal Gyrus; posterior division	641	326	0.000528351	0.000664872	181	0.000831343	0.000245192	884	0.000102684	0.000117195
Left Central Opercular Cortex	Left Superior Temporal Gyrus; anterior division	4902	327	0.000527936	0.000130875	159	0.000844863	0.000422999	361	0.000227348	0.000181261
Right Thalamus	Left Superior Temporal Gyrus; posterior division	1253	330	0.000526526	0.000229785	1343	0.000422431	0.000211499	13	0.000844033	0.000644995
Right Precuneous Cortex	Left Parahippocampal Gyrus; anterior division	2784	335	0.000523706	0.000427604	1092	0.000469626	0.000283624	597	0.000154524	0.000140661
Right Lateral Occipital Cortex; inferior division	Right Parietal Operculum Cortex	3099	338	0.000522296	0.000526513	526	0.00062921	0.00034698	1183	5.93046e-05	0.000218407
Left Hippocampus	Left Parahippocampal Gyrus; posterior division	3373	339	0.000520471	9.14264e-05	629	0.000594705	4.80832e-05	916	9.76243e-05	0.00065407
Left Supramarginal Gyrus; anterior division	Left Superior Temporal Gyrus; anterior division	4891	342	0.000516241	0.000388155	30	0.00113434	0.000174488	39	0.00062133	0.000226466
Right Postcentral Gyrus	Right Middle Temporal Gyrus; posterior division	637	345	0.000515826	0.000145842	460	0.00065542	0.0003654	244	0.000304403	0.00051859
Left Precuneous Cortex	Left Cuneal Cortex	3422	348	0.000510186	0.000249797	557	0.00062133	0.000226466	1051	7.42344e-05	0.00013951
Right Inferior Temporal Gyrus; posterior division	Right Parietal Operculum Cortex	3126	349	0.000508776	0.000348706	22	0.00117631	0.000260023	481	0.000185793	8.17756e-05
Right Superior Temporal Gyrus; posterior division	Left Planum Temporale	3208	351	0.000508776	0.000348706	1506	0.000392572	5.37046e-05	194	0.000343552	0.000113741
Left Superior Parietal Lobule	Left Superior Temporal Gyrus; anterior division	4882	353	0.000507366	0.000447616	869	0.000526111	0.000304212	339	0.000242278	0.000102363
Left Postcentral Gyrus	Left Angular Gyrus	1602	354	0.000506951	8.63806e-05	99	0.000933612	0.00017161	67	0.000526111	0.000304212
Left Inferior Temporal Gyrus; posterior division	Left Inferior Temporal Gyrus; temporooccipital part	2317	355	0.000505956	0.000546526	167	0.000840218	0.000185731	1038	7.84644e-05	0.000436238
Left Middle Frontal Gyrus	Right Inferior Frontal Gyrus; pars triangularis	3011	356	0.000505956	0.000546526	1348	0.000420607	0.000223588	850	0.000106914	0.000179534
Right Postcentral Gyrus	Right Inferior Frontal Gyrus; pars triangularis	3010	360	0.000502721	0.000210348	438	0.000660065	0.000128132	79	0.000505541	1.25289e-05
Right Supramarginal Gyrus; anterior division	Right Pallidum	4434	362	0.000501311	0.000309258	261	0.000760924	0.000446024	478	0.000185793	8.17756e-05
Right Precentral Gyrus	Right Inferior Temporal Gyrus; posterior division	994	365	0.000499901	0.000408167	853	0.000529346	3.19655e-05	943	9.48043e-05	0.000456251
Left Lateral Occipital Cortex; superior division	Right Juxtapositional Lobule Cortex (formerly Supplementary Motor Cortex)	1893	366	0.000499901	0.000408167	608	0.00060076	9.02751e-05	824	0.000111144	0.000476263
Right Middle Frontal Gyrus	Left Caudate	959	367	0.000499901	0.000408167	7	0.00142928	0.000533286	767	0.000120434	1.7269e-06
Right Paracingulate Gyrus	Right Middle Temporal Gyrus; anterior division	3515	368	0.000499486	0.000125829	127	0.000883183	1.26639e-05	469	0.000187618	0.000353311
Left Lateral Occipital Cortex; superior division	Right Superior Temporal Gyrus; anterior division	4658	372	0.000495256	0.000170899	1002	0.000490611	6.63685e-05	992	8.45194e-05	0.00029788
Right Lingual Gyrus	Left Middle Temporal Gyrus; anterior division	3590	375	0.000495256	0.000170899	642	0.00059147	0.000384261	1514	2.52148e-05	7.94731e-06
Right Precentral Gyrus	Right Supracalcarine Cortex	4954	376	0.000493846	0.000269809	609	0.00060076	9.02751e-05	836	0.000106914	0.000179534
Left Inferior Frontal Gyrus; pars triangularis	Left Parietal Operculum Cortex	2922	378	0.000492436	0.000368719	1110	0.000465396	1.31046e-05	626	0.000151289	0.000476838
Left Superior Temporal Gyrus; posterior division	Right Inferior Frontal Gyrus; pars triangularis	3053	384	0.000490611	6.63685e-05	483	0.000645135	0.000207029	432	0.000198898	0.000437965
Left Temporal Pole	Right Intracalcarine Cortex	2096	386	0.000489616	0.000566538	440	0.000660065	0.000128132	1178	5.93046e-05	0.000218407
Left Cingulate Gyrus; anterior division	Left Inferior Frontal Gyrus; pars triangularis	2612	387	0.000489201	3.25411e-05	660	0.00058442	0.000110287	560	0.000163399	0.000200122
Left Occipital Pole	Left Cingulate Gyrus; anterior division	1554	391	0.000483561	0.000428179	1489	0.000393982	4.5205e-05	570	0.000160579	2.30253e-06
Left Inferior Temporal Gyrus; posterior division	Right Middle Temporal Gyrus; anterior division	3525	392	0.000483561	0.000428179	1026	0.000483561	0.000428179	1497	2.52148e-05	7.94731e-06
Left Lingual Gyrus	Left Cingulate Gyrus; posterior division	930	396	0.000482151	0.000527089	18	0.00121786	0.000160538	1395	3.40897e-05	1.38934e-05
Left Hippocampus	Right Subcallosal Cortex	2467	400	0.000478916	0.000190912	1399	0.000411732	0.000164127	1165	6.39495e-05	1.88609e-05
Left Precentral Gyrus	Left Superior Frontal Gyrus	71	401	0.000478916	0.000190912	254	0.000767394	0.000226331	1529	2.38048e-05	1.94365e-05
Right Angular Gyrus	Right Parahippocampal Gyrus; anterior division	2175	409	0.000476096	0.000388731	859	0.000527936	0.000130875	232	0.000315102	0.000142963
Left Inferior Frontal Gyrus; pars opercularis	Left Accumbens	5114	410	0.000476096	0.000388731	587	0.000609635	3.08142e-05	1567	1.91599e-05	2.17831e-05
Left Inferior Frontal Gyrus; pars opercularis	Right Superior Temporal Gyrus; anterior division	4720	411	0.000474686	0.00048764	485	0.000645135	0.000207029	290	0.000268903	0.000280746
Left Juxtapositional Lobule Cortex (formerly Supplementary Motor Cortex)	Right Middle Temporal Gyrus; anterior division	3563	413	0.000474686	0.00048764	129	0.000877543	0.000382974	34	0.000646545	0.000305939
Right Occipital Fusiform Gyrus	Left Temporal Occipital Fusiform Cortex	2754	415	0.000473276	0.00058655	1409	0.000410322	6.52172e-05	347	0.000234398	0.000675809
Right Superior Frontal Gyrus	Right Heschl's Gyrus (includes H1 and H2)	4763	416	0.000472861	5.25533e-05	118	0.000900933	0.000131586	946	9.23992e-05	0.000275565
Left Paracingulate Gyrus	Right Cuneal Cortex	2381	418	0.000471451	0.000151463	462	0.00065401	0.00026649	188	0.000346372	8.40781e-05
Right Supramarginal Gyrus; posterior division	Left Accumbens	5082	421	0.000470041	0.000250372	958	0.000502306	0.000323649	414	0.000203543	0.000200697
Right Lateral Occipital Cortex; inferior division	Right Supramarginal Gyrus; anterior division	1971	434	0.000467221	0.000448192	93	0.000945722	0.000105107	682	0.000138184	0.000120649
Right Inferior Temporal Gyrus; posterior division	Right Heschl's Gyrus (includes H1 and H2)	4798	435	0.000465811	0.000547101	1378	0.000414967	0.000172051	644	0.000147059	0.00018011
Left Precentral Gyrus	Left Accumbens	5055	437	0.000465396	1.31046e-05	266	0.000756694	0.000149295	71	0.000524701	0.000205302
Left Thalamus	Right Supramarginal Gyrus; posterior division	519	438	0.000464401	0.000646011	394	0.000677814	0.000247054	374	0.000221293	0.000319619
Right Paracingulate Gyrus	Right Putamen	890	441	0.000462991	0.00074492	97	0.000935437	0.000263477	604	0.000154524	0.000140661
Right Cingulate Gyrus; anterior division	Left Accumbens	5072	443	0.000462576	0.000210924	805	0.000539631	0.000126405	94	0.000472861	5.25533e-05
Left Lateral Occipital Cortex; inferior division	Left Middle Temporal Gyrus; anterior division	3587	448	0.000461166	0.000309833	1050	0.000479911	0.000441995	253	0.000298763	0.000122951
Right Postcentral Gyrus	Right Middle Temporal Gyrus; anterior division	3493	450	0.000459756	0.000408743	226	0.000783319	0.000327678	158	0.000371172	0.000697548
Right Intracalcarine Cortex	Right Temporal Fusiform Cortex; posterior division	2276	459	0.000456521	7.25655e-05	131	0.000875718	5.21126e-05	595	0.000155934	0.00023957
Right Lateral Occipital Cortex; inferior division	Left Caudate	964	462	0.000455111	0.000171475	1098	0.000468216	0.000184715	126	0.000413142	0.000263036
Left Thalamus	Right Juxtapositional Lobule Cortex (formerly Supplementary Motor Cortex)	1914	465	0.000453701	0.000270385	356	0.000695979	0.000168021	1107	6.81795e-05	0.000277868
Left Supramarginal Gyrus; anterior division	Left Superior Temporal Gyrus; posterior division	1265	468	0.000452291	0.000369294	832	0.000533576	0.000264763	961	9.05743e-05	0.000159522
Right Frontal Orbital Cortex	Right Heschl's Gyrus (includes H1 and H2)	4778	470	0.000452291	0.000369294	963	0.000500896	0.000224739	303	0.000262848	0.000419104
Left Superior Temporal Gyrus; posterior division	Left Parietal Operculum Cortex	2900	474	0.000450881	0.000468204	668	0.000582595	0.0003248	243	0.000304817	1.54071e-05
Left Middle Temporal Gyrus; posterior division	Right Caudate	1068	476	0.000448061	0.000666023	1001	0.000492021	0.000165278	100	0.000460751	0.000224163
Left Hippocampus	Left Intracalcarine Cortex	2537	477	0.000447646	0.000132026	448	0.000658655	2.92223e-05	1131	6.53595e-05	8.00487e-05
Left Temporal Pole	Right Paracingulate Gyrus	422	482	0.000444826	0.000329846	581	0.000610215	0.00113609	85	0.000492021	0.000165278
Right Caudate	Right Subcallosal Cortex	2461	483	0.000444411	0.000204151	533	0.000627385	8.81075e-05	105	0.000451876	0.000164702
Right Juxtapositional Lobule Cortex (formerly Supplementary Motor Cortex)	Right Inferior Frontal Gyrus; pars opercularis	2690	484	0.000443416	0.000428755	79	0.000967702	0.000310544	330	0.000246923	0.000134905
Left Juxtapositional Lobule Cortex (formerly Supplementary Motor Cortex)	Left Supracalcarine Cortex	5228	486	0.000443416	0.000428755	26	0.00115391	0.000141677	1099	6.95895e-05	0.000376777
Right Frontal Pole	Left Parahippocampal Gyrus; anterior division	2775	488	0.000443416	0.000428755	122	0.000892058	7.21248e-05	811	0.000112969	4.11756e-05
Right Middle Temporal Gyrus; temporooccipital part	Left Cingulate Gyrus; anterior division	1578	490	0.000442006	0.000527665	39	0.0010825	8.33675e-05	428	0.000200723	2.87816e-06
Right Superior Parietal Lobule	Right Planum Temporale	3854	491	0.000442006	0.000527665	1507	0.000392572	5.37046e-05	1140	6.53595e-05	8.00487e-05
Left Lateral Occipital Cortex; superior division	Right Inferior Frontal Gyrus; pars opercularis	2630	493	0.000440596	0.000626574	480	0.00064696	0.000228058	141	0.000395392	0.000144115
Left Postcentral Gyrus	Right Subcallosal Cortex	2421	506	0.000435951	0.000389306	149	0.000856558	0.000165719	44	0.000598935	0.000344812
Right Putamen	Left Temporal Fusiform Cortex; posterior division	1218	507	0.000435951	0.000389306	1416	0.000408912	3.36924e-05	33	0.00065119	6.8671e-05
Right Lateral Occipital Cortex; superior division	Left Frontal Operculum Cortex	4189	509	0.000435951	0.000389306	1215	0.000446236	0.000230936	744	0.000124664	0.000298456
Right Lateral Occipital Cortex; superior division	Left Hippocampus	1329	515	0.000434126	4.57807e-05	465	0.00065401	0.00026649	712	0.000130719	0.000160097
Right Superior Parietal Lobule	Right Pallidum	4397	517	0.000432716	5.31289e-05	870	0.000525116	0.000328694	397	0.000208188	3.65705e-05
Right Middle Temporal Gyrus; anterior division	Right Superior Temporal Gyrus; anterior division	352	518	0.000431306	0.000152039	435	0.000660479	0.000405865	492	0.000179739	0.000220134
Left Frontal Pole	Left Lingual Gyrus	4740	519	0.000431306	0.000152039	1100	0.000467221	0.000448192	672	0.000138599	0.000413348
Left Temporal Pole	Right Middle Temporal Gyrus; temporooccipital part	719	524	0.000429896	0.000250948	607	0.00060076	9.02751e-05	1202	5.78945e-05	0.000119497
Left Frontal Orbital Cortex	Right Central Opercular Cortex	1732	529	0.000428486	0.000349858	768	0.000548506	0.000185866	1326	4.15547e-05	9.94852e-06
Right Cingulate Gyrus; posterior division	Right Temporal Occipital Fusiform Cortex	1455	531	0.000428486	0.000349858	422	0.00066894	0.000187593	348	0.000231993	5.60071e-05
Left Middle Frontal Gyrus	Right Superior Temporal Gyrus; posterior division	1136	533	0.000428486	0.000349858	775	0.000547096	8.69563e-05	832	0.000108324	0.000278443
Right Parahippocampal Gyrus; posterior division	Right Pallidum	4461	535	0.000427076	0.000448767	757	0.00055315	5.1402e-05	206	0.000336087	7.42924e-05
Left Cingulate Gyrus; posterior division	Right Inferior Frontal Gyrus; pars triangularis	3046	541	0.000422431	0.000211499	352	0.000697389	6.91117e-05	1364	3.97298e-05	5.34572e-05
Right Postcentral Gyrus	Left Middle Temporal Gyrus; posterior division	535	546	0.000422431	0.000211499	1509	0.000392157	0.000480292	1126	6.63546e-05	0.000712955
Right Lateral Occipital Cortex; inferior division	Left Cingulate Gyrus; posterior division	1985	552	0.000419611	0.000409319	913	0.000514831	0.000487065	463	0.000189028	0.000254402
Right Supramarginal Gyrus; posterior division	Right Supramarginal Gyrus; anterior division	921	551	0.000419611	0.000409319	64	0.0010032	0.000548387	354	0.000230168	0.00037908
Right Middle Frontal Gyrus	Left Supramarginal Gyrus; posterior division	1094	561	0.000416377	7.31411e-05	891	0.000521881	7.48323e-06	1117	6.67695e-05	0.000178958
Left Postcentral Gyrus	Left Juxtapositional Lobule Cortex (formerly Supplementary Motor Cortex)	2932	562	0.000416377	7.31411e-05	569	0.0006171	7.02629e-05	23	0.000722604	1.03614e-05
Right Inferior Frontal Gyrus; pars opercularis	Left Planum Polare	4168	565	0.000415381	0.000706047	179	0.000833748	0.000486624	300	0.000264258	0.000518014
Left Planum Temporale	Right Superior Temporal Gyrus; anterior division	4736	567	0.000414967	0.000172051	199	0.000808948	0.000126846	269	0.000289888	6.34903e-05
Left Precentral Gyrus	Right Middle Temporal Gyrus; anterior division	3491	569	0.000413557	0.00027096	297	0.000732889	0.000168732	569	0.000160579	2.30253e-06
Left Parietal Operculum Cortex	Right Pallidum	4447	574	0.000412147	0.00036987	89	0.000957417	0.000152173	678	0.000138184	0.000120649
Right Inferior Temporal Gyrus; posterior division	Left Cingulate Gyrus; anterior division	1585	584	0.000409327	0.000567689	132	0.000872898	0.000145707	1100	6.85944e-05	0.000256129
Right Caudate	Right Middle Temporal Gyrus; anterior division	3532	587	0.000406507	0.000765508	267	0.000755699	0.000483611	110	0.000444411	0.000204151
Left Paracingulate Gyrus	Right Occipital Fusiform Gyrus	1413	592	0.000406092	0.000231512	491	0.000642315	9.21012e-06	1229	5.18396e-05	0.000257856
Left Insular Cortex	Left Heschl's Gyrus (includes H1 and H2)	4597	594	0.000404682	0.000330421	373	0.000691334	6.92466e-05	649	0.000145649	8.11999e-05
Left Frontal Pole	Left Middle Temporal Gyrus; anterior division	3571	597	0.000404267	0.000203576	856	0.000528931	0.000502031	1166	6.35346e-05	0.000515136
Right Occipital Pole	Right Insular Cortex	572	600	0.000403272	0.000429331	31	0.00112405	1.61177e-05	848	0.000106914	0.000179534
Left Occipital Pole	Right Parietal Operculum Cortex	3095	602	0.000401862	0.00052824	1242	0.000441591	6.33196e-06	1459	2.94448e-05	3.76202e-05
Right Paracingulate Gyrus	Left Planum Polare	4124	603	0.000401447	5.75633e-06	696	0.00057231	0.000166429	1566	1.91599e-05	2.17831e-05
Right Postcentral Gyrus	Right Inferior Temporal Gyrus; temporooccipital part	1660	608	0.000400037	9.31533e-05	1032	0.000482151	0.000527089	823	0.000111144	0.000476263
Left Superior Frontal Gyrus	Left Inferior Temporal Gyrus; temporooccipital part	2290	611	0.000398627	0.000192063	840	0.000530756	6.69441e-05	1332	4.15547e-05	9.94852e-06
Right Central Opercular Cortex	Right Superior Temporal Gyrus; anterior division	4715	613	0.000398627	0.000192063	446	0.000658655	2.92223e-05	6	0.000999387	0.000282338
Left Superior Frontal Gyrus	Right Supracalcarine Cortex	4962	617	0.000397217	0.000290972	786	0.000544276	0.000110863	637	0.000148469	0.000279019
Left Occipital Fusiform Gyrus	Left Superior Temporal Gyrus; anterior division	4906	621	0.000395807	0.000389882	815	0.000536811	7.14142e-05	1214	5.50745e-05	7.83218e-05
Left Superior Temporal Gyrus; posterior division	Left Inferior Frontal Gyrus; pars opercularis	2066	626	0.000394397	0.000488792	296	0.000734299	0.000267641	279	0.000279603	9.48802e-05
Left Middle Frontal Gyrus	Right Heschl's Gyrus (includes H1 and H2)	4761	628	0.000391162	0.000152614	264	0.000759514	0.000347115	370	0.000222703	0.000418529
Right Parahippocampal Gyrus; posterior division	Right Superior Temporal Gyrus; anterior division	4746	637	0.000389752	0.000251524	500	0.00063908	0.000345388	1366	3.87347e-05	9.8334e-06
Left Cingulate Gyrus; anterior division	Left Middle Temporal Gyrus; anterior division	3626	645	0.000388342	0.000350433	647	0.00058865	0.000186442	733	0.000127899	3.77218e-05
Right Planum Temporale	Right Superior Temporal Gyrus; anterior division	4744	646	0.000387927	0.000183563	716	0.00056667	0.000229209	577	0.000159169	9.66071e-05
Left Temporal Pole	Left Paracingulate Gyrus	611	652	0.000385107	1.42558e-05	811	0.000538221	2.74954e-05	84	0.000492021	0.000165278
Left Cingulate Gyrus; posterior division	Left Temporal Occipital Fusiform Cortex	2744	657	0.000382287	0.000212075	136	0.000871073	0.000289381	645	0.000147059	0.00018011
Left Occipital Pole	Left Inferior Temporal Gyrus; temporooccipital part	2292	659	0.000382287	0.000212075	1031	0.000483146	0.000105817	1187	5.78945e-05	0.000119497
Right Temporal Pole	Right Middle Temporal Gyrus; anterior division	3501	663	0.000380877	0.000310985	818	0.000536811	7.14142e-05	1231	5.04296e-05	0.000158946
Right Paracingulate Gyrus	Left Cuneal Cortex	3432	664	0.000380877	0.000310985	653	0.00058724	8.75319e-05	663	0.000141004	0.000318468
Right Frontal Pole	Left Middle Temporal Gyrus; posterior division	528	665	0.000380877	0.000310985	1198	0.000449471	0.000567113	892	0.000100859	0.000317892
Left Heschl's Gyrus (includes H1 and H2)	Left Superior Temporal Gyrus; anterior division	4947	667	0.000380462	0.000223012	14	0.00127434	0.00013995	104	0.000456521	7.25655e-05
Left Middle Frontal Gyrus	Left Middle Temporal Gyrus; temporooccipital part	1838	674	0.000376647	0.000607713	213	0.000796838	0.000149871	907	9.80392e-05	0.000120073
Right Supramarginal Gyrus; posterior division	Right Putamen	893	678	0.000374822	0.000172626	697	0.00057231	0.000166429	376	0.000219883	0.00022071
Left Superior Parietal Lobule	Right Middle Temporal Gyrus; temporooccipital part	734	687	0.000373412	0.000271536	292	0.000737534	6.8536e-05	1170	6.25395e-05	0.00011777
Right Thalamus	Left Caudate	974	694	0.000373412	0.000271536	844	0.000530756	6.69441e-05	116	0.000428072	0.000184139
Right Middle Temporal Gyrus; posterior division	Right Caudate	1071	695	0.000372417	0.000904442	780	0.000545686	1.19533e-05	297	0.000266083	8.29268e-05
Left Temporal Pole	Left Lateral Occipital Cortex; inferior division	152	702	0.000372002	0.000370445	1359	0.000418782	0.000658675	207	0.000336087	7.42924e-05
Right Precentral Gyrus	Right Hippocampus	1774	703	0.000372002	0.000370445	148	0.000856558	0.000165719	545	0.000169039	0.00059576
Right Superior Parietal Lobule	Left Angular Gyrus	1622	711	0.000367772	0.000667174	141	0.000863028	0.000838074	969	8.91643e-05	6.06121e-05
Left Occipital Pole	Right Planum Polare	3755	718	0.000365947	0.000232087	236	0.000777679	6.79604e-05	74	0.000511596	0.000150887
Right Cingulate Gyrus; anterior division	Right Inferior Temporal Gyrus; temporooccipital part	1675	722	0.000365947	0.000232087	86	0.000960652	0.000184004	1110	6.67695e-05	0.000178958
Right Lateral Occipital Cortex; inferior division	Right Inferior Frontal Gyrus; pars triangularis	3021	735	0.000363127	0.000429906	1571	0.000381872	0.000321922	692	0.000135364	7.71705e-05
Left Superior Parietal Lobule	Left Frontal Operculum Cortex	4217	736	0.000363127	0.000429906	925	0.000513006	5.19777e-05	782	0.000117199	0.000337904
Right Lateral Occipital Cortex; inferior division	Right Putamen	879	740	0.000361717	0.000528816	1177	0.000455111	0.000171475	1016	8.16993e-05	0.000100061
Left Middle Frontal Gyrus	Right Cingulate Gyrus; anterior division	239	741	0.000361717	0.000528816	645	0.00058865	0.000186442	43	0.00060499	0.000206454
Left Cingulate Gyrus; anterior division	Right Subcallosal Cortex	2471	745	0.000359892	9.37289e-05	1444	0.000404267	0.000203576	564	0.000163399	0.000200122
Right Frontal Operculum Cortex	Left Superior Temporal Gyrus; anterior division	4946	753	0.000358482	0.000192638	827	0.000534986	0.000363673	705	0.000130719	0.000160097
Left Temporal Pole	Right Inferior Frontal Gyrus; pars triangularis	3019	752	0.000358482	0.000192638	553	0.00062133	0.000226466	928	9.62143e-05	0.00055516
Right Lateral Occipital Cortex; superior division	Right Cingulate Gyrus; anterior division	234	762	0.000357072	0.000291548	262	0.000759929	0.000186882	386	0.000212418	0.000260158
Right Angular Gyrus	Left Frontal Operculum Cortex	4216	768	0.000355247	0.000143539	310	0.000724014	0.000109271	45	0.00059711	0.000779899
Left Lingual Gyrus	Right Supramarginal Gyrus; anterior division	1980	771	0.000353837	4.46294e-05	789	0.000543861	0.000423134	897	9.94492e-05	0.000218983
Right Middle Frontal Gyrus	Left Frontal Operculum Cortex	4199	773	0.000352842	0.000588277	770	0.000548506	0.000185866	1226	5.18396e-05	0.000257856
Left Planum Temporale	Left Planum Polare	4175	774	0.000352427	5.42802e-05	40	0.00106334	0.000301199	119	0.000426662	8.52294e-05
Left Middle Frontal Gyrus	Right Planum Temporale	3836	780	0.000351432	0.000687186	180	0.000831343	0.000245192	320	0.000253973	0.000359643
Right Occipital Fusiform Gyrus	Right Pallidum	4424	782	0.000351017	0.00015319	1144	0.000459341	0.000125254	349	0.000231993	5.60071e-05
Left Occipital Fusiform Gyrus	Right Supramarginal Gyrus; anterior division	2008	784	0.000351017	0.00015319	202	0.000808533	0.000407151	309	0.000258618	0.000122376
Right Superior Parietal Lobule	Left Parietal Operculum Cortex	2876	789	0.000349607	0.000252099	12	0.00127716	5.7869e-05	779	0.000118609	0.000436814
Right Precuneous Cortex	Left Occipital Fusiform Gyrus	1494	797	0.000348197	0.000351009	286	0.000741764	0.000228193	108	0.000447231	0.00040197
Left Precentral Gyrus	Right Temporal Pole	110	801	0.000348197	0.000351009	813	0.000536811	7.14142e-05	334	0.000243688	0.000201273
Right Paracingulate Gyrus	Left Caudate	975	806	0.000348197	0.000351009	1195	0.000450466	6.57928e-05	394	0.000208188	3.65705e-05
Right Middle Temporal Gyrus; temporooccipital part	Left Putamen	858	808	0.000346787	0.000449919	140	0.000864023	0.000205167	578	0.000159169	9.66071e-05
Right Thalamus	Left Angular Gyrus	1624	809	0.000346372	8.40781e-05	506	0.00063485	4.86588e-05	993	8.45194e-05	0.00029788
Left Intracalcarine Cortex	Left Cuneal Cortex	3474	812	0.000343967	0.000647738	275	0.000752049	0.000386563	166	0.000364122	0.000203
Left Cingulate Gyrus; posterior division	Left Supracalcarine Cortex	5194	815	0.000343552	0.000113741	54	0.0010246	0.000202865	555	0.000166634	0.000136056
Right Superior Frontal Gyrus	Right Caudate	1045	823	0.000342142	0.000212651	1381	0.000413142	0.000263036	231	0.000316512	0.000241873
Right Superior Temporal Gyrus; posterior division	Left Inferior Frontal Gyrus; pars opercularis	2064	828	0.000340732	0.00031156	385	0.000685279	0.000207605	1408	3.26797e-05	4.00243e-05
Left Postcentral Gyrus	Right Central Opercular Cortex	1717	831	0.000339322	0.00041047	1442	0.000404267	0.000203576	816	0.000111559	5.7734e-05
Left Postcentral Gyrus	Right Inferior Temporal Gyrus; temporooccipital part	1659	834	0.000338907	0.000123527	1069	0.000474271	4.63563e-05	634	0.000148469	0.000279019
Left Occipital Pole	Right Central Opercular Cortex	1725	836	0.000336087	7.42924e-05	29	0.00113857	0.000471217	154	0.000377642	2.51929e-05
Right Frontal Operculum Cortex	Right Superior Temporal Gyrus; anterior division	4751	837	0.000336087	7.42924e-05	707	0.00056949	3.13899e-05	396	0.000208188	3.65705e-05
Right Superior Frontal Gyrus	Left Intracalcarine Cortex	2495	838	0.000336087	7.42924e-05	155	0.000849093	0.00012627	321	0.000253973	0.000359643
Left Frontal Orbital Cortex	Right Supramarginal Gyrus; posterior division	517	843	0.000334677	0.000173202	341	0.000705849	0.000524346	1458	2.94448e-05	3.76202e-05
Right Inferior Frontal Gyrus; pars triangularis	Left Superior Temporal Gyrus; anterior division	4929	856	0.000331857	0.000371021	143	0.000859378	3.21005e-05	1496	2.52148e-05	7.94731e-06
Left Superior Temporal Gyrus; posterior division	Right Parietal Operculum Cortex	3131	857	0.000330447	0.000469931	463	0.00065401	0.00026649	217	0.000326797	0.000400243
Right Paracingulate Gyrus	Right Subcallosal Cortex	2444	858	0.000330032	6.40659e-05	945	0.000505126	0.000521468	632	0.000148884	0.000254978
Left Temporal Pole	Right Frontal Operculum Cortex	4481	860	0.000328622	3.48436e-05	548	0.00062274	0.000325375	888	0.000102269	0.000416802
Left Middle Frontal Gyrus	Left Occipital Pole	99	863	0.000327212	0.000133753	139	0.000866843	7.34825e-06	357	0.000228758	0.00028017
Left Parahippocampal Gyrus; posterior division	Left Amygdala	3737	865	0.000327212	0.000133753	1269	0.000435536	0.00014469	1462	2.80348e-05	2.77292e-05
Left Superior Temporal Gyrus; posterior division	Right Juxtapositional Lobule Cortex (formerly Supplementary Motor Cortex)	1941	868	0.000327212	0.000133753	1008	0.000490611	6.63685e-05	387	0.000211008	0.000161249
Right Supramarginal Gyrus; posterior division	Left Occipital Fusiform Gyrus	1517	870	0.000327212	0.000133753	74	0.000981637	0.00040126	1189	5.78945e-05	0.000119497
Left Frontal Pole	Left Cingulate Gyrus; anterior division	1541	875	0.000325802	0.000232663	650	0.00058724	8.75319e-05	702	0.000132129	0.000259007
Left Postcentral Gyrus	Left Paracingulate Gyrus	601	877	0.000325802	0.000232663	458	0.000655835	0.000168597	1319	4.29647e-05	1.98395e-05
Right Insular Cortex	Left Parahippocampal Gyrus; anterior division	3009	880	0.000325802	0.000232663	270	0.000753874	4.85239e-05	567	0.000161989	0.000101212
Left Postcentral Gyrus	Right Inferior Frontal Gyrus; pars triangularis	2809	879	0.000325802	0.000232663	504	0.00063626	0.000147568	1093	7.00044e-05	0.000157219
Left Temporal Occipital Fusiform Cortex	Left Cuneal Cortex	3477	881	0.000325387	0.000301334	309	0.000725424	0.000208181	384	0.000218058	0.000655797
Left Cingulate Gyrus; posterior division	Left Occipital Fusiform Gyrus	1528	883	0.000324392	0.000331572	66	0.000995737	0.000587836	1582	1.77499e-05	1.18922e-05
Left Hippocampus	Right Juxtapositional Lobule Cortex (formerly Supplementary Motor Cortex)	1943	884	0.000324392	0.000331572	667	0.000582595	0.0003248	952	9.19843e-05	0.000258431
Left Supramarginal Gyrus; anterior division	Left Accumbens	5090	890	0.000324392	0.000331572	1450	0.000402857	0.000104666	596	0.000154524	0.000140661
Left Occipital Pole	Right Superior Parietal Lobule	339	889	0.000324392	0.000331572	1282	0.000434126	4.57807e-05	1059	7.28244e-05	4.06e-05
Left Cuneal Cortex	Left Superior Temporal Gyrus; anterior division	4934	891	0.000324392	0.000331572	942	0.000506951	8.63806e-05	1149	6.53595e-05	8.00487e-05
Left Supramarginal Gyrus; anterior division	Right Parietal Operculum Cortex	3121	902	0.000319747	9.43045e-05	288	0.000740354	0.000129283	1145	6.53595e-05	8.00487e-05
Left Precentral Gyrus	Left Temporal Fusiform Cortex; posterior division	1181	906	0.000319747	9.43045e-05	791	0.000542865	0.000209772	55	0.000569075	0.000502607
Right Postcentral Gyrus	Right Superior Frontal Gyrus	52	909	0.000318337	0.000193214	77	0.000972347	7.32761e-05	1011	8.16993e-05	0.000100061
Right Temporal Occipital Fusiform Cortex	Left Planum Polare	4149	911	0.000318337	0.000193214	903	0.000517651	0.000289246	533	0.000170864	0.000160673
Right Lateral Occipital Cortex; superior division	Right Frontal Operculum Cortex	4468	916	0.000316927	0.000292124	101	0.000930792	2.62092e-05	670	0.000139594	0.000219558
Right Precentral Gyrus	Left Paracingulate Gyrus	599	923	0.000316927	0.000292124	58	0.00101714	0.000163416	450	0.000193258	4.23269e-05
Left Precuneous Cortex	Right Middle Temporal Gyrus; posterior division	649	925	0.000315517	0.000391033	1051	0.000478916	0.000190912	323	0.000251153	0.000161824
Left Postcentral Gyrus	Right Precuneous Cortex	42	928	0.000315517	0.000391033	1281	0.000434126	4.57807e-05	948	9.19843e-05	0.000258431
Left Frontal Pole	Left Superior Frontal Gyrus	67	929	0.000315517	0.000391033	520	0.000630205	0.000285927	1473	2.66248e-05	1.78383e-05
Left Occipital Pole	Right Middle Temporal Gyrus; posterior division	644	937	0.000312282	5.48558e-05	602	0.00060217	8.63449e-06	35	0.000643725	0.00010812
Right Lateral Occipital Cortex; inferior division	Right Pallidum	4389	948	0.000309462	0.000252675	508	0.00063344	5.02508e-05	540	0.000169454	6.17634e-05
Right Precentral Gyrus	Left Middle Frontal Gyrus	32	953	0.000309462	0.000252675	490	0.000642315	9.21012e-06	201	0.000338907	0.000123527
Left Lingual Gyrus	Right Superior Temporal Gyrus; anterior division	4683	955	0.000309462	0.000252675	1091	0.000469626	0.000283624	671	0.000139594	0.000219558
Right Temporal Pole	Right Paracingulate Gyrus	421	962	0.000306642	0.000450494	376	0.000688099	0.000405424	1398	3.40897e-05	1.38934e-05
Left Thalamus	Left Inferior Frontal Gyrus; pars triangularis	2579	965	0.000305232	0.000549404	384	0.000685279	0.000207605	1312	4.29647e-05	1.98395e-05
Left Intracalcarine Cortex	Right Parietal Operculum Cortex	3152	966	0.000305232	0.000549404	655	0.00058724	8.75319e-05	696	0.000133539	0.000357917
Right Angular Gyrus	Left Pallidum	4308	968	0.000304817	1.54071e-05	1241	0.000441591	6.33196e-06	280	0.000279188	0.000439116
Left Superior Temporal Gyrus; posterior division	Right Pallidum	4421	971	0.000304817	1.54071e-05	1042	0.000481736	6.90759e-06	867	0.000105089	0.000614621
Left Cingulate Gyrus; posterior division	Right Inferior Frontal Gyrus; pars opercularis	2671	974	0.000303407	0.000114317	183	0.000829933	0.000344101	748	0.000123254	0.000199546
Left Postcentral Gyrus	Right Frontal Orbital Cortex	306	975	0.000303407	0.000114317	1517	0.000391162	0.000152614	526	0.000172274	0.000259583
Right Inferior Temporal Gyrus; temporooccipital part	Left Accumbens	5108	989	0.000301997	0.000213226	1412	0.000410322	6.52172e-05	1180	5.93046e-05	0.000218407
Right Precuneous Cortex	Right Thalamus	387	990	0.000301997	0.000213226	84	0.000963472	1.38152e-05	766	0.000121429	0.000634633
Right Superior Parietal Lobule	Right Middle Temporal Gyrus; temporooccipital part	729	994	0.000301997	0.000213226	1458	0.000401447	5.75633e-06	731	0.000127899	3.77218e-05
Right Paracingulate Gyrus	Right Parietal Operculum Cortex	3110	998	0.000300587	0.000312136	272	0.000753874	4.85239e-05	429	0.000200723	2.87816e-06
Right Angular Gyrus	Left Cingulate Gyrus; anterior division	1570	1002	0.000300587	0.000312136	1171	0.000455526	0.000705472	834	0.000106914	0.000179534
Right Middle Frontal Gyrus	Left Cingulate Gyrus; anterior division	1553	1008	0.000300587	0.000312136	1040	0.000481736	6.90759e-06	804	0.000112969	4.11756e-05
Left Precuneous Cortex	Left Middle Temporal Gyrus; posterior division	547	1014	0.000299177	0.000411045	1278	0.000434126	4.57807e-05	1069	7.28244e-05	4.06e-05
Right Inferior Frontal Gyrus; pars opercularis	Right Middle Temporal Gyrus; anterior division	3559	1018	0.000297767	0.000509955	718	0.000566255	0.000304788	78	0.000506951	8.63806e-05
Right Superior Parietal Lobule	Right Parahippocampal Gyrus; posterior division	4031	1021	0.000296357	0.000608865	743	0.000557795	0.00028867	221	0.000322567	0.000103515
Right Temporal Pole	Right Caudate	1050	1027	0.000294947	0.000707774	1230	0.000442006	0.000527665	289	0.000270728	0.000154341
Right Cingulate Gyrus; anterior division	Right Occipital Fusiform Gyrus	1400	1034	0.000294533	0.000173778	1268	0.000435536	0.00014469	1264	4.90196e-05	6.00365e-06
Right Cingulate Gyrus; posterior division	Right Putamen	885	1037	0.000293123	0.000272687	1277	0.000434126	4.57807e-05	579	0.000158754	0.00043739
Right Planum Temporale	Left Superior Temporal Gyrus; anterior division	4939	1041	0.000293123	0.000272687	437	0.000660065	0.000128132	95	0.000472446	0.000481443
Left Supramarginal Gyrus; anterior division	Right Supramarginal Gyrus; anterior division	1993	1045	0.000293123	0.000272687	160	0.000844863	0.000422999	694	0.000133954	0.00017608
Left Occipital Pole	Left Lateral Occipital Cortex; inferior division	150	1059	0.000288478	3.54193e-05	1194	0.000450466	6.57928e-05	531	0.000170864	0.000160673
Right Cingulate Gyrus; posterior division	Left Planum Polare	4119	1066	0.000287068	0.000134329	365	0.000694154	0.000267066	366	0.000225938	8.23512e-05
Left Postcentral Gyrus	Left Accumbens	5056	1067	0.000287068	0.000134329	893	0.000521881	7.48323e-06	266	0.000291298	0.0001624
Left Superior Temporal Gyrus; posterior division	Left Central Opercular Cortex	1325	1088	0.000284248	0.000332148	220	0.000790784	0.000288229	282	0.000277778	0.000340207
Left Occipital Fusiform Gyrus	Right Pallidum	4426	1117	0.000278193	0.00019379	396	0.000676404	0.000148144	1440	3.12697e-05	5.88852e-06
Right Supramarginal Gyrus; posterior division	Right Superior Temporal Gyrus; anterior division	4688	1132	0.000276783	0.000292699	833	0.000533576	0.000264763	1359	4.01447e-05	5.75633e-07
Left Lateral Occipital Cortex; inferior division	Left Lingual Gyrus	368	1145	0.000274958	0.000142388	709	0.00056808	0.000130299	530	0.000170864	0.000160673
Left Hippocampus	Right Frontal Operculum Cortex	4517	1146	0.000274958	0.000142388	1414	0.000408912	3.36924e-05	483	0.000184383	1.7134e-05
Right Occipital Fusiform Gyrus	Right Inferior Temporal Gyrus; temporooccipital part	1706	1148	0.000273963	0.000490519	346	0.000700209	0.000128708	274	0.000283833	0.000201849
Left Temporal Occipital Fusiform Cortex	Left Middle Temporal Gyrus; anterior division	3644	1152	0.000273963	0.000490519	627	0.0005957	0.000680989	328	0.000247918	0.000498002
Right Inferior Frontal Gyrus; pars triangularis	Left Heschl's Gyrus (includes H1 and H2)	4638	1159	0.000273548	4.34781e-05	171	0.000835573	5.1537e-05	917	9.76243e-05	0.00065407
Left Lingual Gyrus	Right Inferior Frontal Gyrus; pars opercularis	2655	1160	0.000273548	4.34781e-05	555	0.00062133	0.000226466	46	0.00058865	0.000186442
Right Precentral Gyrus	Left Cingulate Gyrus; anterior division	1544	1163	0.000272138	5.54315e-05	358	0.000695979	0.000168021	1027	8.02893e-05	1.15127e-06
Right Temporal Pole	Left Accumbens	5065	1167	0.000272138	5.54315e-05	934	0.000510186	0.000249797	1558	2.09848e-05	2.17256e-05
Left Lateral Occipital Cortex; inferior division	Left Inferior Frontal Gyrus; pars opercularis	2033	1170	0.000272138	5.54315e-05	1287	0.000431306	0.000152039	947	9.19843e-05	0.000258431
Right Inferior Frontal Gyrus; pars triangularis	Right Middle Temporal Gyrus; anterior division	3564	1175	0.000270728	0.000154341	688	0.00057372	0.000265339	435	0.000197488	0.000339056
Left Inferior Temporal Gyrus; temporooccipital part	Right Heschl's Gyrus (includes H1 and H2)	4821	1188	0.000270728	0.000154341	1129	0.000462576	0.000210924	440	0.000196078	0.000240146
Right Thalamus	Left Middle Temporal Gyrus; temporooccipital part	1858	1189	0.000269733	0.000787247	449	0.000657659	0.000603684	51	0.000578365	2.8071e-05
Left Juxtapositional Lobule Cortex (formerly Supplementary Motor Cortex)	Left Parahippocampal Gyrus; posterior division	3398	1192	0.000269318	0.000253251	634	0.000593295	5.08264e-05	216	0.000327212	0.000133753
Right Lateral Occipital Cortex; inferior division	Right Lingual Gyrus	208	1200	0.000269318	0.000253251	106	0.000921917	8.567e-05	651	0.000145649	8.11999e-05
Left Supramarginal Gyrus; anterior division	Left Frontal Operculum Cortex	4226	1230	0.000263263	0.000114892	1063	0.000476096	0.000388731	1049	7.56444e-05	0.000238419
Left Cingulate Gyrus; posterior division	Right Occipital Fusiform Gyrus	1421	1239	0.000261853	0.000213802	71	0.000984042	0.000330556	988	8.59294e-05	0.00039679
Left Insular Cortex	Right Parahippocampal Gyrus; posterior division	3094	1247	0.000261853	0.000213802	589	0.000608225	0.000129724	449	0.000193258	4.23269e-05
Right Middle Frontal Gyrus	Right Parietal Operculum Cortex	4042	1249	0.000261853	0.000213802	821	0.000536396	0.000462582	239	0.000309048	0.000281322
Right Temporal Fusiform Cortex; posterior division	Left Middle Temporal Gyrus; anterior division	3637	1251	0.000261853	0.000213802	686	0.00057372	0.000265339	1446	3.12697e-05	5.88852e-06
Right Postcentral Gyrus	Right Heschl's Gyrus (includes H1 and H2)	4760	1258	0.000260443	0.000312712	1360	0.000417787	2.57685e-05	242	0.000307638	0.000182412
Right Inferior Temporal Gyrus; posterior division	Left Temporal Occipital Fusiform Cortex	2746	1276	0.000255798	7.54436e-05	938	0.000508361	0.00018529	707	0.000130719	0.000160097
Right Superior Frontal Gyrus	Left Putamen	830	1280	0.000255798	7.54436e-05	779	0.000545686	1.19533e-05	1221	5.50745e-05	7.83218e-05
Left Occipital Pole	Left Planum Polare	4109	1282	0.000255798	7.54436e-05	1330	0.000423841	0.00011259	818	0.000111559	5.7734e-05
Right Occipital Pole	Left Cingulate Gyrus; posterior division	914	1283	0.000255798	7.54436e-05	47	0.00103771	0.000153325	461	0.000190024	0.000378504
Right Precentral Gyrus	Left Supracalcarine Cortex	5155	1300	0.000254388	0.000174353	1335	0.000423841	0.00011259	958	9.05743e-05	0.000159522
Right Lateral Occipital Cortex; inferior division	Right Superior Temporal Gyrus; anterior division	4674	1302	0.000252978	0.000273263	1088	0.000470041	0.000250372	412	0.000203543	0.000200697
Right Supramarginal Gyrus; posterior division	Right Inferior Frontal Gyrus; pars opercularis	2660	1304	0.000252978	0.000273263	1495	0.000393982	4.5205e-05	1257	4.90196e-05	6.00365e-06
Right Frontal Orbital Cortex	Left Central Opercular Cortex	1300	1310	0.000252978	0.000273263	1104	0.000466806	8.5805e-05	1330	4.15547e-05	9.94852e-06
Right Middle Temporal Gyrus; temporooccipital part	Left Temporal Fusiform Cortex; posterior division	1214	1312	0.000252978	0.000273263	865	0.000526111	0.000304212	1118	6.67695e-05	0.000178958
Left Superior Frontal Gyrus	Right Inferior Frontal Gyrus; pars triangularis	3015	1316	0.000252563	0.000260734	304	0.000727249	0.000226906	406	0.000204953	0.000299607
Left Hippocampus	Left Juxtapositional Lobule Cortex (formerly Supplementary Motor Cortex)	2978	1319	0.000251568	0.000372172	498	0.00063908	0.000345388	1238	5.04296e-05	0.000158946
Left Inferior Temporal Gyrus; posterior division	Left Middle Temporal Gyrus; temporooccipital part	2508	1340	0.000246923	0.000134905	1165	0.000456521	7.25655e-05	1212	5.64845e-05	2.05878e-05
Left Thalamus	Left Intracalcarine Cortex	1869	1339	0.000246923	0.000134905	1418	0.000408912	3.36924e-05	1391	3.40897e-05	1.38934e-05
Left Paracingulate Gyrus	Right Middle Temporal Gyrus; anterior division	3521	1343	0.000246923	0.000134905	347	0.000700209	0.000128708	1454	3.08548e-05	4.75111e-05
Left Frontal Pole	Left Superior Parietal Lobule	466	1360	0.000245513	0.000233814	250	0.000770214	2.85117e-05	904	9.80392e-05	0.000120073
Left Heschl's Gyrus (includes H1 and H2)	Right Superior Temporal Gyrus; anterior division	4752	1364	0.000245513	0.000233814	281	0.000746409	9.07515e-06	62	0.000538635	0.000506501
Left Caudate	Right Superior Temporal Gyrus; anterior division	4700	1367	0.000244103	0.000332724	858	0.000527936	0.000130875	1103	6.81795e-05	0.000277868
Right Precentral Gyrus	Left Frontal Operculum Cortex	4190	1371	0.000244103	0.000332724	1575	0.000380877	0.000310985	606	0.000154524	0.000140661
Left Postcentral Gyrus	Right Frontal Operculum Cortex	4471	1373	0.000244103	0.000332724	742	0.00055879	0.000344236	156	0.000372997	0.000262461
Left Middle Frontal Gyrus	Right Insular Cortex	569	1388	0.000242278	0.000102363	762	0.000549916	0.000284775	1035	7.88793e-05	9.77583e-05
Left Insular Cortex	Right Superior Temporal Gyrus; anterior division	4693	1392	0.000240868	3.4538e-06	1066	0.000475681	0.000145266	601	0.000154524	0.000140661
Right Superior Temporal Gyrus; posterior division	Left Superior Temporal Gyrus; anterior division	4899	1393	0.000240868	3.4538e-06	360	0.000694569	0.000266931	336	0.000242278	0.000102363
Left Temporal Fusiform Cortex; posterior division	Left Inferior Temporal Gyrus; temporooccipital part	1321	1398	0.000239458	9.54558e-05	1312	0.000426662	8.52294e-05	1361	4.01447e-05	5.75633e-07
Right Caudate	Left Central Opercular Cortex	2327	1399	0.000239458	9.54558e-05	1090	0.000470041	0.000250372	1447	3.12697e-05	5.88852e-06
Left Precuneous Cortex	Right Planum Temporale	3847	1401	0.000239458	9.54558e-05	484	0.000645135	0.000207029	732	0.000127899	3.77218e-05
Right Cingulate Gyrus; anterior division	Right Cuneal Cortex	2368	1419	0.000238048	0.000194365	450	0.000657245	6.96873e-05	1580	1.77499e-05	1.18922e-05
Left Frontal Orbital Cortex	Left Central Opercular Cortex	1296	1417	0.000238048	0.000194365	1477	0.000396802	0.000243024	589	0.000155934	0.00023957
Right Superior Temporal Gyrus; posterior division	Left Middle Temporal Gyrus; anterior division	3618	1435	0.000236638	0.000293275	670	0.000579775	0.000126981	1569	1.91599e-05	2.17831e-05
Right Thalamus	Left Pallidum	4306	1447	0.000233818	0.000491094	37	0.0011063	0.000102804	264	0.000292708	0.000261309
Left Thalamus	Right Superior Temporal Gyrus; posterior division	1151	1449	0.000233818	0.000491094	1558	0.000383697	0.000113165	1565	1.91599e-05	2.17831e-05
Right Lingual Gyrus	Right Parahippocampal Gyrus; anterior division	2165	1450	0.000233818	0.000491094	90	0.000956007	5.32639e-05	598	0.000154524	0.000140661
Left Inferior Temporal Gyrus; posterior division	Right Caudate	1074	1454	0.000233403	4.29025e-05	278	0.000747819	8.98344e-05	1122	6.67695e-05	0.000178958
Left Lateral Occipital Cortex; superior division	Right Parahippocampal Gyrus; anterior division	2147	1477	0.000230583	0.000154917	1039	0.000481736	6.90759e-06	367	0.000224528	1.65584e-05
Right Lateral Occipital Cortex; superior division	Left Planum Temporale	3163	1488	0.000230583	0.000154917	848	0.000529346	3.19655e-05	859	0.000105504	8.06243e-05
Left Parietal Operculum Cortex	Right Parahippocampal Gyrus; posterior division	4081	1524	0.000227763	0.000352736	1600	0.000377642	2.51929e-05	711	0.000130719	0.000160097
Left Frontal Pole	Right Superior Parietal Lobule	326	1525	0.000227763	0.000352736	302	0.000727249	0.000226906	454	0.000191848	5.65827e-05
Left Postcentral Gyrus	Right Postcentral Gyrus	27	1527	0.000226353	0.000451645	1308	0.000428072	0.000184139	196	0.000343137	0.000420256
Right Cingulate Gyrus; anterior division	Right Inferior Frontal Gyrus; pars triangularis	3025	1543	0.000223118	0.000115468	407	0.000673584	4.96751e-05	77	0.000511181	0.000383109
Right Cuneal Cortex	Right Supracalcarine Cortex	5019	1577	0.000221708	0.000214378	995	0.000493431	0.000264188	954	9.05743e-05	0.000159522
Right Occipital Pole	Left Cingulate Gyrus; anterior division	1551	1584	0.000220298	0.000313287	1286	0.000431306	0.000152039	1120	6.67695e-05	0.000178958
Left Frontal Orbital Cortex	Right Cingulate Gyrus; anterior division	252	1591	0.000218888	0.000412197	161	0.000844863	0.000422999	784	0.000117199	0.000337904
